# Supplementary material for: Selective N-α-C–H alkylation of cyclic tertiary amides via visible-light-mediated 1,5-hydrogen atom transfer
Source: Royal Society of Chemistry journal article supplement (doi:10.1039/d3qo00914a), 2023-01-01

## Supplementary Information

For

# Selective *N*- $\alpha$ -C-H Alkylation of Cyclic Tertiary Amides via Visible-Light-Mediated 1,5-Hydrogen Atom Transfer

Junlei Wang<sup>\*,1</sup>, Qinglin Xie<sup>1</sup>, Guocheng Gao<sup>1</sup>, Hongqing Li<sup>1</sup>, Wenyun Lu<sup>1, \*</sup>, Xiaodong Cai<sup>1</sup>, Xuemei Chen<sup>1</sup> and Binbin Huang<sup>\*,2</sup>

*1. School of Chemical Engineering, Guizhou Minzu University, Guiyang 550000, China.*

*E-mail: junleiwang@gzmu.edu.cn; luwenyun@163.com*

*2. College of Education for the Future & College of Arts and Sciences, Beijing Normal University, Zhuhai 519087, China.*

*E-mail: binbinhuang@bnu.edu.cn.*

## Contents

|   |                                                              |     |
|---|--------------------------------------------------------------|-----|
| 1 | General Information                                          | S1  |
| 2 | Optimization Studies                                         | S2  |
| 3 | General Procedure for Alkylation Reactions                   | S5  |
| 4 | General procedure for the Synthesis of Substrates.           | S6  |
| 5 | Product Characterization                                     | S7  |
| 6 | Synthetic Applications                                       | S17 |
| 7 | Mechanistic Studies                                          | S24 |
| 8 | Reference                                                    | S27 |
| 9 | Spectra for Substrates and Products Product Characterization | S28 |

## 1. General Information

All of reactions were performed under an ambient temperature, magnetically stirred, and monitored by thin-layer chromatography (TLC) using Qingdao Puke Separation Materials Co., Ltd TLC plates pre-coated with 250 um thickness silica gel 60 F254 plates and visualized by fluorescence quenching under UV light. All of the manipulations were carried out using oven-dried glassware, including standard Schlenk techniques. All of the reagents were purchased from Alfa, Energy-Chemical or Sigma-Aldrich and used without further purification. Solvents were purified according to the method of Grubbs.<sup>1</sup> <sup>1</sup>H NMR, <sup>13</sup>C NMR were recorded on a Bruker AV-400 (<sup>1</sup>H NMR at 400 MHz, <sup>13</sup>C NMR at 100 MHz, <sup>19</sup>F NMR at 376 MHz) spectrometers using tetramethylsilane (TMS) as internal standard. <sup>1</sup>H and <sup>19</sup>F multiplicities are indicated as follows: singlet (s), doublet (d), triplet (t), doublet of doublets (dd), quartet (q), multiplet (m), and broad resonance (br). Chemical shifts were calibrated using residual undeuterated solvent as an internal reference (CDCl<sub>3</sub>: 7.26 ppm <sup>1</sup>H NMR, 77.16 ppm <sup>13</sup>C NMR). High resolution massspectra (HRMS) were collected on Bruker Esquire LC mass spectrometer using electrospray ionization. Flash column chromatography was carried out on silica gel (particle size 300-400 mesh) and eluted with petroleum/ethyl acetate.

## 2. Optimization Studies

**Table S1.** Photocatalyst Screening.<sup>a,b</sup>

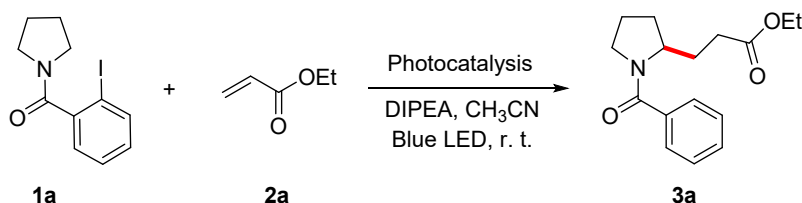

| Entry | Photocatalyst                                               | Reductant | Solvent            | Conversion(%) | Y(%) <sup>b</sup> |
|-------|-------------------------------------------------------------|-----------|--------------------|---------------|-------------------|
| 1     | Ru(bpy) <sub>3</sub> Cl <sub>2</sub>                        | DIPEA     | CH <sub>3</sub> CN | 10            | 5                 |
| 2     | Eosin Y                                                     | DIPEA     | CH <sub>3</sub> CN | 0             | 0                 |
| 3     | 4-CzIPN                                                     | DIPEA     | CH <sub>3</sub> CN | 42            | 57                |
| 4     | <i>fac</i> -Ir(dFppy) <sub>3</sub>                          | DIPEA     | CH <sub>3</sub> CN | 6             | 3                 |
| 5     | Ir(dFppy) <sub>2</sub> dtbpyPF <sub>6</sub>                 | DIPEA     | CH <sub>3</sub> CN | 65            | 61                |
| 6     | Ir(dFppy) <sub>2</sub> bpyPF <sub>6</sub>                   | DIPEA     | CH <sub>3</sub> CN | 57            | 54                |
| 7     | Ir(dFCF <sub>3</sub> ppy) <sub>2</sub> dtbpyPF <sub>6</sub> | DIPEA     | CH <sub>3</sub> CN | 38            | 61                |
| 8     | Ir(dFCF <sub>3</sub> ppy) <sub>2</sub> bpyPF <sub>6</sub>   | DIPEA     | CH <sub>3</sub> CN | 6             | 2                 |

<sup>a</sup>Reaction conditions: photocatalyst (1 mol%), **1a** (0.1 mmol, 1.0 equiv), **2a** (0.2 mmol, 2 equiv.), Reductant (2 equiv.), CH<sub>3</sub>CN (1 mL), room temperature, N<sub>2</sub> atmosphere, 12\*2 W blue LEDs, 72 h. <sup>b</sup>The isolated yields are shown.

**Table S2.** Reductant Screening.<sup>a,b</sup>

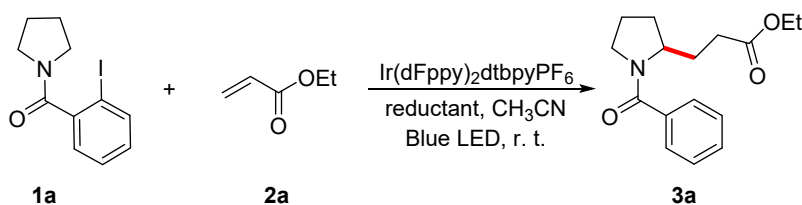

| Entry | Photocatalyst                               | Reductant           | Solvent            | Conversion(%) | Y(%) <sup>b</sup> |
|-------|---------------------------------------------|---------------------|--------------------|---------------|-------------------|
| 1     | Ir(dFppy) <sub>2</sub> dtbpyPF <sub>6</sub> | Et <sub>3</sub> N   | CH <sub>3</sub> CN | 25            | 40                |
| 2     | Ir(dFppy) <sub>2</sub> dtbpyPF <sub>6</sub> | TMEDA               | CH <sub>3</sub> CN | 10            | 30                |
| 3     | Ir(dFppy) <sub>2</sub> dtbpyPF <sub>6</sub> | quinuclidine        | CH <sub>3</sub> CN | 0             | 0                 |
| 4     | Ir(dFppy) <sub>2</sub> dtbpyPF <sub>6</sub> | Hantzsch Esters     | CH <sub>3</sub> CN | 47            | 38                |
| 5     | Ir(dFppy) <sub>2</sub> dtbpyPF <sub>6</sub> | Et <sub>3</sub> SiH | CH <sub>3</sub> CN | 0             | 0                 |

<sup>a</sup>Reaction conditions: photocatalyst (1 mol%), **1a** (0.1 mmol, 1.0 equiv), **2a** (0.2 mmol, 2 equiv.), Reductant (2 equiv.), CH<sub>3</sub>CN (1 mL), room temperature, N<sub>2</sub> atmosphere, 12\*2 W blue LEDs, 72 h. <sup>b</sup>The isolated yields are shown.

**Table S3.** Solvent Screening.<sup>a,b</sup>

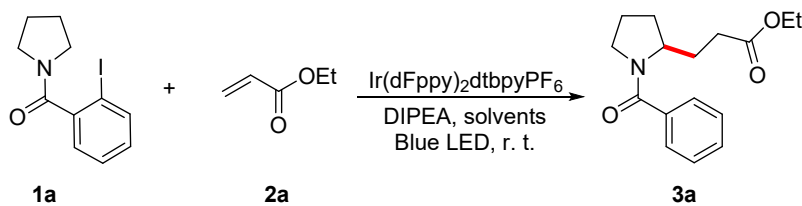

| Entry | Photocatalyst                               | Reductant | Solvent                            | Conversion(%) | Y(%) <sup>b</sup> |
|-------|---------------------------------------------|-----------|------------------------------------|---------------|-------------------|
| 1     | Ir(dFppy) <sub>2</sub> dtbpyPF <sub>6</sub> | DIPEA     | DCM                                | 36            | 37                |
| 2     | Ir(dFppy) <sub>2</sub> dtbpyPF <sub>6</sub> | DIPEA     | DCE                                | 42            | 29                |
| 3     | Ir(dFppy) <sub>2</sub> dtbpyPF <sub>6</sub> | DIPEA     | DMF                                | 0             | 0                 |
| 4     | Ir(dFppy) <sub>2</sub> dtbpyPF <sub>6</sub> | DIPEA     | DMSO                               | 55            | 38                |
| 5     | Ir(dFppy) <sub>2</sub> dtbpyPF <sub>6</sub> | DIPEA     | DMA                                | 30            | 39                |
| 6     | Ir(dFppy) <sub>2</sub> dtbpyPF <sub>6</sub> | DIPEA     | PhCF <sub>3</sub>                  | 3             | trace             |
| 7     | Ir(dFppy) <sub>2</sub> dtbpyPF <sub>6</sub> | DIPEA     | THF                                | 6             | trace             |
| 8     | Ir(dFppy) <sub>2</sub> dtbpyPF <sub>6</sub> | DIPEA     | HFIP                               | 0             | 0                 |
| 9     | Ir(dFppy) <sub>2</sub> dtbpyPF <sub>6</sub> | DIPEA     | CF <sub>3</sub> CH <sub>2</sub> OH | 0             | 0                 |
| 10    | Ir(dFppy) <sub>2</sub> dtbpyPF <sub>6</sub> | DIPEA     | 1,4-dioxane                        | 0             | 0                 |

<sup>a</sup>Reaction conditions: photocatalyst (1 mol%), **1a** (0.1 mmol, 1.0 equiv.), **2a** (0.2 mmol, 2 equiv.), Reductant (2 equiv.), CH<sub>3</sub>CN (1 mL), room temperature, N<sub>2</sub> atmosphere, 12\*2 W blue LEDs, 72 h. <sup>b</sup>The isolated yields are shown.

**Table S4.** Additive Screening.<sup>a,b</sup>

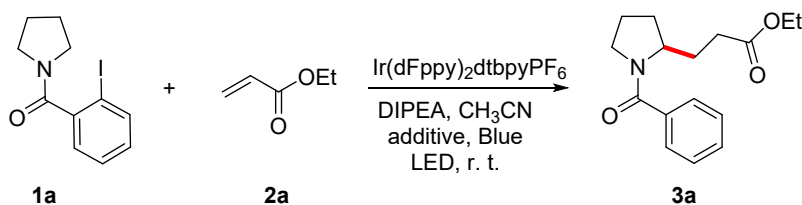

| Entry | Photocatalyst                               | Reductant | Additive            | Solvent            | Conversion(%) | Y(%) <sup>b</sup> |
|-------|---------------------------------------------|-----------|---------------------|--------------------|---------------|-------------------|
| 1     | Ir(dFppy) <sub>2</sub> dtbpyPF <sub>6</sub> | DIPEA     | NH <sub>4</sub> Cl  | CH <sub>3</sub> CN | 68            | 59                |
| 2     | Ir(dFppy) <sub>2</sub> dtbpyPF <sub>6</sub> | DIPEA     | Bu <sub>4</sub> NCl | CH <sub>3</sub> CN | 77            | 74                |
| 3     | Ir(dFppy) <sub>2</sub> dtbpyPF <sub>6</sub> | DIPEA     | Bu <sub>4</sub> NBr | CH <sub>3</sub> CN | 87            | 78                |
| 4     | Ir(dFppy) <sub>2</sub> dtbpyPF <sub>6</sub> | DIPEA     | Bu <sub>4</sub> NI  | CH <sub>3</sub> CN | 46            | 41                |

<sup>a</sup>Reaction conditions: photocatalyst (1 mol%), **1a** (0.1 mmol, 1.0 equiv.), **2a** (0.2 mmol, 2 equiv.), Reductant (2 equiv.), CH<sub>3</sub>CN (1 mL), room temperature, N<sub>2</sub> atmosphere, 12\*2 W blue LEDs, 72 h. <sup>b</sup>The isolated yields are shown.

**Table S5.** Reductant Amount Screening.<sup>a,b</sup>

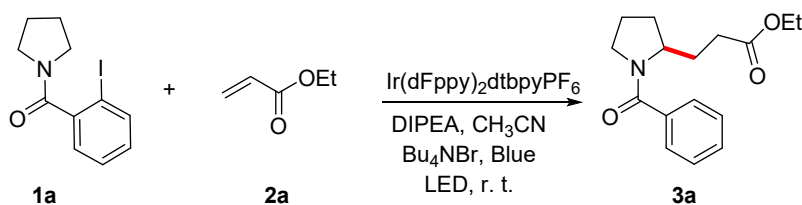

| Entry          | Photocatalyst                               | Reductant | Additive            | Solvent            | Conversion(%) | Y(%) <sup>b</sup> |
|----------------|---------------------------------------------|-----------|---------------------|--------------------|---------------|-------------------|
| 1 <sup>c</sup> | Ir(dFppy) <sub>2</sub> dtbpyPF <sub>6</sub> | DIPEA     | Bu <sub>4</sub> NBr | CH <sub>3</sub> CN | 100           | 81                |
| 2 <sup>d</sup> | Ir(dFppy) <sub>2</sub> dtbpyPF <sub>6</sub> | DIPEA     | Bu <sub>4</sub> NBr | CH <sub>3</sub> CN | 100           | 80                |

<sup>a</sup>Reaction conditions: photocatalyst (1 mol%), **1a** (0.1 mmol, 1.0 equiv.), **2a** (0.2 mmol, 2 equiv.), Reductant (2 equiv.), CH<sub>3</sub>CN (1 mL), room temperature, N<sub>2</sub> atmosphere, 12\*2 W blue LEDs, 72 h. <sup>b</sup>The isolated yields are shown. <sup>c</sup>the reaction was conducted with DIPEA (4 equiv.). <sup>d</sup>the reaction was conducted with DIPEA (6 equiv.).

**Table S6.** Directing Group Screening.<sup>a,b</sup>

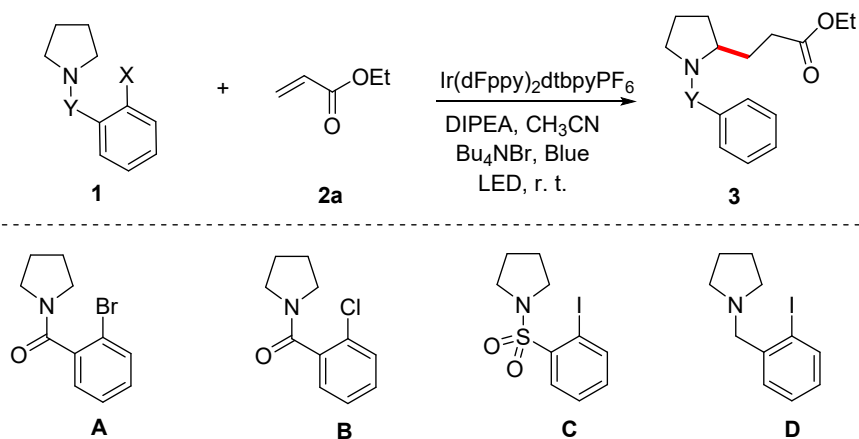

| Entry | Photocatalyst                               | Reductant | Additive            | Solvent            | Substrate | Y(%) <sup>b</sup> |
|-------|---------------------------------------------|-----------|---------------------|--------------------|-----------|-------------------|
| 1     | Ir(dFppy) <sub>2</sub> dtbpyPF <sub>6</sub> | DIPEA     | Bu <sub>4</sub> NBr | CH <sub>3</sub> CN | A         | 5                 |
| 2     | Ir(dFppy) <sub>2</sub> dtbpyPF <sub>6</sub> | DIPEA     | Bu <sub>4</sub> NBr | CH <sub>3</sub> CN | B         | 0                 |
| 3     | Ir(dFppy) <sub>2</sub> dtbpyPF <sub>6</sub> | DIPEA     | Bu <sub>4</sub> NBr | CH <sub>3</sub> CN | C         | 50                |
| 4     | Ir(dFppy) <sub>2</sub> dtbpyPF <sub>6</sub> | DIPEA     | Bu <sub>4</sub> NBr | CH <sub>3</sub> CN | D         | 0                 |

<sup>a</sup>Reaction conditions: photocatalyst (1 mol%), **1** (0.1 mmol, 1.0 equiv.), **2a** (0.2 mmol, 2 equiv.), Reductant (2 equiv.), CH<sub>3</sub>CN (1 mL), room temperature, N<sub>2</sub> atmosphere, 12\*2 W blue LEDs, 72 h. <sup>b</sup>The isolated yields are shown.

### 3. General Procedure for Alkylation Reactions

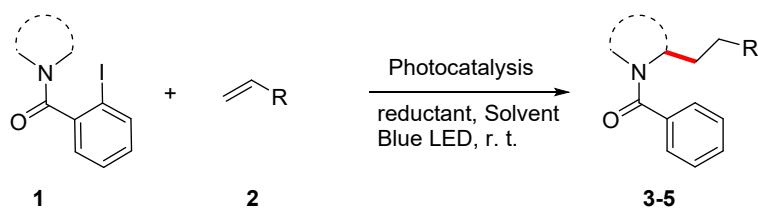

In a dried sealed tube, **1** (0.1 mmol), **2** (0.2 mmol), Ir(dFppy)<sub>2</sub>dtbpyPF<sub>6</sub> (1.0 mol %), DIPEA (0.4 mmol), Bu<sub>4</sub>NBr (0.2 mmol) were dissolved in CH<sub>3</sub>CN (1.0 mL). The flask was capped and degassed oxygen with N<sub>2</sub> for three times at -78 °C. And then, the reaction flask was exposed to 12 W\*2 blue LEDs at room temperature until the starting materials was completely consumed (monitored by TLC). After the reaction finished, the reaction solvent was distill under vacuum, the residue was purified by flash column chromatography on silica gel with a eluent of petroleum ether (PE) and ethyl acetate (EA) to give the desired products. The reaction set-up with blue LEDs (2\*12 W, Manufacturer: ouying, Model: 5317 (blue), WLP: 459.1 nm, Φ: 436.9 lm, Tc: 25000 K) as the light source. The irradiation vessel was in the middle of the two spotlights, approximate 7 cm to the light source.

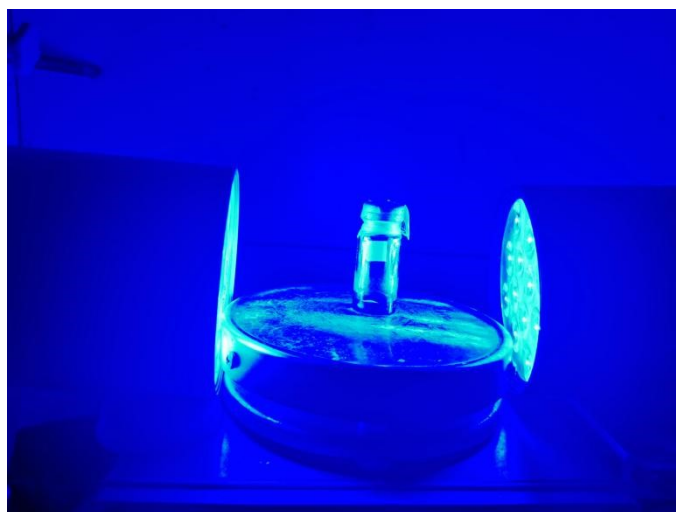

#### 4. General procedure for the synthesis of substrates.

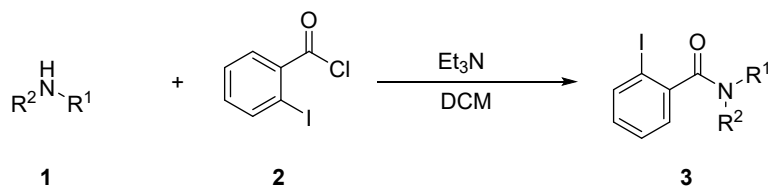

Amine **1** (1.0 equiv.),  $\text{Et}_3\text{N}$  (2 equiv.) were dissolved in DCM (0.2 M). And 2-iodobenzoylchloride **2** (1.0 equiv.) was added in dropwise at 0 °C. After addition, the reaction mixture was stirred at room temperature for 12 hours. After the material was completely consumed, 10 mL 1N HCl was added in the reaction mixture, and extracted with EA (20 mL\*3), the combined solvents were washed with brine (30 mL), dried over  $\text{Na}_2\text{SO}_4$ . The solvent was concentrated and purification by chromatography on silica gel to afford the desired substrates.<sup>2-5</sup>

## 5. Product Characterization

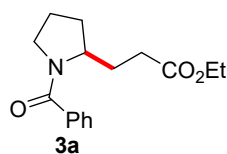

The reaction was conducted according to the general procedure using **1a** with CH<sub>3</sub>CN as the solvent. The reaction was run for 72 h, the desired product **3a** was purified by flash column chromatography with PE/EA (10:1) to afford **3a** (19.8 mg, 81% yield) as a colorless oil, 81% isolated yield.

**<sup>1</sup>H NMR (400 MHz, CDCl<sub>3</sub>):**  $\delta_H$  7.50 (d,  $J = 5.9$  Hz, 2H), 7.38 (d,  $J = 5.8$  Hz, 3H), 4.42-4.28 (m, 1H), 4.19-4.07 (m, 2H), 3.51-3.33 (m, 2H), 2.49-2.34 (m, 2H), 2.25 (dd,  $J = 13.2, 6.1$  Hz, 1H), 2.11-2.04 (m, 1H), 1.94-1.84 (m, 2H), 1.78-1.70 (m, 1H), 1.70 - 1.61 (m, 1H), 1.24 (t,  $J = 6.9$  Hz, 3H).

**<sup>13</sup>C NMR (101 MHz, CDCl<sub>3</sub>):**  $\delta_C$  173.6, 170.4, 137.3, 130.1, 128.3, 127.5, 60.6, 56.7, 50.2, 31.4, 30.3, 29.4, 25.1, 14.3.

**HRMS (ESI):** calcd for C<sub>16</sub>H<sub>22</sub>NO<sub>3</sub><sup>+</sup>, (M+H)<sup>+</sup>: 276.1594, found: 276.1600.

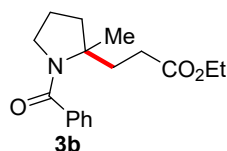

The reaction was conducted according to the general procedure using **1b** with CH<sub>3</sub>CN as the solvent. The reaction was run for 72 h, the desired product **3b** was purified by flash column chromatography with PE/EA (10:1) to afford **3b** (23.1 mg, 80% yield) as a colorless oil, 80% isolated yield.

**<sup>1</sup>H NMR (400 MHz, CDCl<sub>3</sub>):**  $\delta_H$  7.39 (ddd,  $J = 9.7, 6.8, 3.4$  Hz, 5H), 4.13 (q,  $J = 7.1$  Hz, 2H), 3.39 (t,  $J = 6.5$  Hz, 2H), 2.59-2.47 (m, 1H), 2.44 - 2.26 (m, 3H), 1.97 (dt,  $J = 11.1, 6.9$  Hz, 1H), 1.83 - 1.70 (m, 3H), 1.57 (s, 3H), 1.26 (t,  $J = 7.1$  Hz, 3H).

**<sup>13</sup>C NMR (101 MHz, CDCl<sub>3</sub>):**  $\delta_C$  173.8, 169.6, 138.9, 129.4, 128.4, 126.4, 64.6, 60.6, 52.2, 38.5, 32.8, 30.3, 24.5, 23.3, 14.4.

**HRMS (ESI):** calcd for C<sub>17</sub>H<sub>24</sub>NO<sub>3</sub><sup>+</sup>, (M+H)<sup>+</sup>: 290.1751, found: 290.1750.

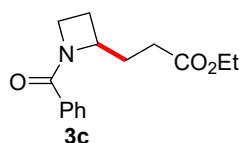

The reaction was conducted according to the general procedure using **1c** with CH<sub>3</sub>CN as the solvent. The reaction was run for 72 h, the desired product **3c** was purified by flash column chromatography with PE/EA (10:1) to afford **3c** (19.6 mg, 75% yield) as a colorless oil, 75% isolated yield.

**<sup>1</sup>H NMR (400 MHz, CDCl<sub>3</sub>):**  $\delta_H$  7.61 (d,  $J = 7.1$  Hz, 2H), 7.48 - 7.34 (m, 3H), 4.70 - 4.56 (m, 1H), 4.30 (s, 1H), 4.12 (d,  $J = 6.7$  Hz, 2H), 4.02 (s, 1H), 2.50 (s, 2H), 2.29 (s, 1H), 2.16 (s, 1H), 1.98 (s, 1H), 1.25 (dd,  $J = 14.7, 7.8$  Hz, 3H).

**<sup>13</sup>C NMR (101 MHz, CDCl<sub>3</sub>):**  $\delta_C$  173.6, 171.6, 136.2, 131.1, 128.5, 128.0, 61.2, 60.6, 51.0, 30.9, 30.8, 22.4, 14.3.

**HRMS (ESI):** calcd for C<sub>15</sub>H<sub>20</sub>NO<sub>3</sub><sup>+</sup>, (M+H)<sup>+</sup>: 262.1438, found: 262.1445.



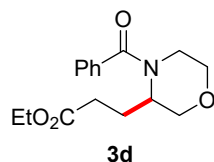

The reaction was conducted according to the general procedure using **1d** with CH<sub>3</sub>CN as the solvent. The reaction was run for 72 h, the desired product **3d** was purified by flash column chromatography with PE/EA (10:1) to afford **3d** (20.7 mg, 71% yield) as a colorless oil, 71% isolated yield.

**<sup>1</sup>H NMR (400 MHz, CDCl<sub>3</sub>):** δ<sub>H</sub> 7.40 (dd, *J* = 7.1, 2.9 Hz, 3H), 7.36 (dd, *J* = 6.7, 3.2 Hz, 2H), 4.83 - 4.27 (m, 1H), 4.12 (s, 2H), 3.80 (s, 2H), 3.69-3.61 (m, 1H), 3.43 (s, 3H), 2.35 (s, 3H), 2.00 (s, 1H), 1.24 (d, *J* = 6.2 Hz, 3H).

**<sup>13</sup>C NMR (101 MHz, CDCl<sub>3</sub>):** δ<sub>C</sub> 173.1, 170.9, 135.7, 129.9, 128.7, 126.99, 69.7, 67.3, 60.7, 48.8, 43.7, 31.0, 24.3, 14.3.

**HRMS (ESI):** calcd for C<sub>16</sub>H<sub>22</sub>NO<sub>4</sub><sup>+</sup>, (M+H)<sup>+</sup>: 292.1543, found: 292.1540.

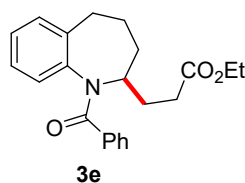

The reaction was conducted according to the general procedure using **1e** with CH<sub>3</sub>CN as the solvent. The reaction was run for 96 h, the desired product **3e** was purified by flash column chromatography with PE/EA (10:1) to afford **3e** (12.3 mg, 35% yield) as a colorless oil, 35% isolated yield.

**<sup>1</sup>H NMR (400 MHz, CDCl<sub>3</sub>):** δ<sub>H</sub> 7.18 (t, *J* = 7.3 Hz, 2H), 7.12 (q, *J* = 7.6 Hz, 4H), 7.06 (t, *J* = 7.4 Hz, 1H), 6.87 (t, *J* = 7.6 Hz, 1H), 6.59 (d, *J* = 7.8 Hz, 1H), 5.27 - 5.09 (m, 1H), 4.17 - 4.00 (m, 2H), 3.08 - 2.94 (m, 1H), 2.90 - 2.78 (m, 1H), 2.39-2.24 (m, 2H), 2.04 (ddd, *J* = 15.3, 7.6, 3.7 Hz, 1H), 1.94-1.84 (m, 1H), 1.74 (ddd, *J* = 28.4, 12.9, 2.7 Hz, 1H), 1.58 (dd, *J* = 12.5, 7.5 Hz, 2H), 1.23 (t, *J* = 7.1 Hz, 3H).

**<sup>13</sup>C NMR (101 MHz, CDCl<sub>3</sub>):** δ<sub>C</sub> 173.2, 170.1, 139.6, 139.5, 136.9, 130.6, 130.0, 129.5, 127.9, 127.8, 127.6, 126.8, 60.6, 51.8, 34.9, 32.9, 31.6, 26.3, 21.0, 14.3.

**HRMS (ESI):** calcd for C<sub>22</sub>H<sub>25</sub>NNaO<sub>3</sub><sup>+</sup>, (M+Na)<sup>+</sup>: 374.1727, found: 374.1722.

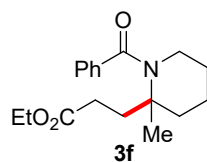

The reaction was conducted according to the general procedure using **1f** with CH<sub>3</sub>CN as the solvent. The reaction was run for 72 h, the desired product **3f** was purified by flash column chromatography with PE/EA (10:1) to afford **3f** (25.7 mg, 85% yield) as a colorless oil, 85% isolated yield.

**<sup>1</sup>H NMR (400 MHz, CDCl<sub>3</sub>):** δ<sub>H</sub> 7.44-7.34 (m, 3H), 7.34-7.28 (m, 2H), 4.81 (s, 1H), 4.11 (d, *J* = 5.4 Hz, 3H), 2.45 (s, 1H), 1.96 (s, 3H), 1.82 (td, *J* = 12.9, 6.4 Hz, 1H), 1.66 (s, 3H), 1.56-1.43 (m, 2H), 1.35-1.15 (m, 6H).

**<sup>13</sup>C NMR (101 MHz, CDCl<sub>3</sub>):** δ<sub>C</sub> 173.5, 171.9, 137.7, 128.99, 128.6, 125.9, 60.5, 49.6, 47.7, 32.2, 30.6, 30.1, 28.3, 21.1, 14.6, 14.3.

**HRMS (ESI):** calcd for  $C_{18}H_{26}NO_3^+$ ,  $(M+H)^+$ , 304.1907, found, 304.1915.

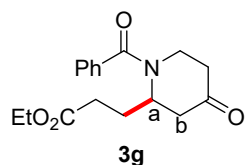

The reaction was conducted according to the general procedure using **1g** with  $CH_3CN$  as the solvent. The reaction was run for 72 h, the desired product **3g** was purified by flash column chromatography with PE/EA (10:1) to afford **3g** (13.6 mg, 45% yield) as a colorless oil, a:b = 1.6:1 (determined by NMR), 45% isolated yield.

**$^1H$  NMR (400 MHz,  $CDCl_3$ ):**  $\delta_H$  7.67-7.31 (m, 5H), 5.27 (s, 0.62H), 4.96 (s, 0.38H), 4.22-3.98 (m, 3H), 3.58-3.13 (m, 1H), 2.75 (s, 1H), 2.33 (s, 4H), 1.93 (dd,  $J$  = 17.8, 10.4 Hz, 2H), 1.33-1.15 (m, 4H).

**Major:  $^{13}C$  NMR (101 MHz,  $CDCl_3$ ):**  $\delta_C$  206.5, 172.50, 171.3, 135.5, 130.2, 128.8, 126.7, 60.8, 60.6, 45.7, 40.97, 31.7, 27.8, 14.23, 14.18.

**Minor:  $^{13}C$  NMR (101 MHz,  $CDCl_3$ ):**  $\delta_C$  206.6, 172.6, 171.5, 135.5, 130.2, 128.7, 126.6, 60.98, 60.5, 41.9, 33.8, 31.6, 27.1, 14.20, 14.11.

**HRMS (ESI):** calcd for  $C_{17}H_{22}NO_4^+$ ,  $(M+H)^+$ : 304.1543, found: 304.1537.

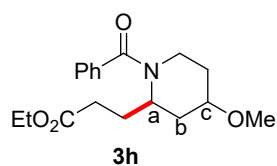

The reaction was conducted according to the general procedure using **1h** with  $CH_3CN$  as the solvent. The reaction was run for 72 h, the desired product **3h** was purified by flash column chromatography with PE/EA (10:1) to afford **3h** (10.8 mg, 34% yield) as a colorless oil, a:c = 1.5:1 (determined by NMR), 34% isolated yield.

**$^1H$  NMR (400 MHz,  $CDCl_3$ ):**  $\delta_H$  7.38 (dd,  $J$  = 6.6, 2.7 Hz, 3H), 7.34 (dd,  $J$  = 6.6, 3.0 Hz, 2H), 4.87 (d,  $J$  = 137.3 Hz, 1H), 4.12 (s, 2H), 3.73-3.44 (m, 2H), 3.39-3.28 (m, 3H), 3.03 (t,  $J$  = 68.9 Hz, 1H), 2.39 (s, 2H), 1.85 (ddd,  $J$  = 39.9, 34.8, 29.7 Hz, 5H), 1.55 (s, 1H), 1.24 (t,  $J$  = 9.8 Hz, 3H).

**$^{13}C$  NMR (101 MHz,  $CDCl_3$ ):**  $\delta_C$  173.4, 170.98, 136.4, 129.6, 128.7, 126.6, 73.5, 60.7, 55.8, 48.6, 41.6, 34.7, 32.2, 31.5, 26.2, 14.3.

**HRMS (ESI):** calcd for  $C_{18}H_{25}NNaO_4^+$ ,  $(M+Na)^+$ : 342.1676, found: 342.1683.

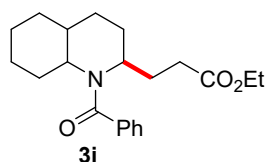

The reaction was conducted according to the general procedure using **1i** with  $CH_3CN$  as the solvent. The reaction was run for 72 h, the desired product **3i** was purified by flash column chromatography with PE/EA (10:1) to afford **3i** (10.6 mg, 31% yield) as a colorless oil, 31% isolated yield.

**$^1H$  NMR (400 MHz,  $CDCl_3$ ):**  $\delta_H$  7.44 - 7.39 (m, 2H), 7.39 - 7.33 (m, 3H), 4.16 - 4.05 (m, 2H), 3.91 - 3.80 (m, 1H), 2.94 (td,  $J$  = 11.3, 3.7 Hz, 1H), 2.38 (ddd,  $J$  = 19.1, 14.6, 5.1 Hz, 1H), 2.27 (dt,  $J$  = 9.7, 5.3

Hz, 2H), 2.23 - 2.13 (m, 1H), 2.12 - 2.00 (m, 1H), 1.87 - 1.82 (m, 1H), 1.81-1.78 (m, 1H), 1.78 - 1.69 (m, 3H), 1.63 (dd,  $J = 13.1, 2.6$  Hz, 2H), 1.46 (ddd,  $J = 10.9, 3.9, 2.0$  Hz, 1H), 1.37 (dd,  $J = 11.1, 4.0$  Hz, 1H), 1.33 - 1.27 (m, 1H), 1.24 (dd,  $J = 9.3, 4.9$  Hz, 3H), 1.19 (dt,  $J = 13.0, 3.1$  Hz, 1H), 1.02 (ddd,  $J = 15.5, 12.0, 6.3$  Hz, 1H).

$^{13}\text{C NMR}$  (101 MHz,  $\text{CDCl}_3$ ):  $\delta_{\text{C}}$  174.5, 173.2, 139.0, 129.6, 128.6, 127.0, 60.7, 58.97, 56.8, 39.3, 33.99, 31.5, 30.2, 29.2, 27.97, 26.96, 25.7, 25.3, 14.3.

**HRMS (ESI)**: calcd for  $\text{C}_{21}\text{H}_{30}\text{NO}_3^+$ ,  $(\text{M}+\text{H})^+$ : 344.2220, found: 344.2223.

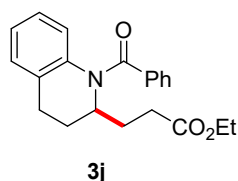

The reaction was conducted according to the general procedure using **1j** with  $\text{CH}_3\text{CN}$  as the solvent. The reaction was run for 72 h, the desired product **3j** was purified by flash column chromatography with PE/EA (10:1) to afford **3j** (10.6 mg, 38% yield) as a colorless oil, 38% isolated yield.

$^1\text{H NMR}$  (400 MHz,  $\text{CDCl}_3$ ):  $\delta_{\text{H}}$  7.29 (ddd,  $J = 8.6, 3.6, 1.7$  Hz, 1H), 7.25-7.17 (m, 3H), 7.15 (d,  $J = 7.1$  Hz, 1H), 7.00 (td,  $J = 7.5, 0.9$  Hz, 1H), 6.82 (t,  $J = 7.5$  Hz, 1H), 6.51 (d,  $J = 7.2$  Hz, 1H), 4.97-4.81 (m, 1H), 4.17-4.04 (m, 2H), 2.80 (t,  $J = 6.8$  Hz, 2H), 2.53 - 2.29 (m, 3H), 1.95-1.75 (m, 2H), 1.69 (tt,  $J = 12.9, 6.3$  Hz, 1H), 1.24 (t,  $J = 7.1$  Hz, 3H).

$^{13}\text{C NMR}$  (101 MHz,  $\text{CDCl}_3$ ):  $\delta_{\text{C}}$  173.4, 170.1, 138.0, 136.4, 132.6, 130.0, 128.7, 128.0, 126.9, 126.1, 125.3, 60.6, 51.9, 31.2, 29.9, 28.8, 25.2, 14.4.

**HRMS (ESI)**: calcd for  $\text{C}_{21}\text{H}_{24}\text{NO}_3^+$ ,  $(\text{M}+\text{H})^+$ : 338.1751, found: 338.1743.

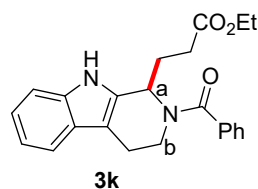

The reaction was conducted according to the general procedure using **1k** with  $\text{CH}_3\text{CN}$  as the solvent. The reaction was run for 72 h, the desired product **3k** was purified by flash column chromatography with PE/EA (10:1) to afford **3k** (17.3 mg, 46% yield) as a colorless oil, a:b = 3:1 (determined by NMR), 46% isolated yield.

$^1\text{H NMR}$  (400 MHz,  $\text{CDCl}_3$ ):  $\delta_{\text{H}}$  8.33 (s, 0.76H), 7.81 (s, 0.24H), 7.45 (s, 6H), 7.33 (d,  $J = 7.9$  Hz, 0.79H), 7.25-7.22 (m, 0.18H), 7.21-7.07 (m, 2H), 5.56 (d,  $J = 17.1$  Hz, 0.76H), 5.37 (s, 0.24H), 4.55 (dd,  $J = 64.8, 17.4$  Hz, 0.49H), 4.36-4.19 (m, 1.55H), 4.12 (dd,  $J = 14.2, 7.1$  Hz, 1H), 4.00 (dd,  $J = 6.9, 2.6$  Hz, 1H), 3.15 (d,  $J = 15.5$  Hz, 1H), 2.73 (t,  $J = 20.2$  Hz, 1H), 2.56-2.14 (m, 2H), 2.11-2.00 (m, 1H), 1.80-1.69 (m, 1H), 1.28-1.15 (m, 3H).

$^{13}\text{C NMR}$  (101 MHz,  $\text{CDCl}_3$ ):  $\delta_{\text{C}}$  172.6, 172.1, 136.6, 136.4, 130.1, 128.9, 128.7, 127.4, 126.8, 122.0, 119.7, 117.9, 111.2, 106.0, 60.8, 53.8, 37.3, 31.1, 27.1, 26.4, 14.3.

**HRMS (ESI)**: calcd for  $\text{C}_{23}\text{H}_{25}\text{N}_2\text{O}_3^+$ ,  $(\text{M}+\text{H})^+$ : 377.1860, found: 377.1859.

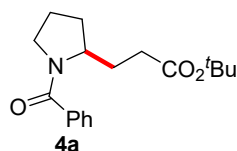

The reaction was conducted according to the general procedure using **1a** with CH<sub>3</sub>CN as the solvent. The reaction was run for 72 h, the desired product **4a** was purified by flash column chromatography with PE/EA (20:1) to afford **4a** (23.9 mg, 79% yield) as a colorless oil, 79% isolated yield.

**<sup>1</sup>H NMR (400 MHz, CDCl<sub>3</sub>):**  $\delta_H$  7.56-7.47 (m, 2H), 7.43 - 7.36 (m, 3H), 4.40 - 4.22 (m, 1H), 3.52 - 3.33 (m, 2H), 2.35 (dd,  $J = 15.7, 6.4$  Hz, 2H), 2.27 - 2.17 (m, 1H), 2.12 - 2.03 (m, 1H), 1.96 - 1.86 (m, 1H), 1.79 (dd,  $J = 20.4, 6.0$  Hz, 2H), 1.69 (dd,  $J = 11.5, 5.7$  Hz, 1H), 1.45 (s, 9H).

**<sup>13</sup>C NMR (101 MHz, CDCl<sub>3</sub>):**  $\delta_C$  172.9, 170.3, 137.4, 129.95, 128.3, 127.4, 80.3, 56.7, 50.1, 32.5, 30.3, 29.4, 28.2, 25.1.

**HRMS (ESI):** calcd for C<sub>18</sub>H<sub>26</sub>NO<sub>3</sub><sup>+</sup>, (M+H)<sup>+</sup>: 304.1907, found: 304.1900.

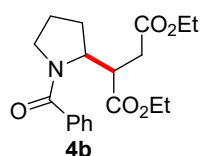

The reaction was conducted according to the general procedure using **1a** with CH<sub>3</sub>CN as the solvent. The reaction was run for 72 h, the desired product **4b** was purified by flash column chromatography with PE/EA (20:1) to afford **4b** (14.6 mg, 42% yield) as a colorless oil, 42% isolated yield.

**<sup>1</sup>H NMR (400 MHz, CDCl<sub>3</sub>):**  $\delta_H$  7.54 - 7.46 (m, 2H), 7.45 - 7.33 (m, 3H), 4.52 (dd,  $J = 12.8, 7.2$  Hz, 1H), 4.26 - 3.99 (m, 4H), 3.64 (dt,  $J = 10.1, 4.8$  Hz, 1H), 3.41 (dd,  $J = 9.0, 6.1$  Hz, 2H), 2.83 (dd,  $J = 16.7, 10.4$  Hz, 1H), 2.53 (dd,  $J = 16.7, 4.5$  Hz, 1H), 2.12-2.03 (m, 1H), 2.00 - 1.81 (m, 2H), 1.77-1.70 (m, 1H), 1.33-1.19 (m, 6H).

**<sup>13</sup>C NMR (101 MHz, CDCl<sub>3</sub>):**  $\delta_C$  173.2, 171.8, 170.5, 137.0, 130.3, 128.4, 127.6, 61.0, 60.9, 58.3, 50.8, 43.1, 34.0, 27.4, 25.1, 14.4, 14.3.

**HRMS (ESI):** calcd for C<sub>19</sub>H<sub>26</sub>NO<sub>5</sub><sup>+</sup>, (M+H)<sup>+</sup>: 348.1805, found: 348.1798.

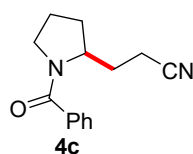

The reaction was conducted according to the general procedure using **1a** with CH<sub>3</sub>CN as the solvent. The reaction was run for 72 h, the desired product **4c** was purified by flash column chromatography with PE/EA (20:1) to afford **4c** (8.4 mg, 37% yield) as a colorless oil, 37% isolated yield.

**<sup>1</sup>H NMR (400 MHz, CDCl<sub>3</sub>):**  $\delta_C$  7.53 (d,  $J = 6.9$  Hz, 2H), 7.41 (q,  $J = 6.1$  Hz, 3H), 4.49 - 4.29 (m, 1H), 3.58-3.36 (m, 1H), 2.58-2.41 (m, 2H), 2.20 (ddd,  $J = 19.3, 13.0, 6.9$  Hz, 2H), 2.01 - 1.90 (m, 2H), 1.75 (dq,  $J = 14.5, 7.6$  Hz, 2H).

**<sup>13</sup>C NMR (101 MHz, CDCl<sub>3</sub>):**  $\delta_C$  171.1, 136.9, 130.4, 128.4, 127.5, 119.98, 56.5, 50.4, 30.7, 30.2, 25.2, 14.5.

**HRMS (ESI):** calcd for C<sub>14</sub>H<sub>17</sub>N<sub>2</sub>O<sup>+</sup>, (M+H)<sup>+</sup>: 229.1335, found: 229.1341.

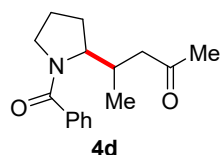

The reaction was conducted according to the general procedure using **1a** with CH<sub>3</sub>CN as the solvent. The reaction was run for 72 h, the desired product **4d** was purified by flash column chromatography with PE/EA (20:1) to afford **4d** (16.0 mg, 62% yield) as a colorless oil, dr = 1.9:1 (determined by NMR), 62% isolated yield.

**<sup>1</sup>H NMR (400 MHz, CDCl<sub>3</sub>):**  $\delta_H$  7.57-7.44 (m, 2H), 7.44-7.32 (m, 3H), 4.31 (ddd,  $J = 19.3, 12.2, 7.4$  Hz, 1H), 3.48-3.26 (m, 2H), 2.97-2.50 (m, 2H), 2.28 (dd,  $J = 16.2, 6.5$  Hz, 1H), 2.13 (d,  $J = 4.6$  Hz, 3H), 2.04-1.82 (m, 2H), 1.73 (ddd,  $J = 14.6, 11.8, 9.7$  Hz, 2H), 0.97 (dd,  $J = 11.1, 6.9$  Hz, 3H).

**<sup>13</sup>C NMR (101 MHz, CDCl<sub>3</sub>):**  $\delta_C$  209.2, 209.1, 171.3, 170.9, 137.1, 130.4, 130.2, 128.4, 128.3, 127.7, 127.6, 61.1, 51.8, 50.4, 48.6, 47.5, 32.4, 32.1, 30.4, 29.6, 27.1, 26.6, 25.4, 24.99, 16.9, 16.4.

**HRMS (ESI):** calcd for C<sub>16</sub>H<sub>22</sub>NO<sub>2</sub><sup>+</sup>, (M+H)<sup>+</sup>, 260.1645, found, 260.1646.

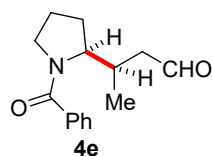

The reaction was conducted according to the general procedure using **1a** with CH<sub>3</sub>CN as the solvent.

The reaction was run for 72 h, the desired product **4e** was purified by flash column chromatography with PE/EA (20:1) to afford **4e** (11.3 mg, 45% yield) as a colorless oil, 45% isolated yield.

**<sup>1</sup>H NMR (400 MHz, CDCl<sub>3</sub>):**  $\delta_H$  9.74 (s, 1H), 7.49-7.39 (m, 2H), 7.37-7.28 (m, 3H), 4.26 (dd,  $J = 13.4, 6.9$  Hz, 1H), 3.42 – 3.27 (m, 2H), 2.73 (dt,  $J = 13.7, 6.8$  Hz, 1H), 2.63 (dd,  $J = 16.5, 5.5$  Hz, 1H), 2.23 (ddd,  $J = 16.4, 7.3, 1.7$  Hz, 1H), 1.95-1.81 (m, 2H), 1.74-1.62 (m, 2H), 0.94 (d,  $J = 6.8$  Hz, 3H).

**<sup>13</sup>C NMR (101 MHz, CDCl<sub>3</sub>):**  $\delta_C$  202.6, 171.0, 137.1, 130.3, 128.4, 127.6, 61.1, 50.8, 48.5, 30.8, 26.8, 25.2, 15.8.

**HRMS (ESI):** calcd for C<sub>15</sub>H<sub>20</sub>NO<sub>2</sub><sup>+</sup>, (M+H)<sup>+</sup>: 246.1489, found: 246.1494.

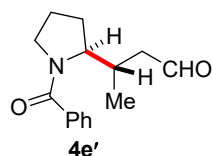

The reaction was conducted according to the general procedure using **1a** with CH<sub>3</sub>CN as the solvent.

The reaction was run for 72 h, the desired product **4e'** was purified by flash column chromatography with PE/EA (20:1) to afford **4e'** (7.8 mg, 32% yield) as a colorless oil, 32% isolated yield.

**<sup>1</sup>H NMR (400 MHz, CDCl<sub>3</sub>):**  $\delta_H$  9.65 (d,  $J = 3.6$  Hz, 1H), 7.57-7.47 (m, 2H), 7.44-7.35 (m, 3H), 4.32 (dd,  $J = 7.8, 4.2$  Hz, 1H), 3.48-3.39 (m, 1H), 3.30-3.12 (m, 2H), 2.52-2.40 (m, 1H), 2.32-2.22 (m, 1H), 2.08-1.96 (m, 1H), 1.84 (d,  $J = 5.7$  Hz, 1H), 1.84 (d,  $J = 5.7$  Hz, 1H), 1.75-1.60 (m, 3H), 1.05 (d,  $J = 7.0$  Hz, 3H).

**<sup>13</sup>C NMR (101 MHz, CDCl<sub>3</sub>):**  $\delta_C$  202.3, 171.4, 136.8, 130.6, 128.4, 127.7, 61.5, 51.7, 46.8, 30.3, 25.6, 25.4, 17.5.

**HRMS (ESI):** calcd for C<sub>15</sub>H<sub>20</sub>NO<sub>2</sub><sup>+</sup>, (M+H)<sup>+</sup>: 246.1489, found: 246.1491.

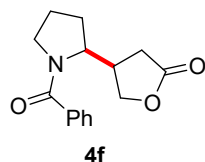

The reaction was conducted according to the general procedure using **1a** with CH<sub>3</sub>CN as the solvent. The reaction was run for 72 h, the desired product **4f** was purified by flash column chromatography with PE/EA (20:1) to afford **4f** (9.6 mg, 37% yield) as a colorless oil, dr = 1:1 (determined by NMR), 37% isolated yield.

**<sup>1</sup>H NMR (400 MHz, CDCl<sub>3</sub>):**  $\delta_H$  7.50 (d,  $J$  = 7.2 Hz, 2H), 7.47- 7.36 (m, 3H), 4.39 (ddd,  $J$  = 51.7, 38.0, 6.3 Hz, 3H), 3.48 (dd,  $J$  = 17.2, 8.4 Hz, 2H), 3.30 - 2.99 (m, 1H), 2.55 (tdd,  $J$  = 64.1, 17.6, 8.9 Hz, 2H), 2.22-2.04 (m, 1H), 2.01-1.87 (m, 1H), 1.78 (s, 1H), 1.73 - 1.61 (m, 1H).

**<sup>13</sup>C NMR (101 MHz, CDCl<sub>3</sub>):**  $\delta_C$  176.9, 176.5, 171.7, 171.5, 136.4, 136.4, 130.6, 130.6, 128.4, 127.5, 127.5, 71.8, 69.9, 58.5, 58.3, 51.7, 51.2, 40.2, 38.6, 31.8, 31.4, 28.6, 27.7, 25.1.

**HRMS (ESI):** calcd for C<sub>15</sub>H<sub>17</sub>NNaO<sub>3</sub><sup>+</sup>, (M+Na)<sup>+</sup>: 282.1101, found: 282.1100.

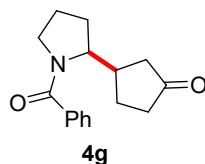

The reaction was conducted according to the general procedure using **1a** with CH<sub>3</sub>CN as the solvent. The reaction was run for 72 h, the desired product **4g** was purified by flash column chromatography with PE/EA (20:1) to afford **4g** (20.6 mg, 80% yield) as a colorless oil, dr = 1.4:1, 80% isolated yield.

**<sup>1</sup>H NMR (400 MHz, CDCl<sub>3</sub>):**  $\delta_H$  7.50 (d,  $J$  = 5.6 Hz, 2H), 7.45-7.37 (m, 3H), 4.69 - 4.44 (m, 1H), 3.47 (t,  $J$  = 6.6 Hz, 2H), 2.84 -2.59 (m, 1H), 2.45-2.29 (m, 2H), 2.24 - 2.02 (m, 4H), 1.91 (dd,  $J$  = 23.0, 9.3 Hz, 2H), 1.84-1.66 (m, 2H).

**<sup>13</sup>C NMR (101 MHz, CDCl<sub>3</sub>):**  $\delta_C$  218.8, 218.7, 171.2, 137.1, 130.3, 128.4, 127.5, 59.4, 59.3, 50.8, 50.6, 42.6, 41.4, 41.2, 40.9, 38.7, 38.5, 28.0, 27.9, 26.7, 25.6, 25.2, 25.1.

**HRMS (ESI):** calcd for C<sub>16</sub>H<sub>20</sub>NO<sub>2</sub><sup>+</sup>, (M+H)<sup>+</sup>: 258.1489, found: 258.1483.

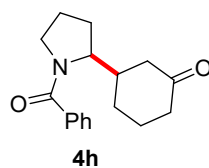

The reaction was conducted according to the general procedure using **1a** with CH<sub>3</sub>CN as the solvent. The reaction was run for 48 h, the desired product **4h** was purified by flash column chromatography with PE/EA (20:1) to afford **4h** (21.9 mg, 81% yield) as a colorless oil, dr = 2:1 (determined by NMR), 81% isolated yield.

**<sup>1</sup>H NMR (400 MHz, CDCl<sub>3</sub>):**  $\delta_H$  7.55-7.46 (m, 2H), 7.42-7.33 (m, 3H), 4.52-4.30 (m, 1H), 3.55-3.26 (m, 2H), 2.44 (d,  $J$  = 9.9 Hz, 1H), 2.37 (dd,  $J$  = 14.1, 1.7 Hz, 1H), 2.31-2.22 (m, 2H), 2.10 (ddd,  $J$  = 19.7, 9.8, 6.6 Hz, 1H), 2.04-1.95 (m, 1H), 1.94-1.82 (m, 3H), 1.80-1.67 (m, 2H), 1.66-1.46 (m, 2H).

$^{13}\text{C}$  NMR (101 MHz,  $\text{CDCl}_3$ ):  $\delta_{\text{C}}$  211.4, 211.3, 171.1, 170.96, 137.0, 130.3, 130.3, 128.3, 127.6, 127.6, 60.3, 51.0, 50.8, 45.1, 43.1, 42.2, 41.5, 41.3, 28.3, 27.3, 27.0, 26.5, 25.4, 25.3, 25.2.

HRMS (ESI): calcd for  $\text{C}_{17}\text{H}_{22}\text{NO}_2^+$ ,  $(\text{M}+\text{H})^+$ , 272.1645, found, 272.1653.

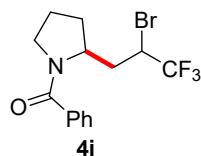

The reaction was conducted according to the general procedure using **1a** with  $\text{CH}_3\text{CN}$  as the solvent. The reaction was run for 72 h, the desired product **4i** was purified by flash column chromatography with PE/EA (20:1) to afford **4i** (16.1 mg, 46% yield) as a colorless oil, dr = 1:1 (determined by NMR), 46% isolated yield.

$^1\text{H}$  NMR (400 MHz,  $\text{CDCl}_3$ ):  $\delta_{\text{H}}$  7.53 (d,  $J = 6.3$  Hz, 2H), 7.41 (t,  $J = 6.3$  Hz, 3H), 4.53 (s, 1H), 3.60 - 3.36 (m, 2H), 3.06 (dd,  $J = 14.6, 3.3$  Hz, 1H), 2.77 - 2.62 (m, 1H), 2.14 (d,  $J = 6.7$  Hz, 1H), 1.97 - 1.85 (m, 1H), 1.74 (dt,  $J = 15.8, 8.3$  Hz, 3H).

$^{13}\text{C}$  NMR (101 MHz,  $\text{CDCl}_3$ ):  $\delta_{\text{C}}$  170.3, 137.1, 130.2, 128.7, 128.4, 127.71 (dd,  $J = 312.6$  Hz), 127.5, 126.6, 126.6, 56.1, 50.6, 34.1, 29.9, 29.8 (q,  $J = 30.4$  Hz), 29.6, 25.1.

$^{19}\text{F}$  NMR (376 MHz,  $\text{CDCl}_3$ ):  $\delta_{\text{F}}$  -82.49 (d,  $J = 40.8$  Hz), -89.00 (d,  $J = 40.8$  Hz).

HRMS (ESI): calcd for  $\text{C}_{14}\text{H}_{16}\text{BrF}_3\text{NO}^+$ ,  $(\text{M}+\text{H})^+$ , 350.0362, found, 350.0370.

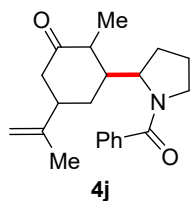

The reaction was conducted according to the general procedure using **1a** with  $\text{CH}_3\text{CN}$  as the solvent. The reaction was run for 72 h, the desired product **4j** was purified by flash column chromatography with PE/EA (20:1) to afford **4j** (26.3 mg, 81% yield) as a colorless oil, dr = 1:1 (determined by NMR), 81% isolated yield.

$^1\text{H}$  NMR (400 MHz,  $\text{CDCl}_3$ ):  $\delta_{\text{H}}$  7.57-7.46 (m, 2H), 7.44 - 7.33 (m, 3H), 4.89 - 4.79 (m, 1H), 4.69 (s, 1H), 4.52 (td,  $J = 8.1, 5.0$  Hz, 1H), 3.64-3.49 (m, 1H), 3.43 (td,  $J = 10.7, 5.4$  Hz, 1H), 2.83 (s, 1H), 2.75 - 2.60 (m, 2H), 2.49 (dd,  $J = 14.9, 6.1$  Hz, 1H), 2.15 (dq,  $J = 12.9, 6.5$  Hz, 1H), 2.08 - 1.98 (m, 2H), 1.95-1.84 (m, 2H), 1.82- 1.69 (m, 3H), 1.28-1.23 (m, 1H), 1.19 (d,  $J = 6.6$  Hz, 3H).

$^{13}\text{C}$  NMR (101 MHz,  $\text{CDCl}_3$ ):  $\delta_{\text{C}}$  211.9, 170.2, 145.8, 137.3, 130.3, 128.5, 127.5, 113.1, 58.6, 52.1, 47.4, 44.5, 40.1, 39.0, 26.9, 25.7, 25.1, 21.8, 11.8.

HRMS (ESI): calcd for  $\text{C}_{21}\text{H}_{28}\text{NO}_2^+$ ,  $(\text{M}+\text{H})^+$ , 326.2115, found, 326.2110.

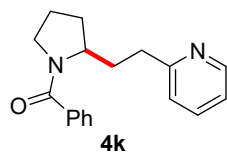

The reaction was conducted according to the general procedure using **1a** with  $\text{CH}_3\text{CN}$  as the solvent. The reaction was run for 68 h, the desired product **4k** was purified by flash column chromatography with PE/EA (20:1) to afford **4k** (21.3 mg, 76% yield) as a colorless oil, 76% isolated yield.

**<sup>1</sup>H NMR (400 MHz, CDCl<sub>3</sub>):**  $\delta_C$  8.52 (d,  $J$  = 4.3 Hz, 1H), 7.61 (t,  $J$  = 7.3 Hz, 1H), 7.48 (d,  $J$  = 7.4 Hz, 2H), 7.38 (d,  $J$  = 6.7 Hz, 3H), 7.29 (d,  $J$  = 7.9 Hz, 1H), 7.16 - 7.07 (m, 1H), 4.44 - 4.33 (m, 1H), 3.54 - 3.35 (m, 2H), 2.92 (t,  $J$  = 8.1 Hz, 2H), 2.49 - 2.40 (m, 1H), 2.19-2.09 (m, 1H), 1.94 (dt,  $J$  = 11.9, 7.4 Hz, 2H), 1.76 (ddd,  $J$  = 22.0, 12.9, 7.6 Hz, 2H).

**<sup>13</sup>C NMR (101 MHz, CDCl<sub>3</sub>):**  $\delta_C$  170.3, 161.7, 149.0, 137.5, 136.8, 130.0, 128.3, 127.5, 123.1, 121.3, 57.2, 50.3, 34.9, 33.8, 30.5, 25.3.

**HRMS (ESI):** calcd for C<sub>21</sub>H<sub>28</sub>N<sub>2</sub>O<sup>+</sup>, (M+H)<sup>+</sup>: 281.1648, found: 281.1644.

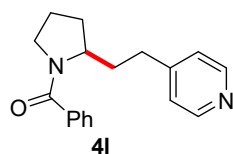

The reaction was conducted according to the general procedure using **1a** with CH<sub>3</sub>CN as the solvent. The reaction was run for 60 h, the desired product **4l** was purified by flash column chromatography with PE/EA (20:1) to afford **4l** (23.4 mg, 83% yield) as a colorless oil, 83% isolated yield.

**<sup>1</sup>H NMR (400 MHz, CDCl<sub>3</sub>):**  $\delta_H$  8.42 (d,  $J$  = 5.1 Hz, 2H), 7.42 (d,  $J$  = 7.2 Hz, 2H), 7.36 -7.27 (m, 3H), 7.13 (d,  $J$  = 5.0 Hz, 2H), 4.25 (d,  $J$  = 14.7 Hz, 1H), 3.39 (t,  $J$  = 6.5 Hz, 2H), 2.66 (t,  $J$  = 8.0 Hz, 2H), 2.38 - 2.27 (m, 1H), 2.091 2.03 (m, 1H), 1.85 (d,  $J$  = 10.3 Hz, 2H), 1.78 - 1.61 (m, 2H).

**<sup>13</sup>C NMR (101 MHz, CDCl<sub>3</sub>):**  $\delta_C$  170.4, 151.0, 149.8, 137.3, 130.2, 128.4, 127.4, 123.99, 57.1, 50.4, 34.3, 31.8, 30.6, 25.3.

**HRMS (ESI):** calcd for C<sub>21</sub>H<sub>28</sub>N<sub>2</sub>O<sup>+</sup>, (M+H)<sup>+</sup>: 281.1648, found: 281.1639.

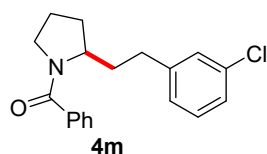

The reaction was conducted according to the general procedure using **1a** with CH<sub>3</sub>CN as the solvent. The reaction was run for 72 h, the desired product **4m** was purified by flash column chromatography with PE/EA (20:1) to afford **4m** (21.6 mg, 69% yield) as a colorless oil, 69% isolated yield.

**<sup>1</sup>H NMR (400 MHz, CDCl<sub>3</sub>):**  $\delta_H$  7.49 (d,  $J$  = 7.3 Hz, 2H), 7.44 -7.34 (m, 3H), 7.23 (s, 1H), 7.20 (d,  $J$  = 7.5 Hz, 1H), 7.16 (s, 2H), 4.34 (s, 1H), 3.52-3.36 (m, 2H), 2.70 (t,  $J$  = 6.8 Hz, 2H), 2.37 (dd,  $J$  = 10.1, 5.9 Hz, 1H), 2.18-2.07 (m, 1H), 1.92 (dd,  $J$  = 11.2, 5.3 Hz, 1H), 1.82-1.69 (m, 3H).

**<sup>13</sup>C NMR (101 MHz, CDCl<sub>3</sub>):**  $\delta_C$  170.2, 144.1, 137.5, 134.2, 130.1, 129.8, 128.6, 128.4, 127.5, 126.7, 126.2, 57.2, 50.3, 35.4, 32.2, 30.6, 25.3.

**HRMS (ESI):** calcd for C<sub>19</sub>H<sub>21</sub>ClNO<sup>+</sup>, (M+H)<sup>+</sup>: 314.1306, found: 314.1311.

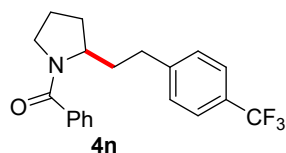

The reaction was conducted according to the general procedure using **1a** with CH<sub>3</sub>CN as the solvent. The reaction was run for 72 h, the desired product **4n** was purified by flash column chromatography with PE/EA (20:1) to afford **4n** (26.7 mg, 77% yield) as a colorless oil, 77% isolated yield.



**<sup>1</sup>H NMR (400 MHz, CDCl<sub>3</sub>):**  $\delta_H$  7.53 (d,  $J$  = 7.9 Hz, 2H), 7.47 (d,  $J$  = 7.2 Hz, 2H), 7.39 (dd,  $J$  = 12.6, 6.8 Hz, 5H), 4.34 (s, 1H), 3.45 (t,  $J$  = 6.6 Hz, 2H), 2.79 (t,  $J$  = 8.0 Hz, 2H), 2.45 - 2.33 (m, 1H), 2.15 (dd,  $J$  = 15.2, 8.5 Hz, 1H), 1.92 (dd,  $J$  = 10.9, 5.1 Hz, 1H), 1.77 (ddd,  $J$  = 18.9, 12.1, 6.4 Hz, 3H).

**<sup>13</sup>C NMR (101 MHz, CDCl<sub>3</sub>):**  $\delta_C$  170.2, 146.0, 137.3, 129.97, 128.7, 128.7, 128.3 (m), 128.2, 127.3, 125.3 (dd,  $J$  = 7.6, 3.9 Hz), 57.0, 50.2, 35.0, 32.2, 30.5, 25.2.

**<sup>19</sup>F NMR (376 MHz, CDCl<sub>3</sub>):**  $\delta_F$  -62.30.

**HRMS (ESI):** calcd for C<sub>20</sub>H<sub>21</sub>F<sub>3</sub>NO<sup>+</sup>, (M+H)<sup>+</sup>: 348.1570, found: 348.1568.

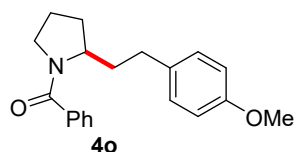

The reaction was conducted according to the general procedure using **1a** with CH<sub>3</sub>CN as the solvent. The reaction was run for 72 h, the desired product **4r** was purified by flash column chromatography with PE/EA (20:1) to afford **4r** (7.1 mg, 23% yield) as a colorless oil, 23% isolated yield.

**<sup>1</sup>H NMR (400 MHz, CDCl<sub>3</sub>):**  $\delta_H$  7.48 (d,  $J$  = 6.8 Hz, 1H), 7.39 (t,  $J$  = 6.1 Hz, 3H), 7.17 (d,  $J$  = 8.1 Hz, 2H), 6.89-6.78 (m, 2H), 6.70 (s, 1H), 4.33 (s, 1H), 3.54-3.24 (m, 2H), 2.66 (t,  $J$  = 7.4 Hz, 1H), 2.43- 2.30 (m, 1H), 2.12 (m, 1H), 1.90 (m, 1H), 1.74 (d,  $J$  = 5.7 Hz, 3H).

**<sup>13</sup>C NMR (101 MHz, CDCl<sub>3</sub>):**  $\delta_C$  170.1, 157.9, 137.6, 134.1, 129.99, 129.4, 128.3, 127.5, 113.9, 57.3, 55.4, 50.3, 35.7, 31.5, 30.5, 25.3.

**HRMS (ESI):** calcd for C<sub>20</sub>H<sub>24</sub>NO<sub>2</sub><sup>+</sup>, (M+H)<sup>+</sup>, 310.1802, found, 310.1809.

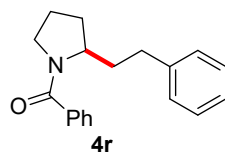

The reaction was conducted according to the general procedure using **1a** with CH<sub>3</sub>CN as the solvent. The reaction was run for 72 h, the desired product **4r** was purified by flash column chromatography with PE/EA (20:1) to afford **4r** (8.6 mg, 31% yield) as a colorless oil, 31% isolated yield.

**<sup>1</sup>H NMR (400 MHz, CDCl<sub>3</sub>):**  $\delta_H$  7.49 (d,  $J$  = 7.1 Hz, 2H), 7.39 (t,  $J$  = 5.9 Hz, 4H), 7.29 (d,  $J$  = 7.5 Hz, 1H), 7.25 - 7.22 (m, 1H), 7.21-7.09 (m, 2H), 4.35 (s, 1H), 3.44 (dd,  $J$  = 13.0, 6.4 Hz, 2H), 2.73 (t,  $J$  = 8.1 Hz, 2H), 2.45 - 2.34 (m, 1H), 2.20- 2.10 (m, 1H), 1.91 (dd,  $J$  = 15.8, 10.6 Hz, 1H), 1.83-1.69 (m, 3H).

**<sup>13</sup>C NMR (101 MHz, CDCl<sub>3</sub>):**  $\delta_C$  170.1, 142.1, 137.6, 130.0, 129.97, 128.5, 128.3, 127.5, 125.9, 57.3, 50.3, 35.6, 32.5, 30.5, 25.3.

**HRMS (ESI):** calcd for C<sub>19</sub>H<sub>22</sub>NO<sup>+</sup>, (M+H)<sup>+</sup>, 280.1696, found, 280.1690.

## 6. Synthetic applications

### a) Gram Scale-up Reaction

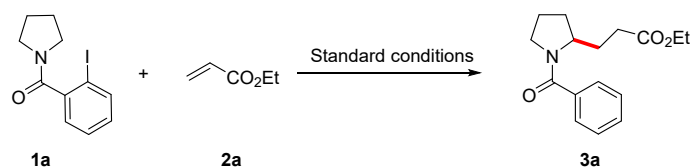

In a dried sealed tube, **1a** (3.3 mmol), **2a** (6.6 mmol), Ir(dFppy)<sub>2</sub>dtbpyPF<sub>6</sub> (1.0 mol %), DIPEA (13.2 mmol), Bu<sub>4</sub>NBr (6.6 mmol) were dissolved in CH<sub>3</sub>CN (33.0 mL). The flask was capped and degassed oxygen with N<sub>2</sub> for three times at -78 °C. And then, the reaction flask was exposed to 12 W\*2 blue LEDs at room temperature until the starting materials was completely consumed (monitored by TLC). After the reaction finished (96 h), the reaction solvent was distill under vacuum, the residue was purified by flash column chromatography on silica gel with a eluent of petroleum ether (PE) and ethyl acetate (EA) to give the desired products **3a** in 79% yield.

### b) Late-stage alkylation of complex molecules

#### Synthesis of **5a**:

**Synthesis of substrate Pregnenolone derivative:** Pregnenolone (632 mg, 2.0 mmol), Et<sub>3</sub>N (404 mg, 4 mmol) were added in DCM (20 mL) at 0-5 °C, acryloyl chloride (216 mg, 2.4 mmol) was added with dropwise. After that, the reaction was removed to room temperature, and stirring overnight at room temperature. When the starting material was completely consumed, 20 ml saturated NH<sub>4</sub>Cl was added, extracted with DCM (20 ml\*3), the combined phase was washed with brine, dried over Na<sub>2</sub>SO<sub>4</sub>, concentrated and purified by chromatography on silica gel to afford the desired substrate.

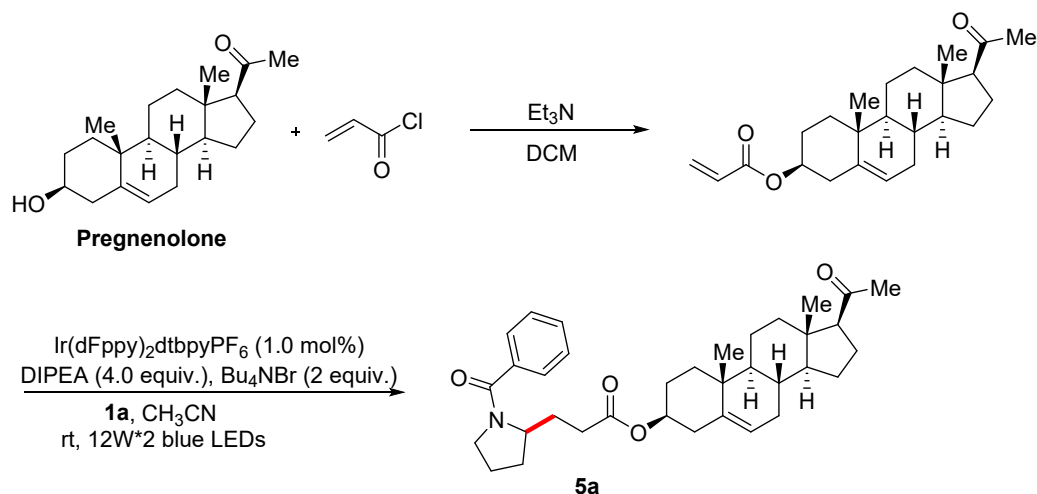

#### Characterization data of substrate:

**<sup>1</sup>H NMR (400 MHz, CDCl<sub>3</sub>):** δ<sub>H</sub> 6.38 (dd, *J* = 17.3, 1.4 Hz, 1H), 6.10 (dd, *J* = 17.3, 10.4 Hz, 1H), 5.80 (dd, *J* = 10.4, 1.4 Hz, 1H), 5.38 (d, *J* = 4.9 Hz, 1H), 4.69 (tdd, *J* = 11.1, 6.7, 4.4 Hz, 1H), 2.53 (t, *J* = 8.9 Hz, 1H), 2.36 (d, *J* = 7.1 Hz, 2H), 2.18 (dt, *J* = 20.2, 10.0 Hz, 1H), 2.12 (s, 3H), 2.01 (ddd, *J* = 17.4, 9.7, 5.9 Hz, 2H), 1.94-1.85 (m, 2H), 1.73-1.52 (m, 6H), 1.48 (dd, *J* = 16.4, 6.9 Hz, 2H), 1.28 – 1.11 (m, 3H), 1.03 (s, 4H), 0.63 (s, 3H).

$^{13}\text{C}$  NMR (101 MHz,  $\text{CDCl}_3$ ):  $\delta_{\text{C}}$  209.7, 165.8, 139.8, 130.5, 129.1, 122.6, 74.1, 63.8, 56.98, 50.0, 44.1, 38.9, 38.2, 37.1, 36.8, 31.96, 31.9, 31.7, 27.9, 24.6, 22.98, 21.2, 19.5, 13.4.

**Photoredox reaction:** In a dried sealed tube, **1a** (0.2 mmol), **Pregnenolone derivative** (0.1 mmol),  $\text{Ir}(\text{dFppy})_2\text{dtbpyPF}_6$  (1.0 mol %), DIPEA (0.4 mmol),  $\text{Bu}_4\text{NBr}$  (0.2 mmol) were dissolved in  $\text{CH}_3\text{CN}$  (1.0 mL). The flask was capped and degassed oxygen with  $\text{N}_2$  for three times at  $-78\text{ }^\circ\text{C}$ . And then, the reaction flask was exposed to 12 W\*2 blue LEDs at room temperature until the starting materials was completely consumed (monitored by TLC). After the reaction finished, the reaction solvent was distill under vacuum, the residue was purified by flash column chromatography on silica gel with a eluent of petroleum ether (PE) and ethyl acetate (EA) to give the desired products.

#### Characterization data of 5a:

$^1\text{H}$  NMR (400 MHz,  $\text{CDCl}_3$ ):  $\delta_{\text{H}}$  7.50 (d,  $J = 6.8$  Hz, 2H), 7.41-7.33 (m, 3H), 5.47-5.13 (m, 1H), 4.72 – 4.44 (m, 1H), 4.34 (s, 1H), 3.60-3.33 (m, 2H), 2.52 (t,  $J = 8.9$  Hz, 1H), 2.40 (dd,  $J = 15.5, 8.0$  Hz, 1H), 2.34-2.25 (m, 2H), 2.25-2.14 (m, 2H), 2.11 (s, 3H), 2.06-1.99 (m, 2H), 1.96 (s, 1H), 1.92-1.76 (m, 5H), 1.75-1.63 (m, 4H), 1.62-1.48 (m, 4H), 1.45 (t,  $J = 9.2$  Hz, 2H), 1.28- 1.20 (m, 1H), 1.20-1.10 (m, 2H), 1.04-0.94 (m, 4H), 0.62 (s, 3H).

$^{13}\text{C}$  NMR (101 MHz,  $\text{CDCl}_3$ ):  $\delta_{\text{C}}$  209.7, 173.0, 170.4, 139.8, 137.3, 130.1, 128.3, 127.5, 122.4, 73.96, 63.8, 56.95, 56.7, 50.2, 49.98, 44.1, 38.9, 38.1, 37.1, 36.7, 31.9, 31.9, 31.7, 30.3, 29.4, 27.8, 27.8, 25.1, 24.6, 22.9, 21.1, 19.4, 13.3.

HRMS (ESI): calcd for  $\text{C}_{35}\text{H}_{48}\text{NO}_4^+$ ,  $(\text{M}+\text{H})^+$ : 546.3578, found: 546.3582.

#### Synthesis of 5b:

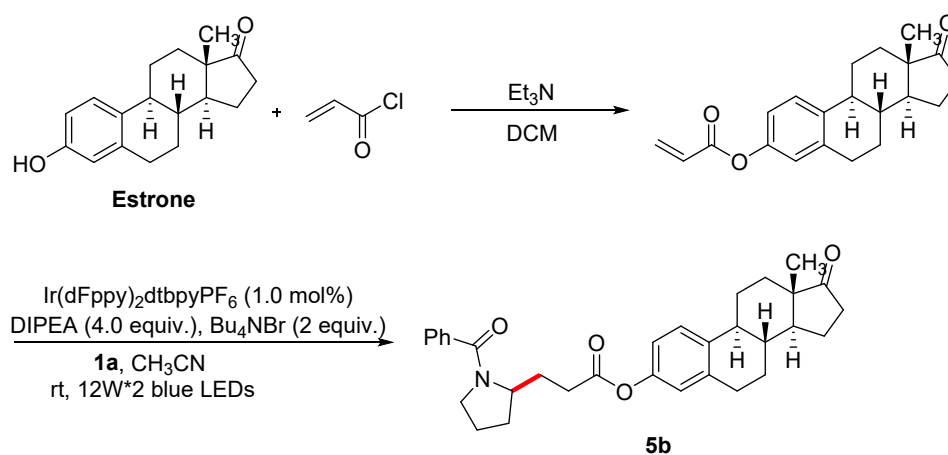

**Synthesis of substrate Estrone derivative:** Estrone (540 mg, 2.0 mmol),  $\text{Et}_3\text{N}$  (404 mg, 4 mmol) were added in DCM (20 mL) at  $0-5\text{ }^\circ\text{C}$ , acryloyl chloride (216 mg, 2.4 mmol) was added with dropwise. After that, the reaction was removed to room temperature, and stirring overnight at room temperature. When the starting material was completely consumed, 20 ml saturated was added, extracted with DCM (20 ml\*3), the combined phase was washed with brine, dried over  $\text{Na}_2\text{SO}_4$ , concentrated and purified by chromatography on silica gel to afford the desired product.

#### Characterization data of substrate:

$^1\text{H}$  NMR (400 MHz,  $\text{CDCl}_3$ ):  $\delta_{\text{H}}$  7.30 (d,  $J = 8.4$  Hz, 1H), 6.90 (dd,  $J = 8.4, 2.5$  Hz, 1H), 6.86 (d,  $J$

= 2.4 Hz, 1H), 6.59 (dd,  $J = 17.3, 1.3$  Hz, 1H), 6.31 (dd,  $J = 17.3, 10.4$  Hz, 1H), 6.00 (dd,  $J = 10.4, 1.3$  Hz, 1H), 2.96 – 2.88 (m, 2H), 2.51 (dd,  $J = 18.8, 8.5$  Hz, 1H), 2.45 - 2.38 (m, 1H), 2.35 - 2.25 (m, 1H), 2.05 (dddd,  $J = 12.8, 12.0, 9.5, 6.5$  Hz, 3H), 1.73-1.38 (m, 7H), 0.91 (s, 3H),  
 $^{13}\text{C NMR}$  (101 MHz,  $\text{CDCl}_3$ ):  $\delta_{\text{C}}$  220.9, 165.0, 148.6, 138.2, 137.6, 132.6, 128.2, 126.6, 121.7, 118.8, 50.6, 48.1, 44.3, 38.1, 36.0, 31.7, 29.5, 26.5, 25.9, 21.7, 13.97.

**Photoredox reaction:** In a dried sealed tube, **1a** (0.2 mmol), **Estrone derivative** (0.1 mmol),  $\text{Ir}(\text{dFppy})_2\text{dtbpyPF}_6$  (1.0 mol %), DIPEA (0.4 mmol),  $\text{Bu}_4\text{NBr}$  (0.2 mmol) were dissolved in  $\text{CH}_3\text{CN}$  (1.0 mL). The flask was capped and degassed oxygen with  $\text{N}_2$  for three times at  $-78$  °C. And then, the reaction flask was exposed to 12 W\*2 blue LEDs at room temperature until the starting materials was completely consumed (monitored by TLC). After the reaction finished, the reaction solvent was distill under vacuum, the residue was purified by flash column chromatography on silica gel with a eluent of petroleum ether (PE) and ethyl acetate (EA) to give the desired product **5b**.

**Characterization data of 5b:**

$^1\text{H NMR}$  (400 MHz,  $\text{CDCl}_3$ ):  $\delta_{\text{H}}$  7.52 (d,  $J = 7.3$  Hz, 2H), 7.43 - 7.34 (m, 3H), 7.25 (d,  $J = 6.6$  Hz, 1H), 6.84 (d,  $J = 8.4$  Hz, 1H), 6.79 (s, 1H), 4.46 (dd,  $J = 12.6, 6.4$  Hz, 1H), 3.46 (ddd,  $J = 22.5, 14.0, 7.2$  Hz, 2H), 2.93-2.82 (m, 2H), 2.69 (tt,  $J = 16.2, 8.0$  Hz, 2H), 2.50 (dd,  $J = 18.8, 8.6$  Hz, 1H), 2.42 -2.36 (m, 1H), 2.35-2.22 (m, 2H), 2.20-2.09 (m, 2H), 2.08-2.03 (m, 1H), 2.02-1.92 (m, 4H), 1.82-1.69 (m, 2H), 1.63-1.59 (m, 1H), 1.59-1.47 (m, 4H), 1.45-1.39 (m, 1H), 0.90 (s, 3H).

$^{13}\text{C NMR}$  (101 MHz,  $\text{CDCl}_3$ ):  $\delta_{\text{C}}$  220.98, 172.5, 170.6, 148.7, 138.1, 137.4, 137.3, 130.1, 128.3, 127.5, 126.5, 121.8, 118.9, 56.7, 50.6, 50.2, 48.1, 44.3, 38.1, 35.99, 31.7, 31.5, 30.5, 29.5, 26.5, 25.9, 25.1, 21.7, 13.96.

**HRMS (ESI):** calcd for  $\text{C}_{32}\text{H}_{38}\text{NO}_4^+$ , (M+H) $^+$ : 500.2795, found: 500.2800.

**Synthesis of 5c:**

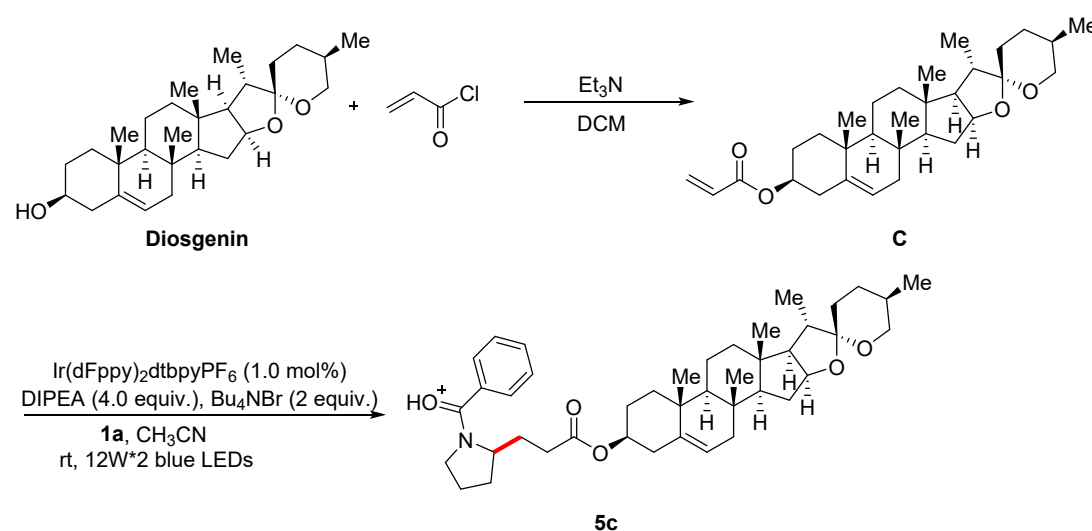

**Synthesis of substrate Diosgenin derivative:** Diosgenin (856 mg, 2.0 mmol),  $\text{Et}_3\text{N}$  (404 mg, 4 mmol) were added in DCM (20 mL) at  $0-5$  °C, acryloyl chloride (216 mg, 2.4 mmol) was added with dropwise. After that, the reaction was removed to room temperature, and stirring overnight at room temperature. When the starting material was completely consumed, 20 ml saturated was added, extracted with DCM (20 ml\*3), the combined phase was washed with brine, dried over  $\text{Na}_2\text{SO}_4$ , concentrated and purified by

chromatography on silica gel to afford the desired substrate.

**Characterization data of substrate:**

**<sup>1</sup>H NMR (400 MHz, CDCl<sub>3</sub>):**  $\delta_H$  6.38 (dd,  $J = 17.3, 1.3$  Hz, 1H), 6.10 (dd,  $J = 17.3, 10.4$  Hz, 1H), 5.80 (dd,  $J = 10.4, 1.2$  Hz, 1H), 5.39 (d,  $J = 4.7$  Hz, 1H), 4.75-4.60 (m, 1H), 4.41 (dd,  $J = 14.9, 7.5$  Hz, 1H), 3.47 (dd,  $J = 10.1, 3.2$  Hz, 1H), 3.37 (t,  $J = 10.9$  Hz, 1H), 2.37 (d,  $J = 6.2$  Hz, 2H), 1.99 (dt,  $J = 12.3, 5.4$  Hz, 2H), 1.94-1.82 (m, 3H), 1.81-1.72 (m, 2H), 1.70-1.55 (m, 7H), 1.54-1.40 (m, 3H), 1.35-1.24 (m, 2H), 1.23-1.06 (m, 4H), 1.04 (d,  $J = 10.0$  Hz, 3H), 0.99 (dd,  $J = 11.2, 7.0$  Hz, 3H), 0.79 (d,  $J = 4.8$  Hz, 6H).

**<sup>13</sup>C NMR (101 MHz, CDCl<sub>3</sub>):**  $\delta_C$  165.7, 139.8, 130.4, 129.1, 122.6, 109.4, 80.9, 74.1, 66.9, 62.2, 56.6, 50.1, 41.7, 40.4, 39.8, 38.2, 37.1, 36.9, 32.2, 31.95, 31.5, 30.4, 28.9, 27.9, 20.9, 19.5, 17.3, 16.4, 14.6.

**Photoredox reaction:** In a dried sealed tube, **1a** (0.2 mmol), **Diosgenin derivative** (0.1 mmol), Ir(dFppy)<sub>2</sub>dtbpyPF<sub>6</sub> (1.0 mol %), DIPEA (0.4 mmol), Bu<sub>4</sub>NBr (0.2 mmol) were dissolved in CH<sub>3</sub>CN (1.0 mL). The flask was capped and degassed oxygen with N<sub>2</sub> for three times at -78 °C. And then, the reaction flask was exposed to 12 W\*2 blue LEDs at room temperature until the starting materials was completely consumed (monitored by TLC). After the reaction finished, the reaction solvent was distill under vacuum, the residue was purified by flash column chromatography on silica gel with a eluent of petroleum ether (PE) and ethyl acetate (EA) to give the desired product **5c**.

**Characterization data of 5c:**

**<sup>1</sup>H NMR (400 MHz, CDCl<sub>3</sub>):**  $\delta_H$  7.50 (d,  $J = 6.4$  Hz, 2H), 7.42-7.33 (m, 3H), 5.42-5.22 (m, 1H), 4.70 - 4.51 (m, 1H), 4.38 (dt,  $J = 17.9, 6.6$  Hz, 2H), 3.57-3.32 (m, 4H), 2.40 (dd,  $J = 15.7, 8.5$  Hz, 2H), 2.33 - 2.19 (m, 3H), 2.13-2.05 (m, 1H), 2.02-1.92 (m, 3H), 1.85 (td,  $J = 12.5, 7.0$  Hz, 4H), 1.71 (ddd,  $J = 16.4, 12.5, 6.4$  Hz, 6H), 1.60 (dd,  $J = 14.2, 9.7$  Hz, 5H), 1.54-1.37 (m, 4H), 1.27 (dt,  $J = 14.2, 6.8$  Hz, 2H), 1.18 (dd,  $J = 12.6, 4.7$  Hz, 1H), 1.14-1.05 (m, 2H), 1.01 (s, 3H), 0.95 (dd,  $J = 12.4, 6.1$  Hz, 4H), 0.78 ( $J = 4.5$  Hz, 6H).

**<sup>13</sup>C NMR (101 MHz, CDCl<sub>3</sub>):**  $\delta_C$  173.0, 170.4, 139.9, 137.3, 130.1, 128.3, 127.5, 122.4, 109.4, 80.9, 74.0, 66.95, 62.2, 56.7, 56.6, 50.2, 50.1, 41.7, 40.4, 39.8, 38.2, 38.2, 37.1, 36.8, 32.2, 31.95, 31.7, 31.5, 30.4, 30.3, 29.4, 28.9, 27.8, 25.1, 20.9, 19.5, 17.3, 16.4, 14.6.

**HRMS (ESI):** calcd for C<sub>42</sub>H<sub>60</sub>NO<sub>5</sub><sup>+</sup>, (M+H)<sup>+</sup>: 658.4466, found: 658.4474.

**Synthesis of 5d:**

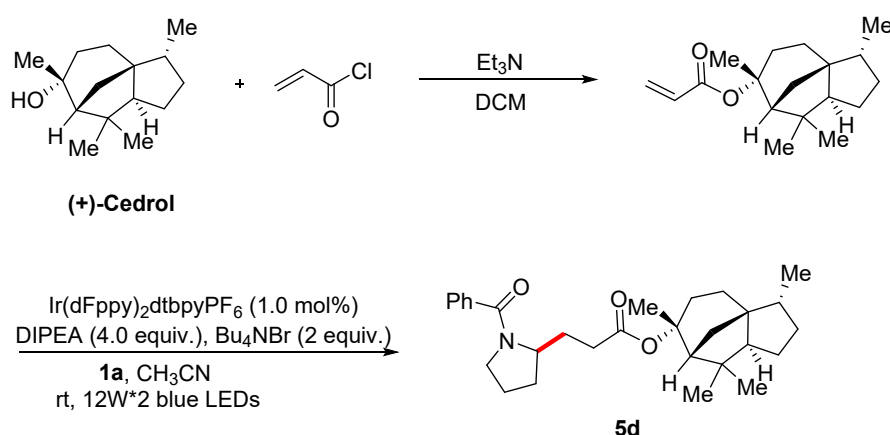

**Synthesis of substrate (+)-Cedrol derivative:** (+)-Cedrol (444 mg, 2.0 mmol), Et<sub>3</sub>N (404 mg, 4 mmol) were added in DCM (20 mL) at 0-5 °C, acryloyl chloride (216 mg, 2.4 mmol) was added with dropwise.

After that, the reaction was removed to room temperature, and stirring overnight at room temperature. When the starting material was completely consumed, 20 ml saturated was added, extracted with DCM (20 ml\*3), the combined phase was washed with brine, dried over Na<sub>2</sub>SO<sub>4</sub>, concentrated and purified by chromatography on silica gel to afford the desired substrate.

**Characterization data of substrate:**

**<sup>1</sup>H NMR (400 MHz, CDCl<sub>3</sub>):** δ<sub>H</sub> 6.27 (dd, *J* = 17.3, 1.6 Hz, 1H), 6.01 (dd, *J* = 17.3, 10.3 Hz, 1H), 5.70 (dd, *J* = 10.3, 1.6 Hz, 1H), 2.44 (d, *J* = 5.2 Hz, 1H), 2.07 (ddt, *J* = 13.5, 5.6, 1.6 Hz, 1H), 2.03 – 1.92 (m, 1H), 1.85 (ddd, *J* = 22.6, 14.1, 7.0 Hz, 2H), 1.70-1.61 (m, 2H), 1.57 (s, 3H), 1.51 (ddd, *J* = 14.6, 7.3, 4.9 Hz, 1H), 1.47-1.42 (m, 1H), 1.42-1.31 (m, 3H), 1.30-1.20 (m, 1H), 1.13 (s, 3H), 0.96 (s, 3H), 0.83 (d, *J* = 7.1 Hz, 3H).

**<sup>13</sup>C NMR (101 MHz, CDCl<sub>3</sub>):** δ<sub>C</sub> 165.5, 130.8, 129.3, 86.7, 56.97, 56.9, 54.1, 43.6, 41.4, 41.1, 37.1, 33.3, 31.4, 28.6, 27.2, 26.0, 25.4, 15.6.

**Photoredox reaction:** In a dried sealed tube, **1a** (0.2 mmol), (+)-Cedrol derivative (0.1 mmol), Ir(dFppy)<sub>2</sub>dtbpyPF<sub>6</sub> (1.0 mol %), DIPEA (0.4 mmol), Bu<sub>4</sub>NBr (0.2 mmol) were dissolved in CH<sub>3</sub>CN (1.0 mL). The flask was capped and degassed oxygen with N<sub>2</sub> for three times at -78 °C. And then, the reaction flask was exposed to 12 W\*2 blue LEDs at room temperature until the starting materials was completely consumed (monitored by TLC). After the reaction finished, the reaction solvent was distill under vacuum, the residue was purified by flash column chromatography on silica gel with a eluent of petroleum ether (PE) and ethyl acetate (EA) to give the desired product **5d**.

**Characterization data of 5d:**

**<sup>1</sup>H NMR (400 MHz, CDCl<sub>3</sub>):** δ<sub>H</sub> 7.48 (d, *J* = 6.4 Hz, 2H), 7.41-7.32 (m, 3H), 4.31 (s, 1H), 3.55-3.29 (m, 2H), 2.38 (d, *J* = 4.4 Hz, 1H), 2.34-2.15 (m, 3H), 2.05 (dd, *J* = 12.8, 6.9 Hz, 2H), 1.97-1.87 (m, 3H), 1.87-1.80 (m, 2H), 1.79-1.72 (m, 2H), 1.67-1.58 (m, 3H), 1.56-1.45 (m, 4H), 1.44-1.28 (m, 5H), 1.28-1.23 (m, 1H), 1.15 (s, 2H), 0.95 (s, 3H), 0.81 (d, *J* = 7.1 Hz, 3H).

**<sup>13</sup>C NMR (101 MHz, CDCl<sub>3</sub>):** δ<sub>C</sub> 172.6, 170.3, 137.4, 129.95, 128.3, 127.4, 86.5, 57.0, 56.7, 54.0, 50.1, 43.5, 41.4, 41.1, 37.0, 33.2, 32.7, 31.3, 30.3, 29.3, 28.6, 27.2, 25.9, 25.4, 25.1, 15.6.

**HRMS (ESI):** calcd for C<sub>29</sub>H<sub>42</sub>NO<sub>3</sub><sup>+</sup>, (M+H)<sup>+</sup>: 452.3159, found: 452.3161.

**Synthesis of 5e:**

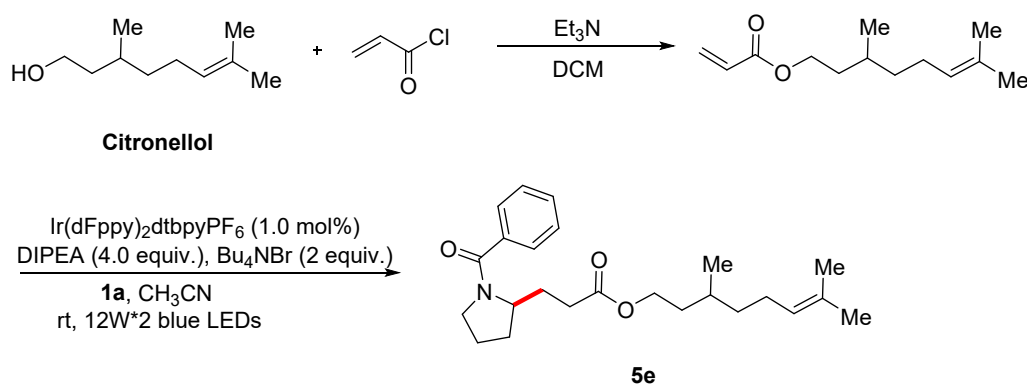

**Synthesis of substrate Citronellol derivative:** Citronellol (312 mg, 2.0 mmol), Et<sub>3</sub>N (404 mg, 4 mmol) were added in DCM (20 mL) at 0-5 °C, acryloyl chloride (216 mg, 2.4 mmol) was added with dropwise. After that, the reaction was removed to room temperature, and stirring overnight at room temperature.

When the starting material was completely consumed, 20 ml saturated was added, extracted with DCM (20 ml\*3), the combined phase was washed with brine, dried over Na<sub>2</sub>SO<sub>4</sub>, concentrated and purified by chromatography on silica gel to afford the desired substrate.

**Characterization data of substrate:**

**<sup>1</sup>H NMR (400 MHz, CDCl<sub>3</sub>):** δ<sub>H</sub> 6.39 (dd, *J* = 17.3, 1.5 Hz, 1H), 6.12 (dd, *J* = 17.3, 10.4 Hz, 1H), 5.81 (dd, *J* = 10.4, 1.5 Hz, 1H), 5.15-5.02 (m, 1H), 4.26-4.09 (m, 2H), 2.08-1.88 (m, 2H), 1.78-1.69 (m, 1H), 1.68 (s, 3H), 1.59-1.50 (m, 2H), 1.50-1.40 (m, 1H), 1.36 (ddd, *J* = 8.7, 6.4, 3.2 Hz, 1H), 1.28- 1.16 (m, 2H), 0.94 (t, *J* = 6.8 Hz, 3H), 0.90-0.82 (m, 1H).

**<sup>13</sup>C NMR (101 MHz, CDCl<sub>3</sub>):** δ<sub>C</sub> 166.5, 131.5, 130.5, 128.8, 124.7, 63.3, 37.1, 35.6, 29.7, 25.9, 25.5, 19.6, 17.8.

**Photoredox reaction:** In a dried sealed tube, **1a** (0.2 mmol), **Citronellol derivative** (0.1 mmol), Ir(dFppy)<sub>2</sub>dtbpyPF<sub>6</sub> (1.0 mol %), DIPEA (0.4 mmol), Bu<sub>4</sub>NBr (0.2 mmol) were dissolved in CH<sub>3</sub>CN (1.0 mL). The flask was capped and degassed oxygen with N<sub>2</sub> for three times at -78 °C. And then, the reaction flask was exposed to 12 W\*2 blue LEDs at room temperature until the starting materials was completely consumed (monitored by TLC). After the reaction finished, the reaction solvent was distill under vacuum, the residue was purified by flash column chromatography on silica gel with a eluent of petroleum ether (PE) and ethyl acetate (EA) to give the desired product **5e**.

**Characterization data of 5e:**

**<sup>1</sup>H NMR (400 MHz, CDCl<sub>3</sub>):** δ<sub>H</sub> 7.49 (d, *J* = 7.1 Hz, 2H), 7.41-7.34 (m, 3H), 5.07 (t, *J* = 7.1 Hz, 1H), 4.41-4.23 (m, 1H), 4.11 (dd, *J* = 14.1, 7.0 Hz, 2H), 3.61-3.33 (m, 2H), 2.42 (dd, *J* = 16.0, 9.3 Hz, 2H), 2.28-2.15 (m, 1H), 2.08 (dd, *J* = 12.3, 6.0 Hz, 1H), 2.01-1.85 (m, 4H), 1.74 (dd, *J* = 13.9, 6.3 Hz, 2H), 1.67 (s, 4H), 1.59 (s, 3H), 1.52 (dd, *J* = 12.6, 5.9 Hz, 1H), 1.41 (dd, *J* = 7.7, 4.5 Hz, 1H), 1.32 (ddd, *J* = 9.1, 6.7, 3.6 Hz, 1H), 1.20-1.12 (m, 1H), 0.89 (d, *J* = 6.5 Hz, 3H).

**<sup>13</sup>C NMR (101 MHz, CDCl<sub>3</sub>):** δ<sub>C</sub> 173.7, 170.4, 137.3, 131.4, 130.1, 128.3, 127.5, 124.7, 63.2, 56.7, 50.2, 37.1, 35.5, 31.4, 30.3, 29.6, 29.4, 25.8, 25.5, 25.1, 19.5, 17.8.

**HRMS (ESI):** calcd for C<sub>24</sub>H<sub>36</sub>NO<sub>3</sub><sup>+</sup>, (M+H)<sup>+</sup>, 386.2690, found, 386.2697.

**Synthesis of 5f:**

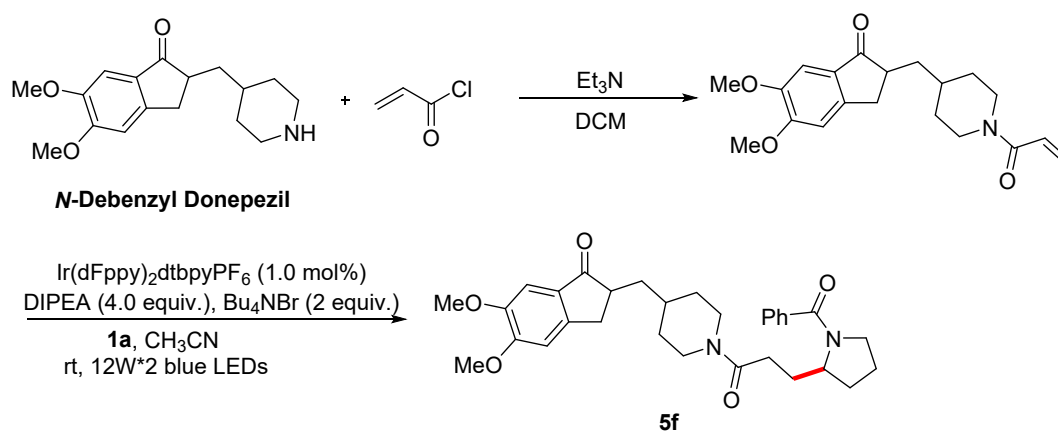

**Synthesis of substrate N-Debenzyl Donepezil derivative:** N-Debenzyl Donepezil (578 mg, 2.0 mmol), Et<sub>3</sub>N (404 mg, 4 mmol) were added in DCM (20 mL) at 0-5 °C, acryloyl chloride (216 mg, 2.4 mmol) was added with dropwise. After that, the reaction was removed to room temperature, and stirring

overnight at room temperature. When the starting material was completely consumed, 20 ml saturated was added, extracted with DCM (20 ml\*3), the combined phase was washed with brine, dried over Na<sub>2</sub>SO<sub>4</sub>, concentrated and purified by chromatography on silica gel to afford the desired product.

**Characterization data of substrate:**

**<sup>1</sup>H NMR (400 MHz, CDCl<sub>3</sub>):**  $\delta_H$  7.11 (s, 1H), 6.82 (s, 1H), 6.54 (dd,  $J = 16.8, 10.6$  Hz, 1H), 6.20 (dd,  $J = 16.8, 2.0$  Hz, 1H), 5.61 (dd,  $J = 10.6, 2.0$  Hz, 1H), 4.61 (d,  $J = 11.9$  Hz, 1H), 3.96 (s, 1H), 3.91 (s, 3H), 3.85 (s, 3H), 3.22 (dd,  $J = 17.4, 8.0$  Hz, 1H), 3.02 (t,  $J = 12.6$  Hz, 1H), 2.73-2.53 (m, 3H), 1.85 (dd,  $J = 9.0, 4.3$  Hz, 1H), 1.76 (d,  $J = 8.8$  Hz, 3H), 1.33 (dd,  $J = 16.5, 10.0$  Hz, 1H), 1.23-1.09 (m, 2H).

**<sup>13</sup>C NMR (101 MHz, CDCl<sub>3</sub>):**  $\delta_C$  207.3, 165.4, 155.6, 149.5, 148.6, 129.2, 128.0, 127.2, 107.4, 104.4, 56.3, 56.1, 46.1, 45.0 (d,  $J = 22.3$  Hz), 42.3, 38.5 (d,  $J = 24.0$  Hz), 34.6 (d,  $J = 29.6$  Hz), 33.8-32.9 (m), 32.5 (d,  $J = 18.0$  Hz), 31.43.

**Photoredox reaction:** In a dried sealed tube, **1a** (0.2 mmol), *N*-Debenzyl Donepezil derivative (0.1 mmol), Ir(dFppy)<sub>2</sub>dtbpyPF<sub>6</sub> (1.0 mol %), DIPEA (0.4 mmol), Bu<sub>4</sub>NBr (0.2 mmol) were dissolved in CH<sub>3</sub>CN (1.0 mL). The flask was capped and degassed oxygen with N<sub>2</sub> for three times at -78 °C. And then, the reaction flask was exposed to 12 W\*2 blue LEDs at room temperature until the starting materials was completely consumed (monitored by TLC). After the reaction finished, the reaction solvent was distilled under vacuum, the residue was purified by flash column chromatography on silica gel with a eluent of petroleum ether (PE) and ethyl acetate (EA) to give the desired products.

**Characterization data of 5f:**

**<sup>1</sup>H NMR (400 MHz, CDCl<sub>3</sub>):**  $\delta_H$  7.48 (s, 2H), 7.41-7.31 (m, 3H), 7.16 (s, 1H), 6.85 (s, 1H), 4.62 (d,  $J = 9.4$  Hz, 1H), 4.45-4.34 (m, 1H), 3.95 (s, 3H), 3.90 (s, 3H), 3.54-3.44 (m, 1H), 3.41-3.31 (m, 1H), 3.23 (dd,  $J = 14.9, 5.5$  Hz, 1H), 2.99 (t,  $J = 11.7$  Hz, 1H), 2.73-2.62 (m, 2H), 2.57-2.51 (m, 1H), 2.48-2.38 (m, 1H), 2.18 (d,  $J = 3.9$  Hz, 1H), 2.11-2.03 (m, 1H), 1.95 (dd,  $J = 12.0, 5.9$  Hz, 1H), 1.84 (dd,  $J = 17.7, 4.6$  Hz, 2H), 1.79-1.68 (m, 7H), 1.35-1.26 (m, 1H), 1.24-1.07 (m, 2H).

**<sup>13</sup>C NMR (101 MHz, CDCl<sub>3</sub>):**  $\delta_C$  207.5, 171.1, 170.4, 155.6, 149.5, 148.7, 137.3, 129.9, 129.2, 128.3, 127.3, 107.4, 104.4, 56.85 (d,  $J = 5.6$  Hz), 56.3, 56.1, 49.9, 45.9 (d,  $J = 8.6$  Hz), 45.3-44.96, 41.9 (d,  $J = 6.8$  Hz), 38.7-38.4 (m), 34.8-34.6 (m), 33.5-33.2 (m), 32.6-32.2 (m), 31.5, 30.7, 30.5, 30.1, 24.9.

**HRMS (ESI):** calcd for C<sub>31</sub>H<sub>39</sub>N<sub>2</sub>O<sub>5</sub><sup>+</sup>, (M+H)<sup>+</sup>, 519.2853, found, 519.2849.

## 7. Mechanistic Studies



### a) Control experiment

To illustrate the mechanism, the control experiment were conducted: In a dried sealed tube, **8** (0.1 mmol), **2a** (0.2 mmol), Ir(dFppy)<sub>2</sub>dtbpyPF<sub>6</sub> (1.0 mol %), DIPEA (0.4 mmol), Bu<sub>4</sub>NBr (0.2 mmol) were dissolved in CH<sub>3</sub>CN (1.0 mL). The flask was capped and degassed oxygen with N<sub>2</sub> for three times at -78 °C. Then, the reaction flask was exposed to 12 W\*2 blue leds until full completely consumed (monitored by TLC) and quenched with 4 mL saturated NH<sub>4</sub>Cl. The mixture was extracted with DCM (5 mL\*3). The combined solvent were dried over Na<sub>2</sub>SO<sub>4</sub> and filtered. The filtrate was concentrated and purification by chromatography on silica gel with a eluent of petroleum ether (PE) and ethyl acetate (EA) to afford the alkylation product **3a** in 0% yield, which demonstrate the activation of C-I bond are crucial to the successful transformation of the procedure.

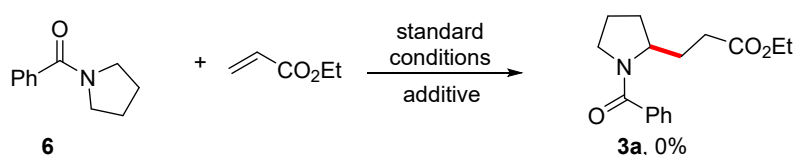

### b) Radical inhibition experiments

In a dried sealed tube, **1a** (0.1 mmol), **2a** (0.2 mmol), Ir(dFppy)<sub>2</sub>dtbpyPF<sub>6</sub> (1.0 mol %), DIPEA (0.4 mmol), Bu<sub>4</sub>NBr (0.2 mmol), TEMPO (2,2,6,6-tetramethyl-1-piperidinyloxy) (0.2 mmol) were dissolved in CH<sub>3</sub>CN (1.0 mL). The flask was capped and degassed oxygen with N<sub>2</sub> for three times at -78 °C. And then, the reaction flask was exposed to 12 W\*2 blue LEDs at room temperature until the starting materials was completely consumed (monitored by TLC). After the reaction finished, the reaction solvent was distill under vacuum and filtered with an inch of silica gel. Subsequently, the reaction mixture was detected only trace of desired product **3a** on GC-MS, with 5% isolated yield. When the inhibitor BHT (2,6-di-tert-butyl-4-methylphenol) (0.2 mmol) was used, the alkylation process was completely inhibited, which indicate the novel transformation was radical intermediate involved through a single-electron transfer.

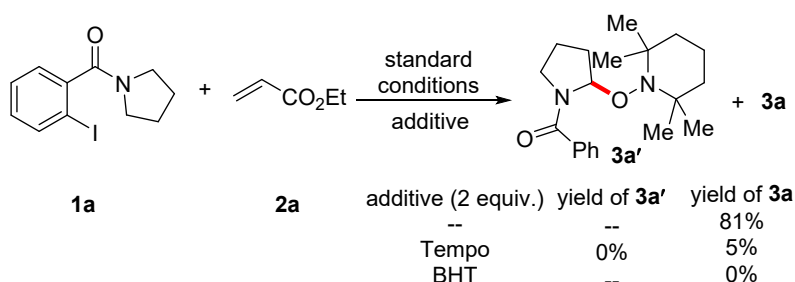

### c) Deuterium labeling experiment

To illustrate the mechanism, the deuterium labeling experiments were conducted: In a dried sealed tube, **d<sub>2</sub>-1j** (0.1 mmol), **2a** (0.2 mmol), Ir(dFppy)<sub>2</sub>dtbpyPF<sub>6</sub> (1.0 mol %), DIPEA (0.4 mmol), Bu<sub>4</sub>NBr (0.2 mmol) were dissolved in CH<sub>3</sub>CN (1.0 mL). The flask was capped and degassed oxygen with N<sub>2</sub> for three times at -78 °C. Then, the reaction flask was exposed to 12 W\*2 blue leds until full completely consumed (monitored by TLC) and quenched with 4 mL saturated NH<sub>4</sub>Cl. The mixture was extracted with DCM (5 mL\*3). The combined solvent were dried over Na<sub>2</sub>SO<sub>4</sub> and filtered. The filtrate was concentrated and purification by chromatography on silica gel with a eluent of petroleum ether (PE) and ethyl acetate (EA) to afford the alkylation product **d<sub>2</sub>-3j** in 34% yield. <sup>1</sup>H NMR (400 MHz, CDCl<sub>3</sub>): δ<sub>H</sub> 7.32-7.27 (m, 3H), 7.22 (dt, *J* = 7.5, 4.9 Hz, 1H), 7.15 (d, *J* = 7.4 Hz, 1H), 7.00 (t, *J* = 7.2 Hz, 1H), 6.82 (t, *J* = 7.6 Hz, 1H),

6.51 (d,  $J = 7.4$  Hz, 1H), 4.17-4.05 (m, 2H), 2.80 (t,  $J = 6.8$  Hz, 2H), 2.52 – 2.32 (m, 3H), 1.88 (ddd,  $J = 15.5, 9.8, 5.8$  Hz, 1H), 1.78 (ddd,  $J = 13.8, 9.8, 6.3$  Hz, 1H), 1.73-1.64 (m, 1H), 1.25 (dd,  $J = 8.6, 5.7$  Hz, 3H).

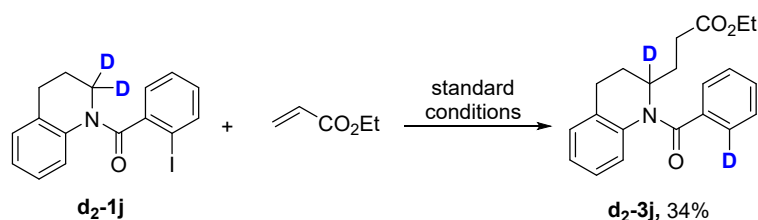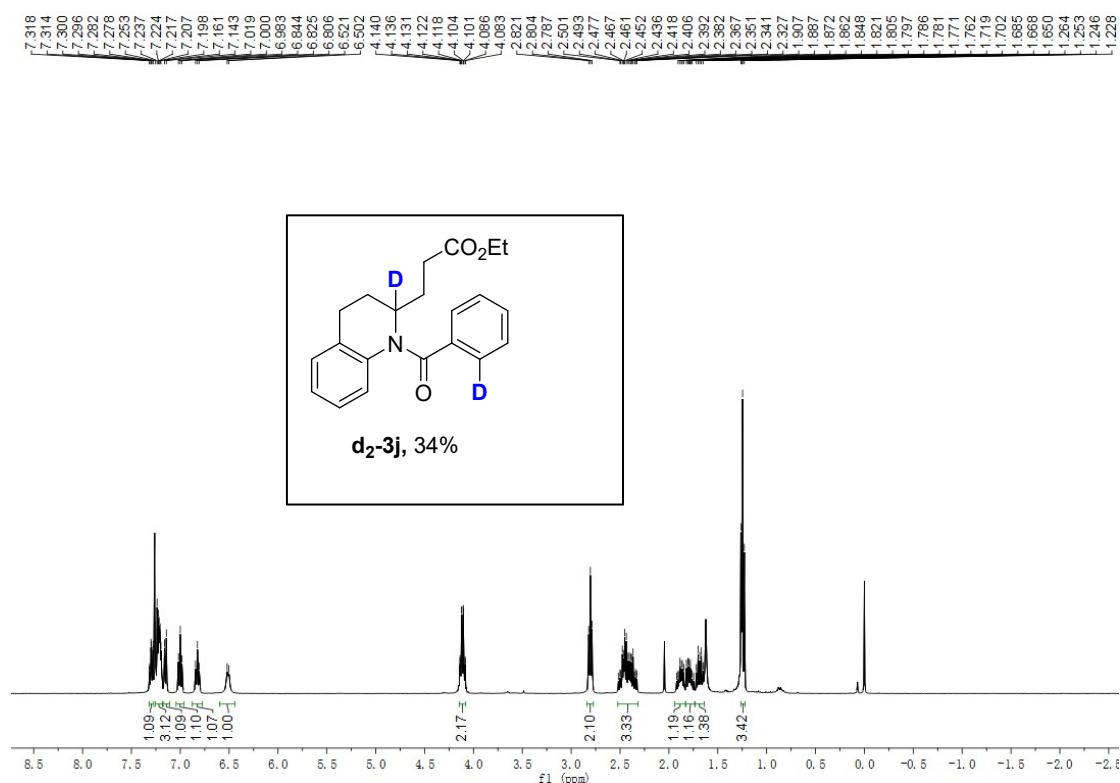

#### d) Deuterium labeling experiment to rule out 1,5-HAT of intermolecular

In a dried sealed tube, **1a** (0.1 mmol), **d<sub>2</sub>-1j** (0.1 mmol), **2a** (0.4 mmol), Ir(dFppy)<sub>2</sub>dtbpyPF<sub>6</sub> (2.0 mol %), DIPEA (0.8 mmol), Bu<sub>4</sub>NBr (0.4 mmol) were dissolved in CH<sub>3</sub>CN (1.0 mL). The flask was capped and degassed oxygen with N<sub>2</sub> for three times at -78 °C. Then, the reaction flask was exposed to 12 W\*2 blue leds until full completely consumed (monitored by TLC) and quenched with 4 mL saturated NH<sub>4</sub>Cl. The mixture was extracted with DCM (5 mL\*3). The combined solvent were dried over Na<sub>2</sub>SO<sub>4</sub> and filtered. The filtrate was concentrated and purification by chromatography on silica gel with a eluent of petroleum ether (PE) and ethyl acetate (EA) to afford the alkylation product **3a** and **d<sub>2</sub>-3j** in 74% and 20% yields respectively, without finding the intermolecular 1,5-HAT product.

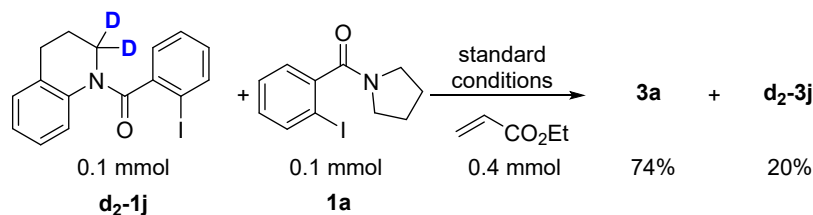

### e) Deuterium labeling experiment to evaluate the KIE value

To illustrate the mechanism, the deuterium labeling experiments were conducted: In a dried sealed tube, **d<sub>2</sub>-1j** (0.1 mmol), **1j** (0.1 mmol), **2a** (0.4 mmol), Ir(dFppy)<sub>2</sub>dtbpyPF<sub>6</sub> (1.0 mol %), DIPEA (0.4 mmol), Bu<sub>4</sub>NBr (0.4 mmol) were dissolved in CH<sub>3</sub>CN (1.0 mL). The flask was capped and degassed oxygen with N<sub>2</sub> for three times at -78 °C. Then, the reaction flask was exposed to 12 W\*2 blue leds until full completely consumed (monitored by TLC) and quenched with 4 mL saturated NH<sub>4</sub>Cl. The mixture was extracted with DCM (5 mL\*3). The combined solvent were dried over Na<sub>2</sub>SO<sub>4</sub> and filtered. The filtrate was concentrated and purification by chromatography on silica gel with a eluent of petroleum ether (PE) and ethyl acetate (EA) to afford the alkylation product **d<sub>2</sub>-3j** and **3j** in 25% yield. <sup>1</sup>H NMR (400 MHz, CDCl<sub>3</sub>): δ<sub>H</sub> 7.25-7.10 (m, 4H), 7.09-7.04 (m, 1H), 6.93 (td, *J* = 7.5, 1.1 Hz, 1H), 6.75 (t, *J* = 7.2 Hz, 1H), 6.44 (d, *J* = 7.7 Hz, 1H), 4.90-4.75 (m, 0.47H), 4.14-3.97 (m, 2H), 2.73 (t, *J* = 6.8 Hz, 1H), 2.48- 2.20 (m, 3H), 1.91-1.66 (m, 2H), 1.66-1.55 (m, 1H), 1.17 (t, *J* = 7.1 Hz, 3H).

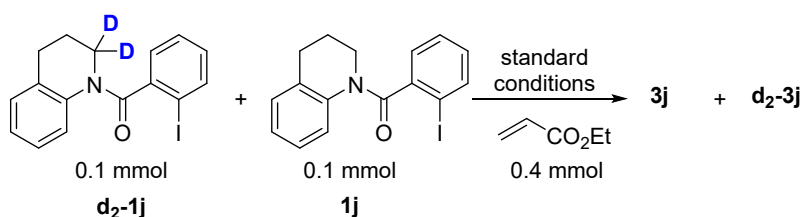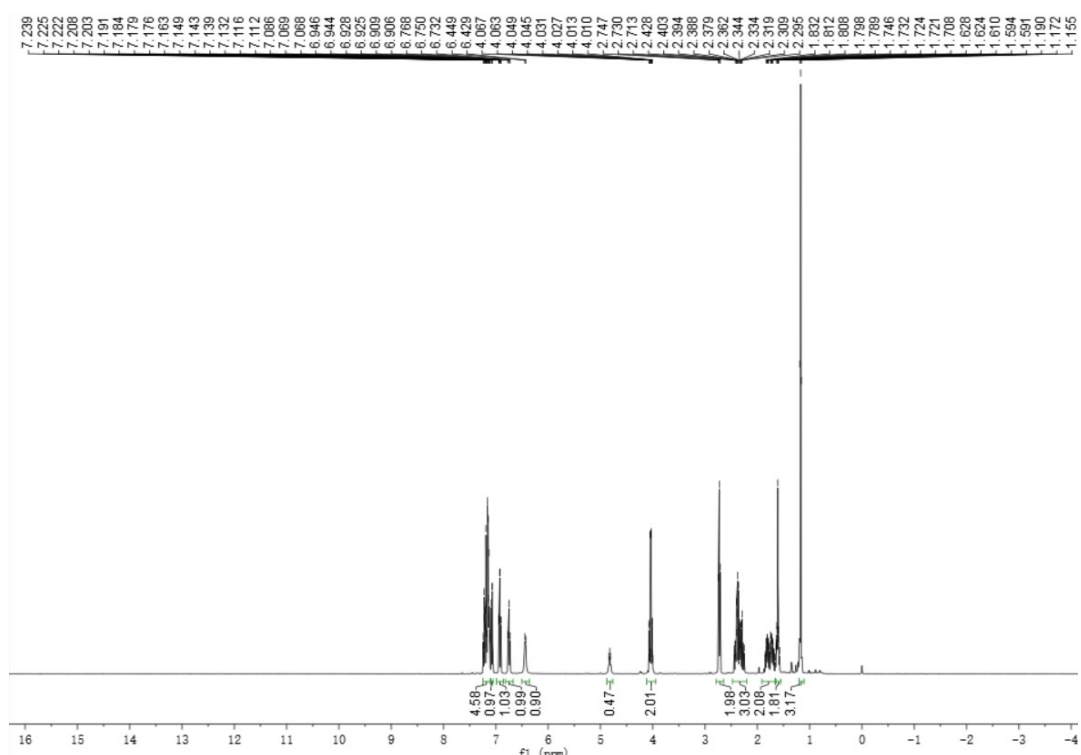

## 8. Reference

1. A. B. Pangborn, M. A. Giardello, R. H. Grubbs, R. K. Rosen, F. J. Timmers, *Organometallics* **1996**, *15*, 1518.
2. S. Sarkar, W. Sidhant, X. Jia, V. Gevorgyan, *Chem* **2022**, *8*, 3096-3108.
3. R. Guo, H. Xiao, S. Li, Y. Luo, J. Bai, M. Zhang, Y. Guo, X. Qi, G. Zhang, *Angew. Chem. Int. Ed.*, **2022**, *61*, e202208232.
4. J. B. McManus, N. P. R. Onuska, D. A. Nicewicz, *J. Am. Chem. Soc.*, **2018**, *140*, 9056-9060.
5. J. B. McManus, N. P. R. Onuska, M. S. Jeffreys, N. C. Goodwin, D. A. Nicewicz, *Org. Lett.* **2020**, *22*, 679-683.

## 9. Spectra for Substrates and Products Product Characterization

### Pregnenolone derivative, $^1\text{H}+^{13}\text{C}$

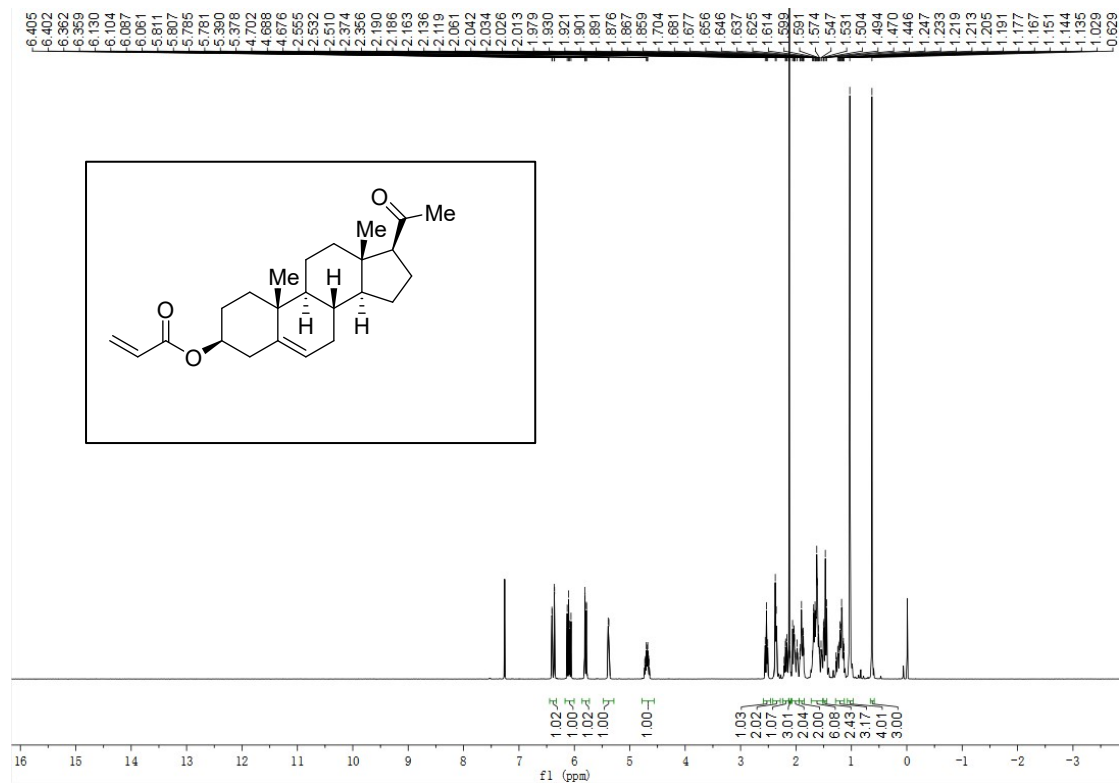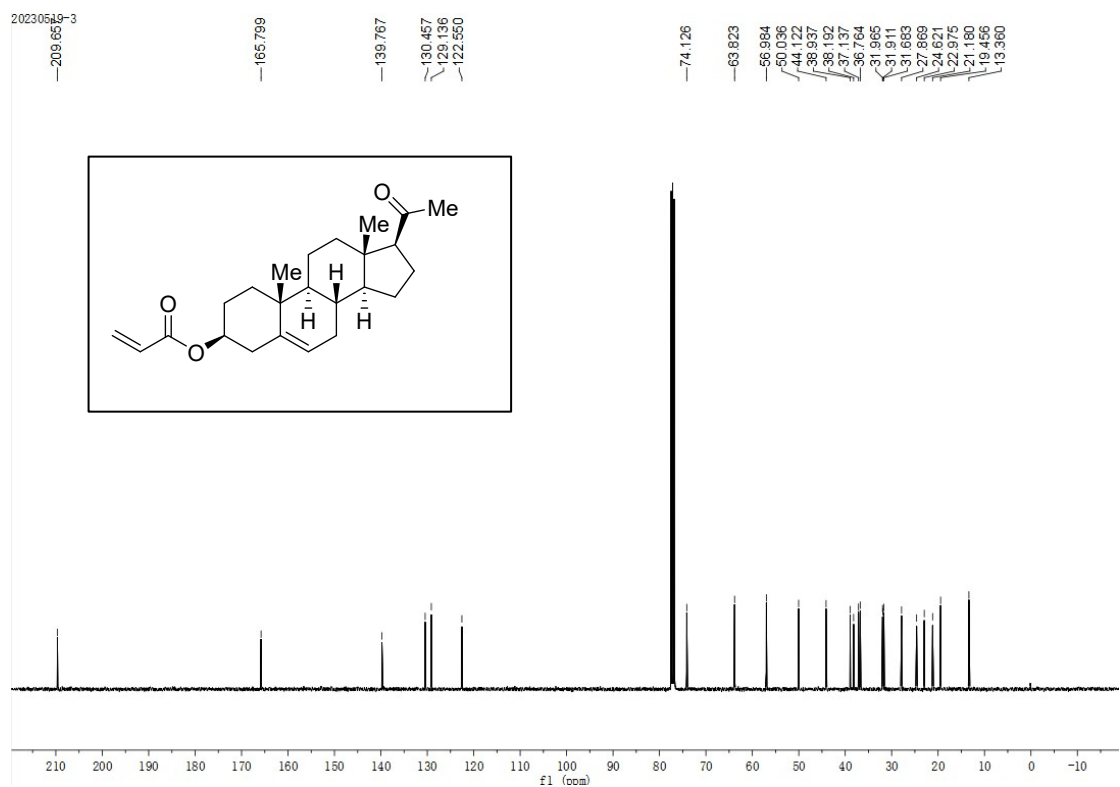

Estrone derivative,  $^1\text{H}+^{13}\text{C}$

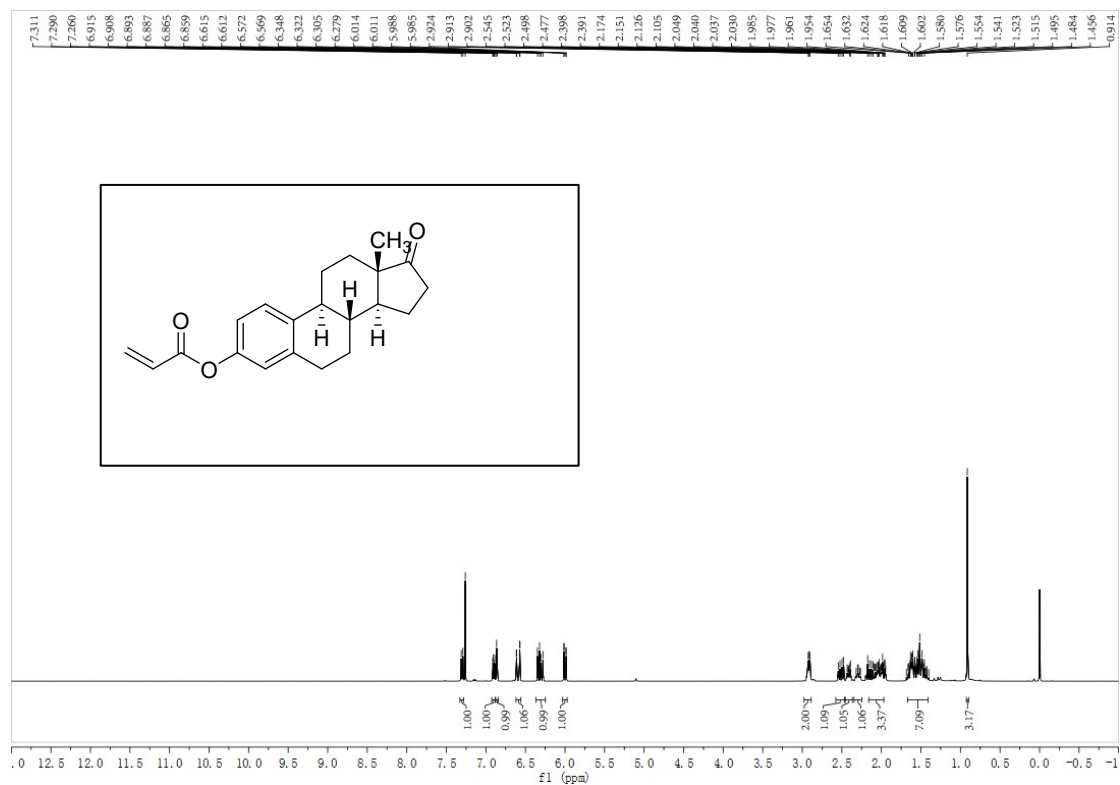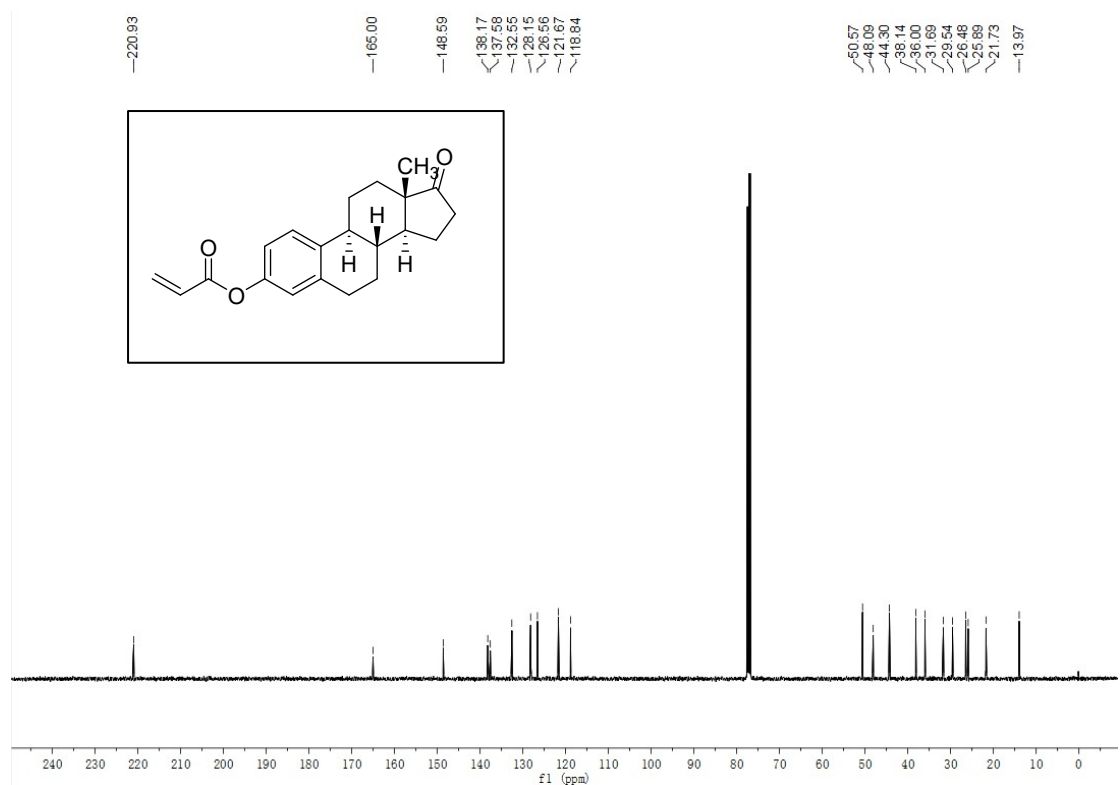

Diosgenin derivative,  $^1\text{H}+^{13}\text{C}$

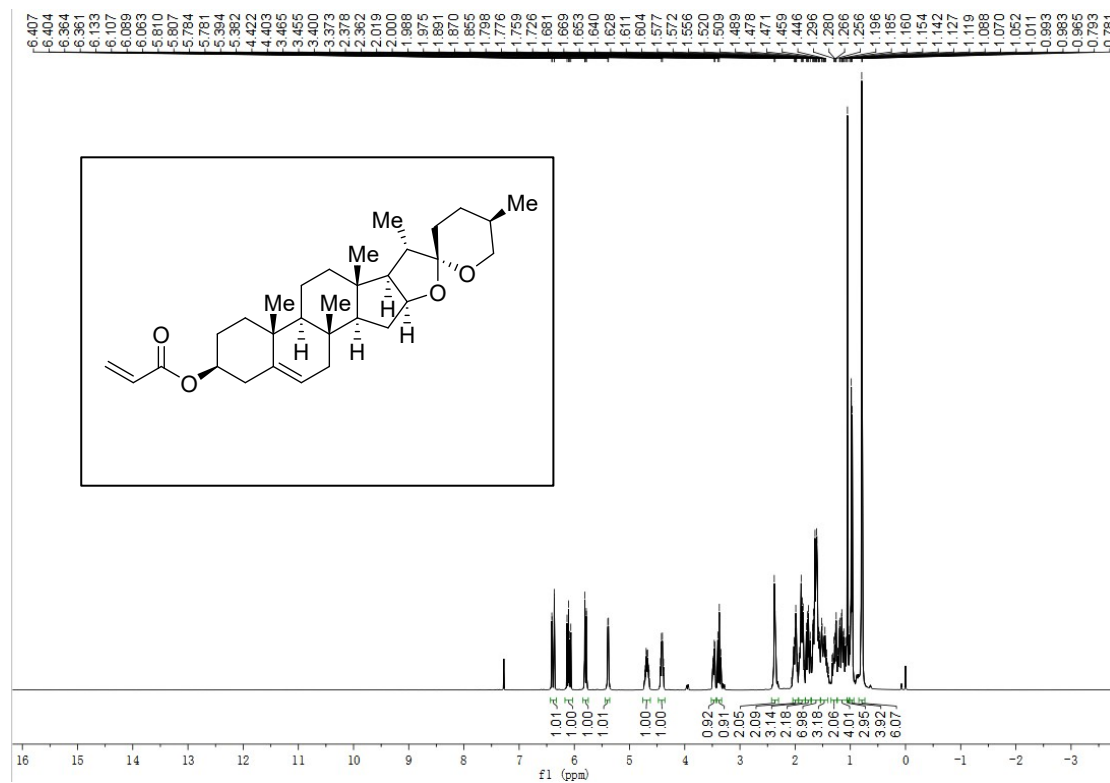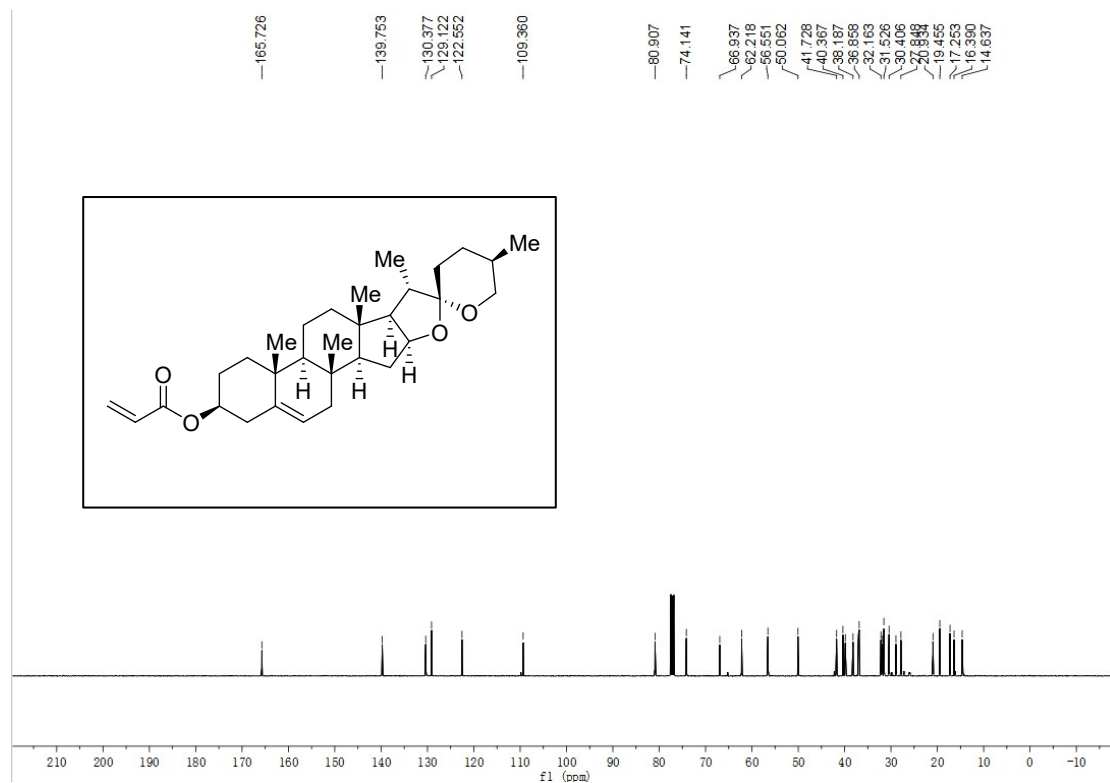

(+)-Cedrol derivative,  $^1\text{H}+^{13}\text{C}$

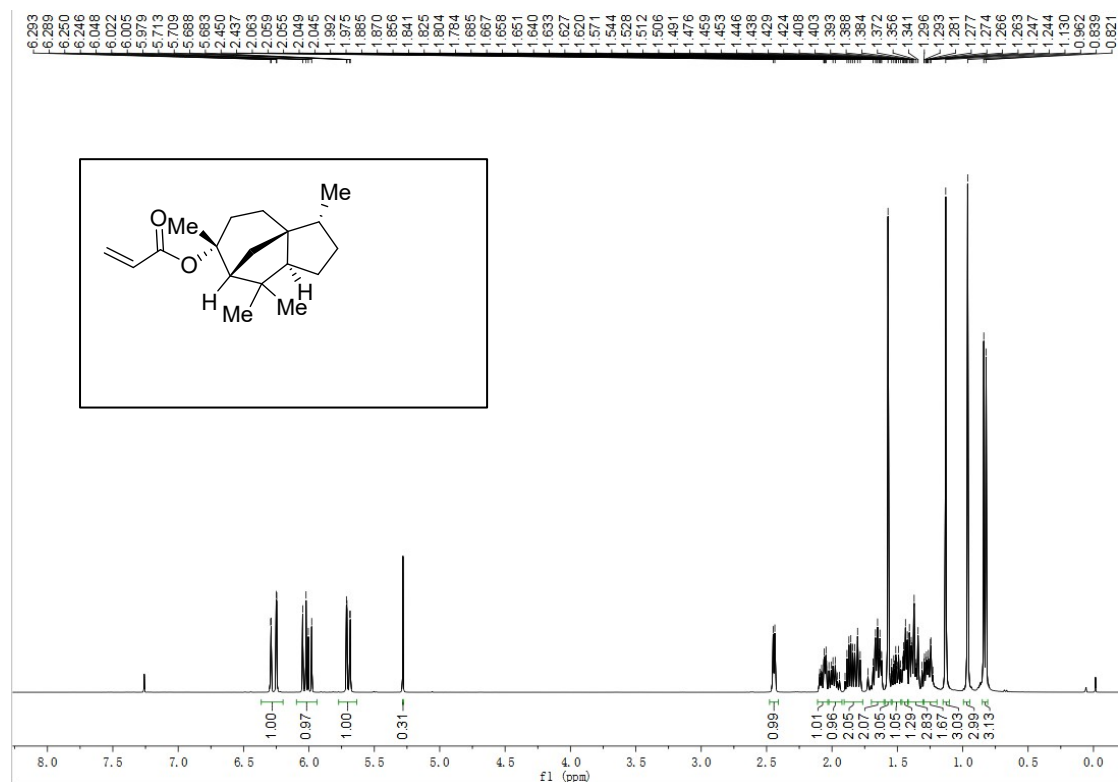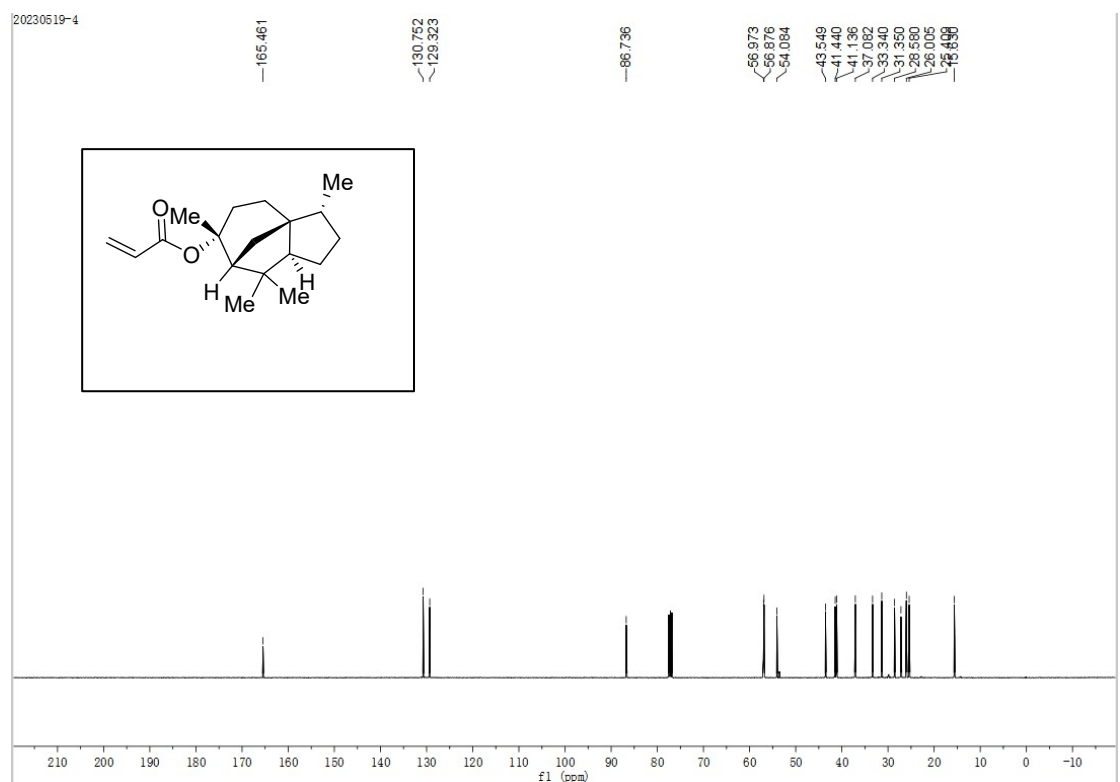



Citronellol derivative,  $^1\text{H}+^{13}\text{C}$

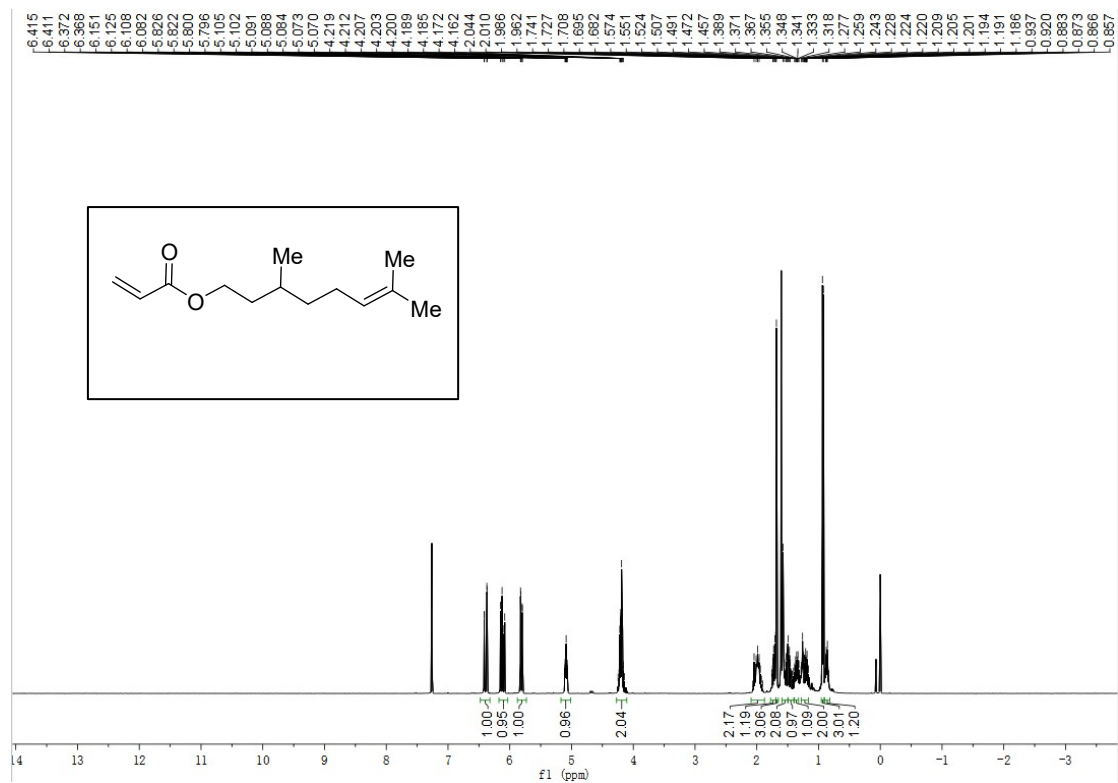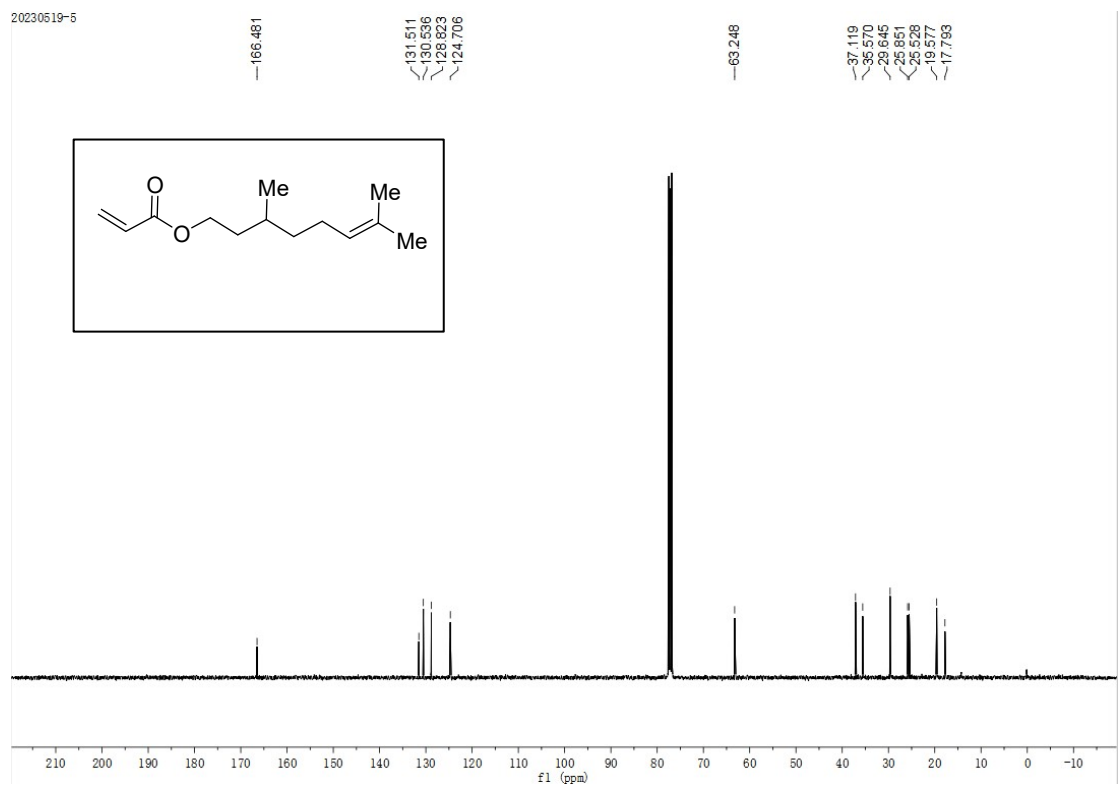

N-Debenzyl Donepezil derivate,  $^1\text{H}+^{13}\text{C}$

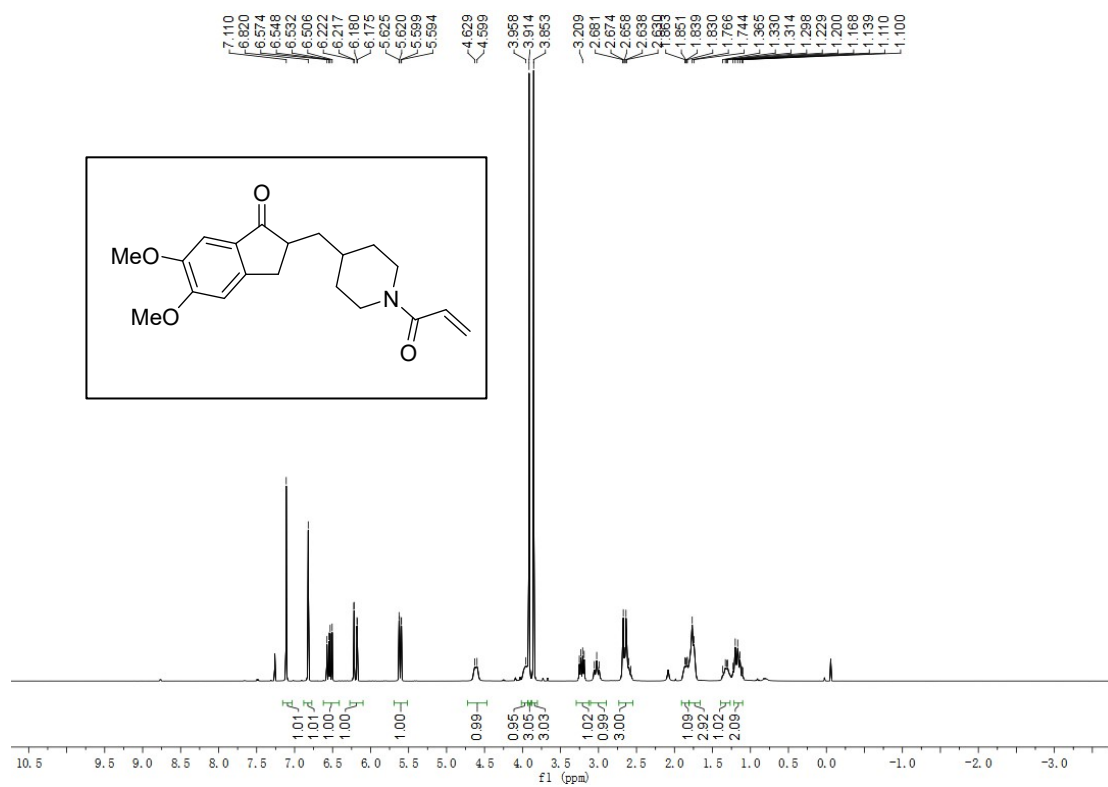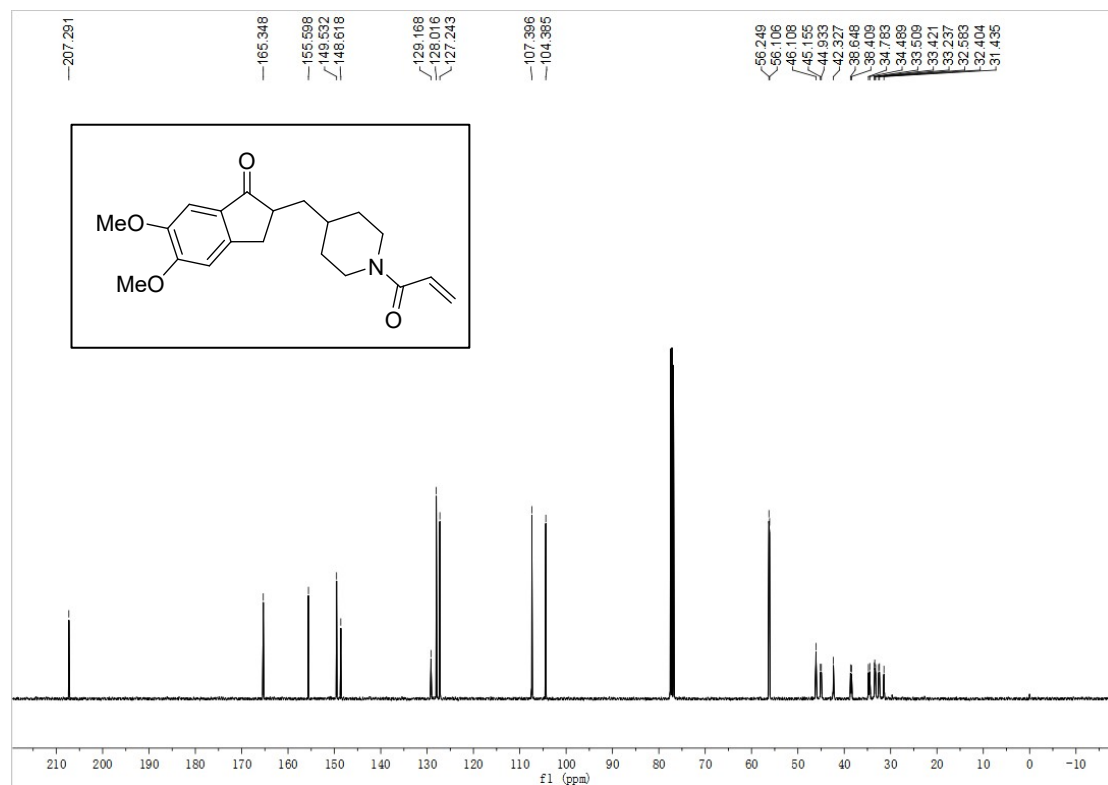

**3a, <sup>1</sup>H+<sup>13</sup>C**

7.504  
7.489  
7.369  
7.375

4.362  
4.347  
4.332  
4.145  
4.129  
4.111  
3.467  
3.449  
3.428  
3.408  
3.392  
2.455  
2.435  
2.416  
2.396  
2.260  
2.242  
2.227  
2.111  
2.096  
2.082  
2.066  
1.984  
1.237  
1.220

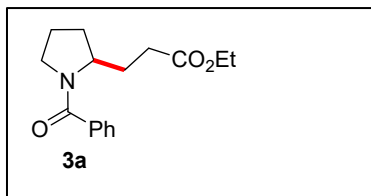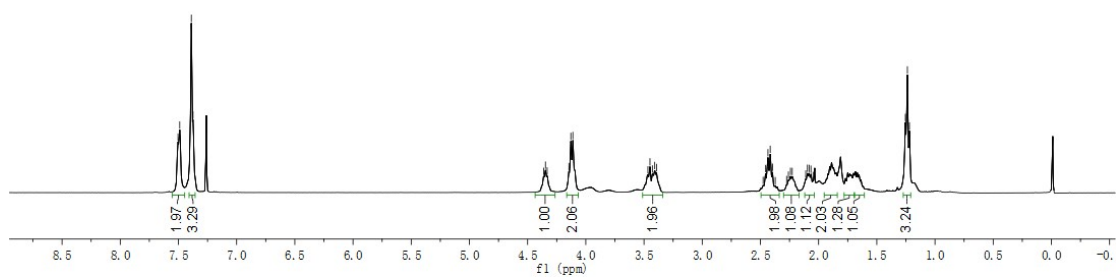

173.62  
170.44

137.32  
130.06  
128.32  
127.45

60.55  
56.68  
50.19

31.35  
30.33  
29.35  
25.11  
14.33

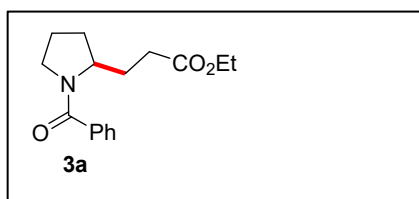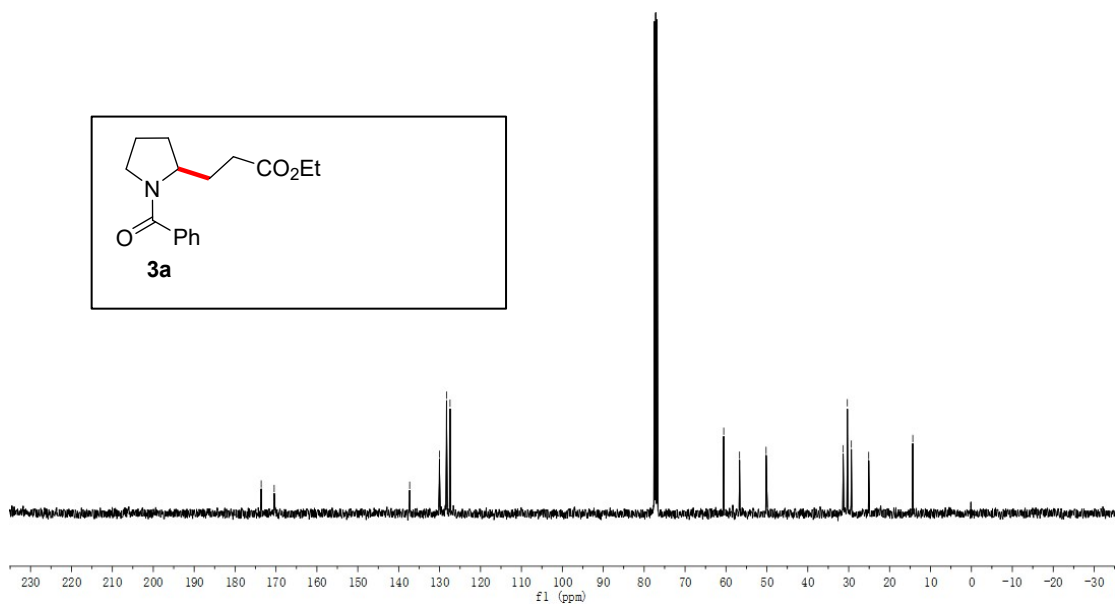

**3b,  $^1\text{H}+^{13}\text{C}$**

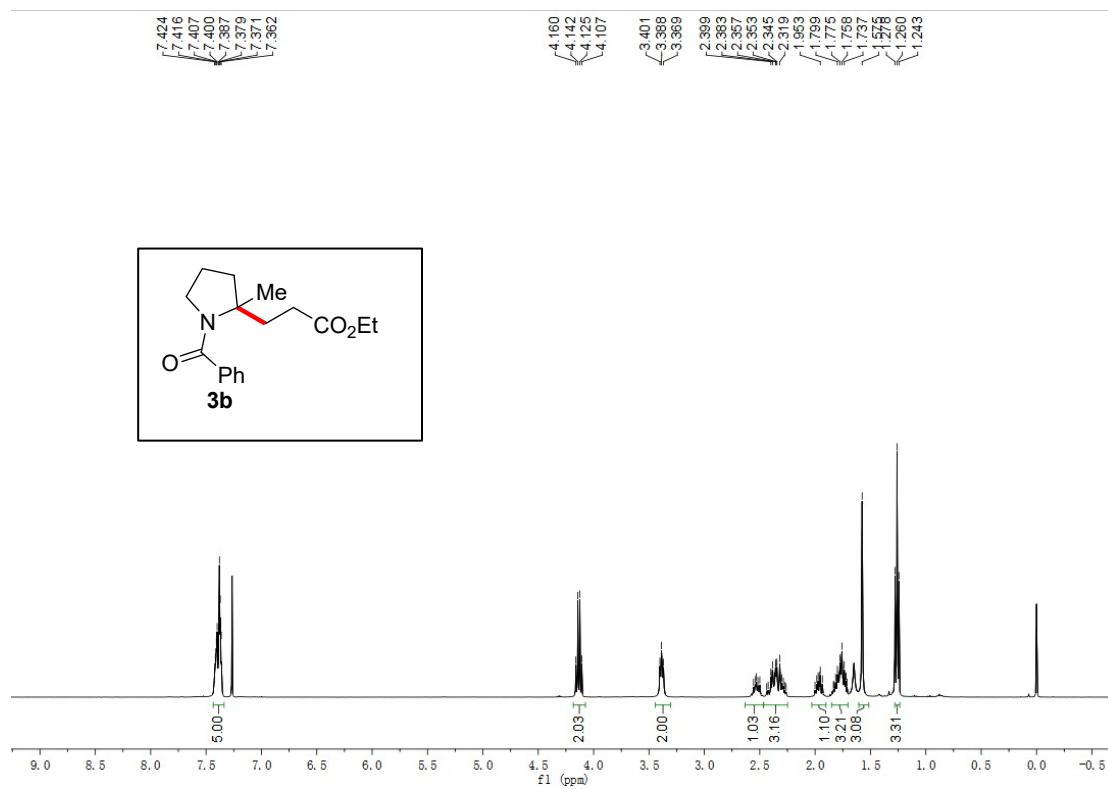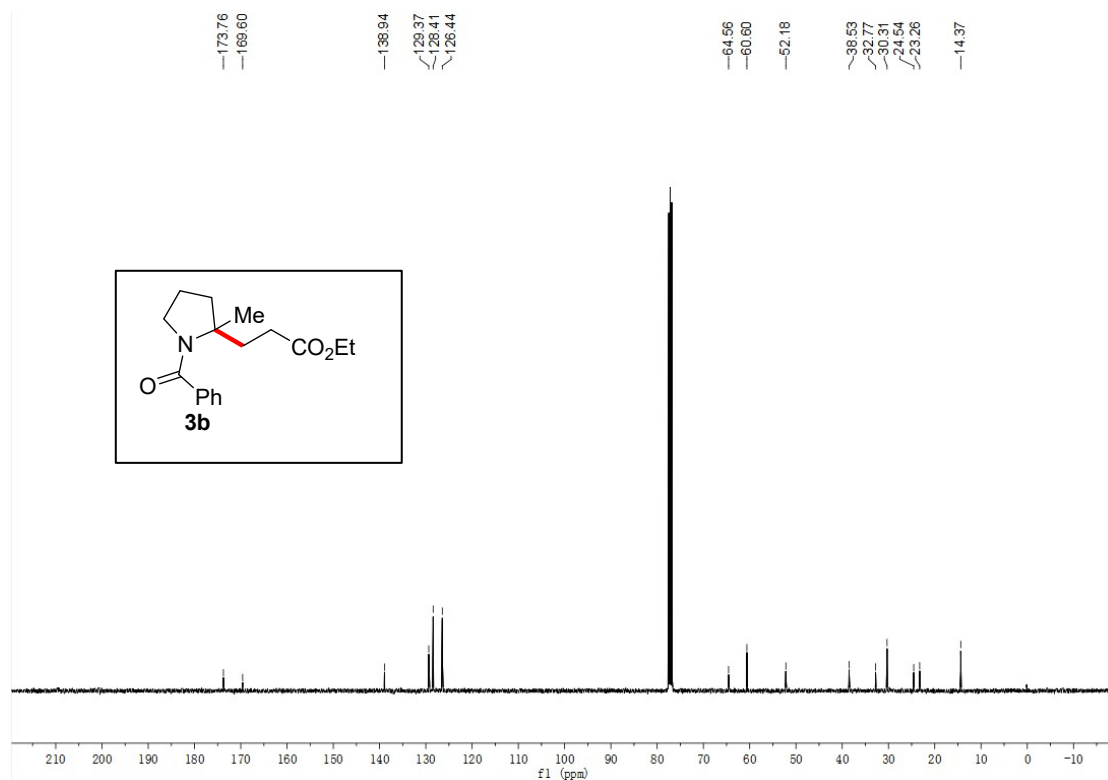

**3c,  $^1\text{H}+^{13}\text{C}$**

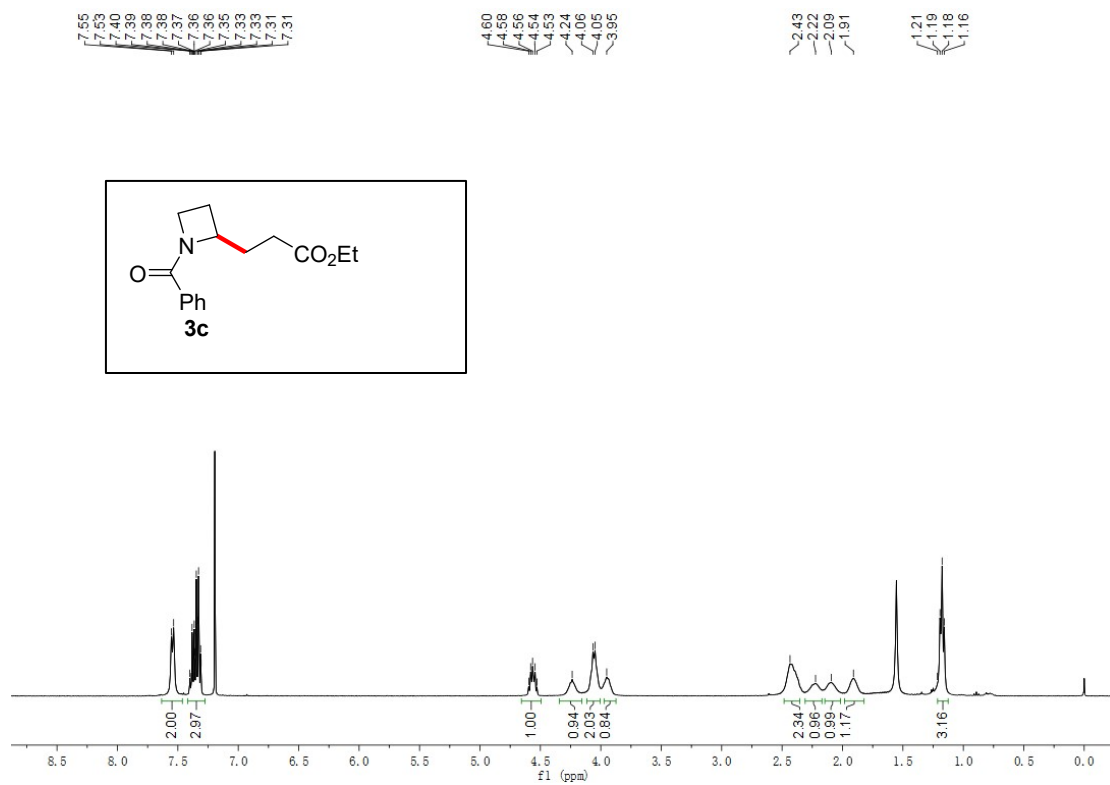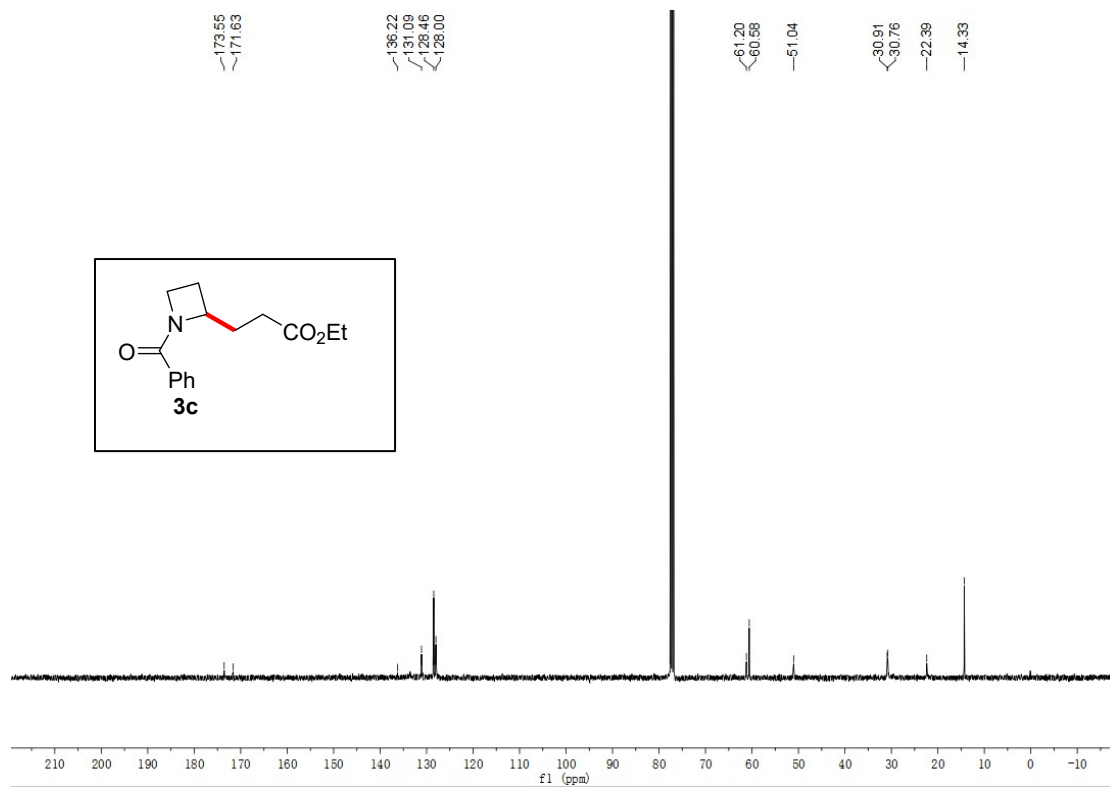

3d,  $^1\text{H}+^{13}\text{C}$

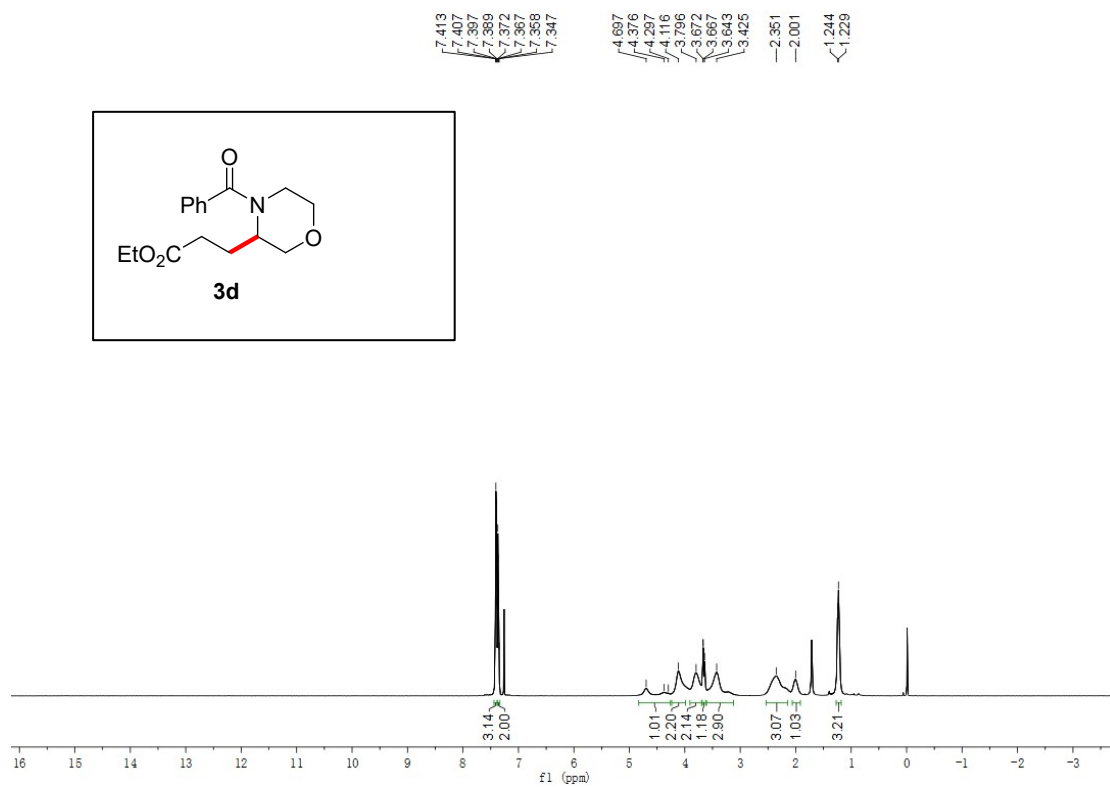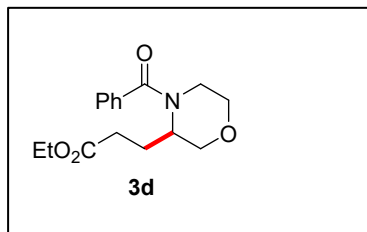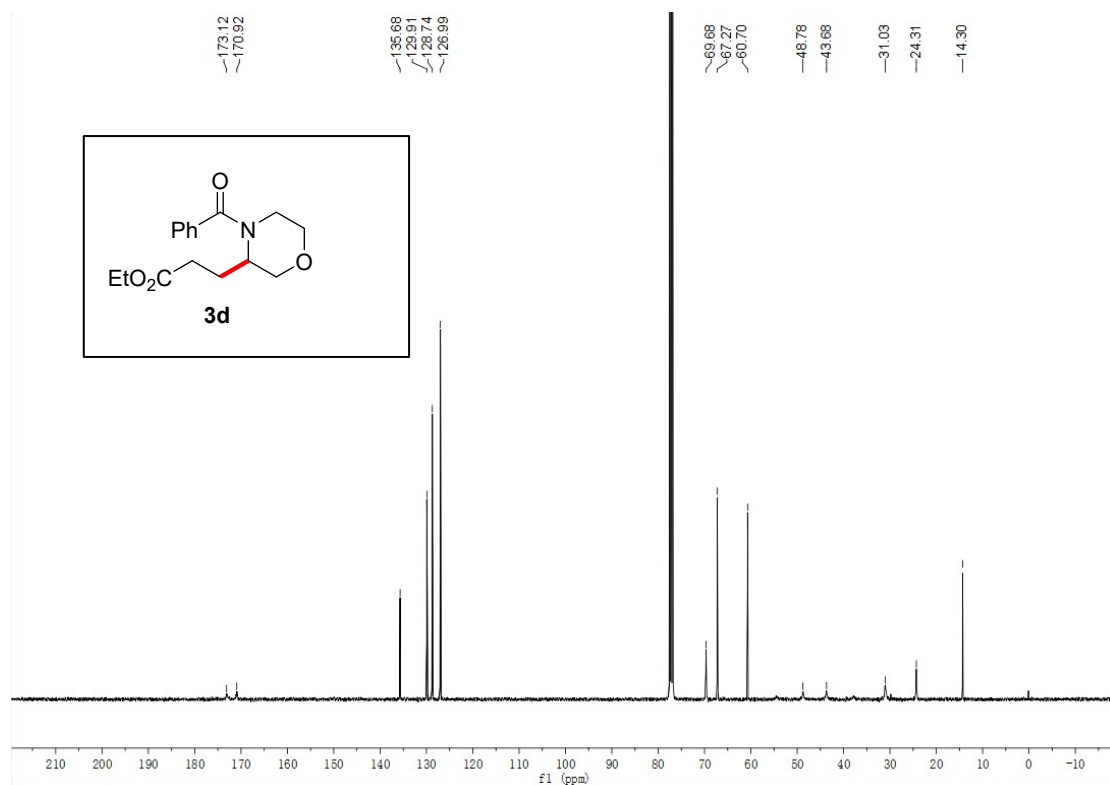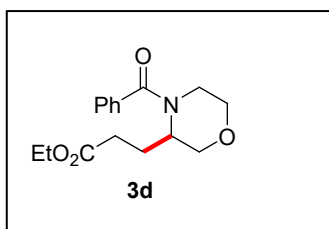

**3e, <sup>1</sup>H+<sup>13</sup>C**

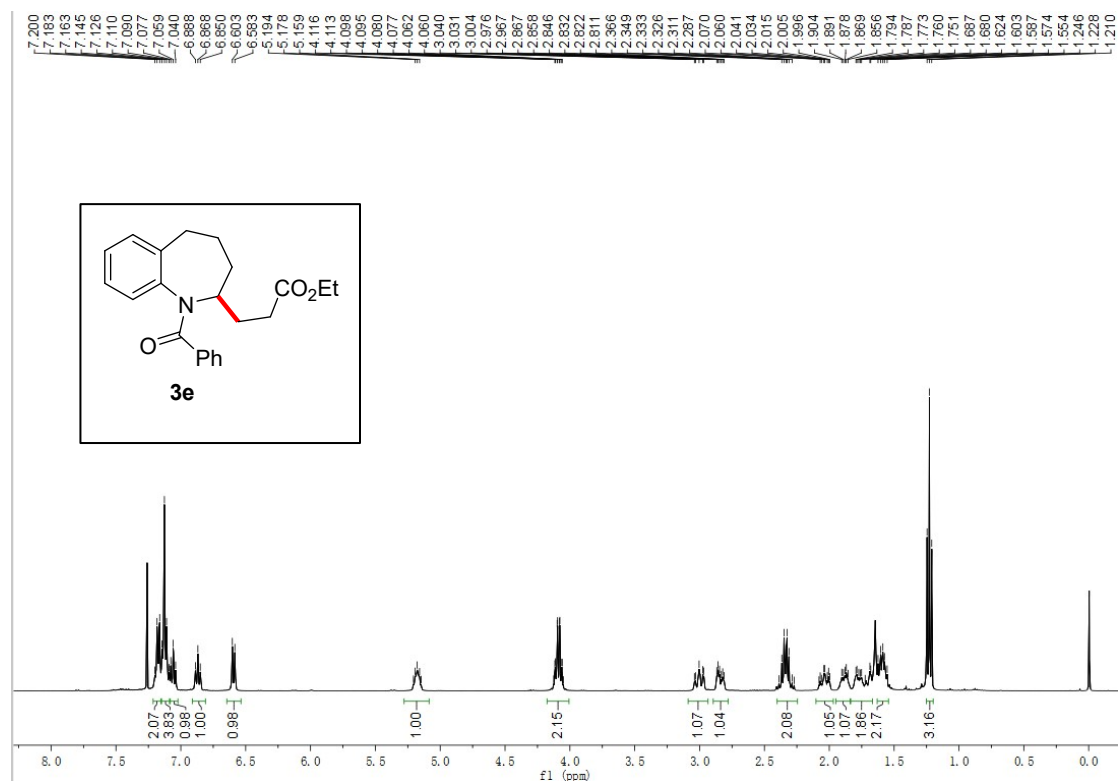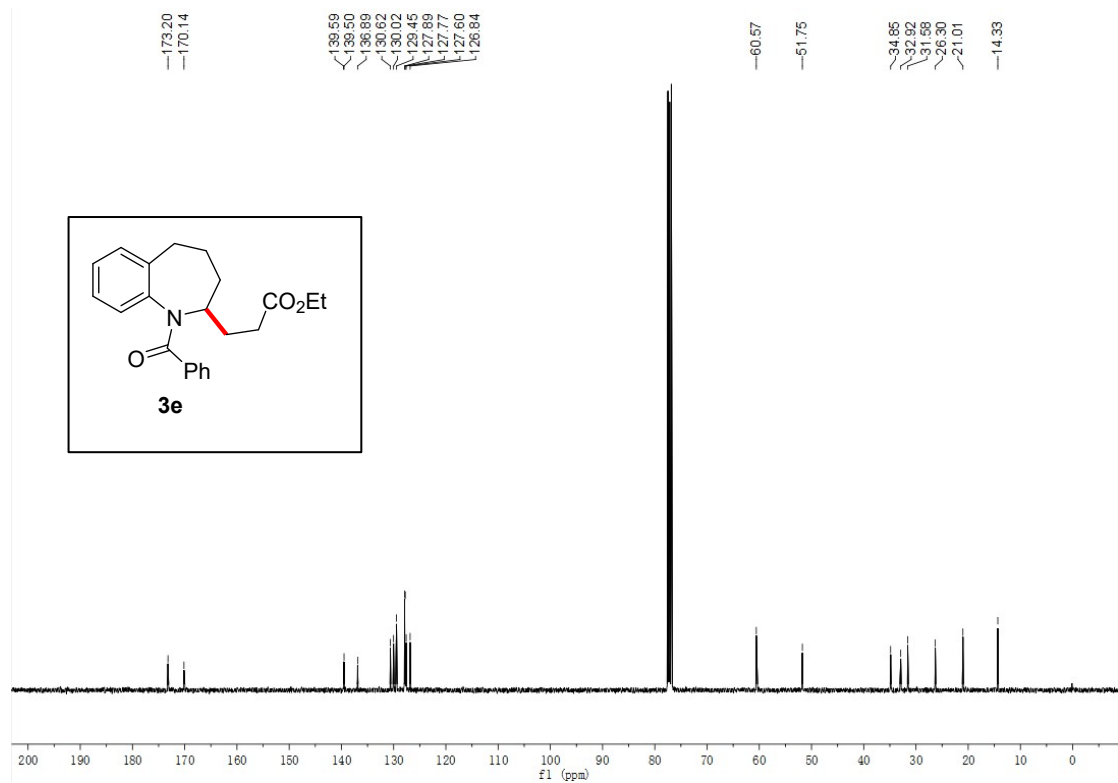

**3f, <sup>1</sup>H+<sup>13</sup>C**

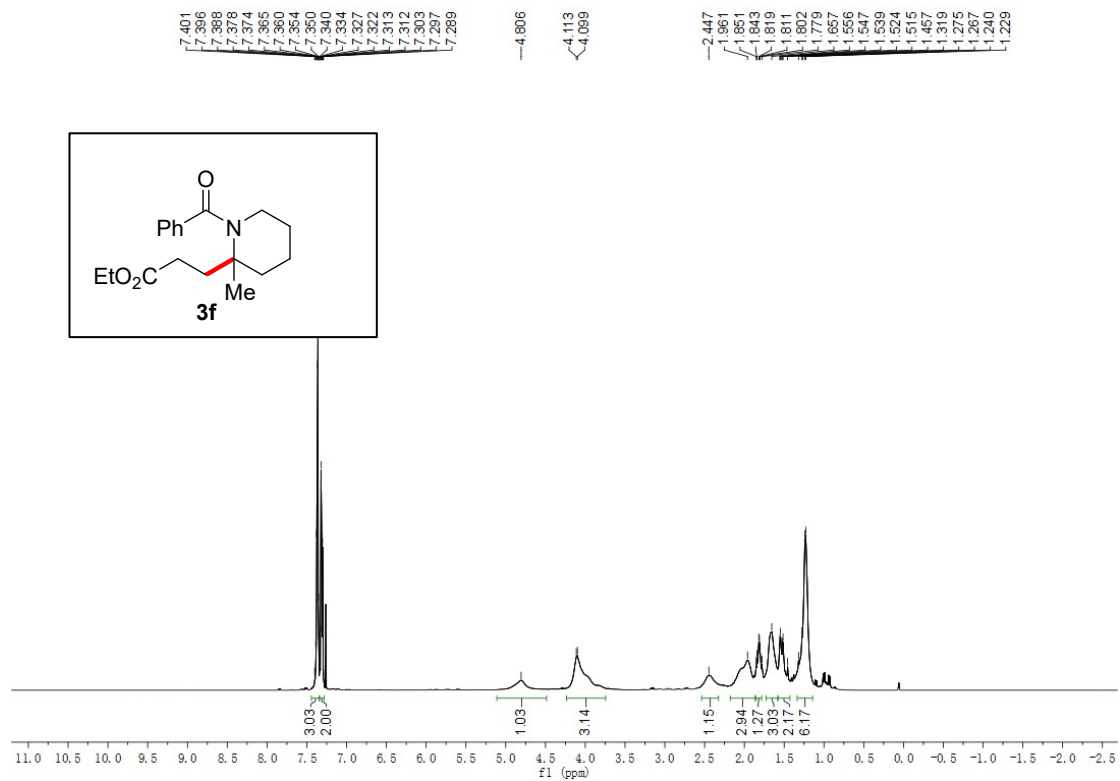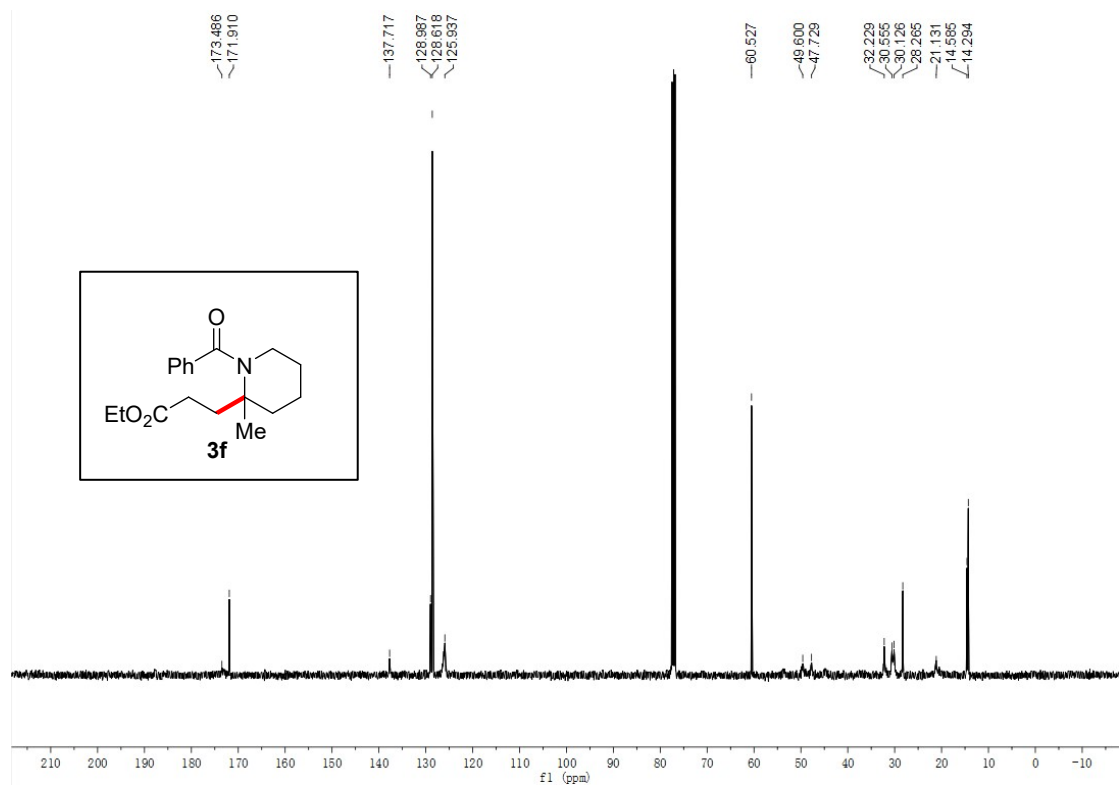



**3g,  $^1\text{H}+^{13}\text{C}$**

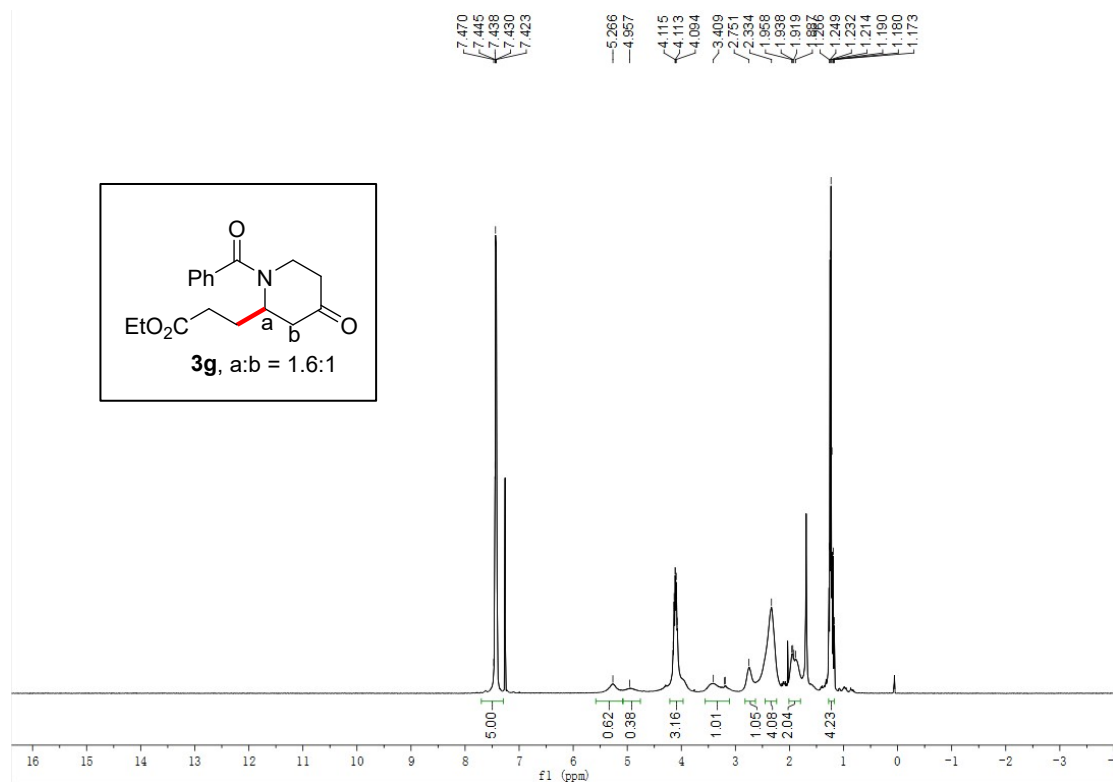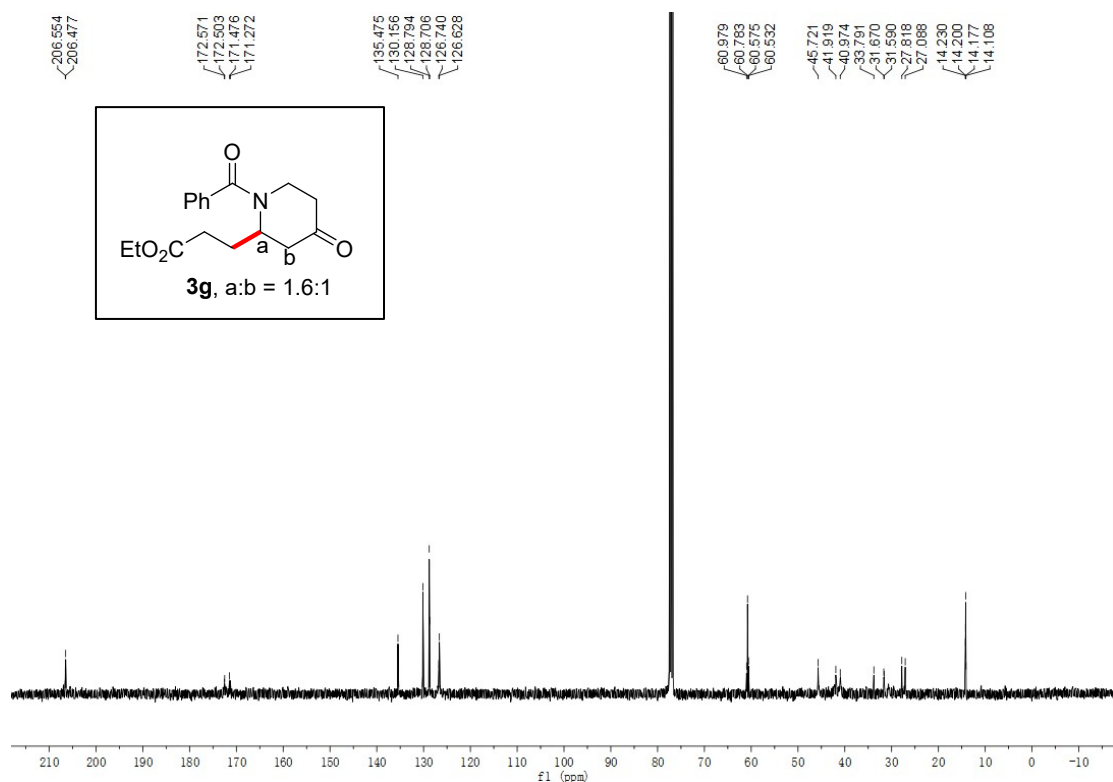

3h,  $^1\text{H}+^{13}\text{C}$

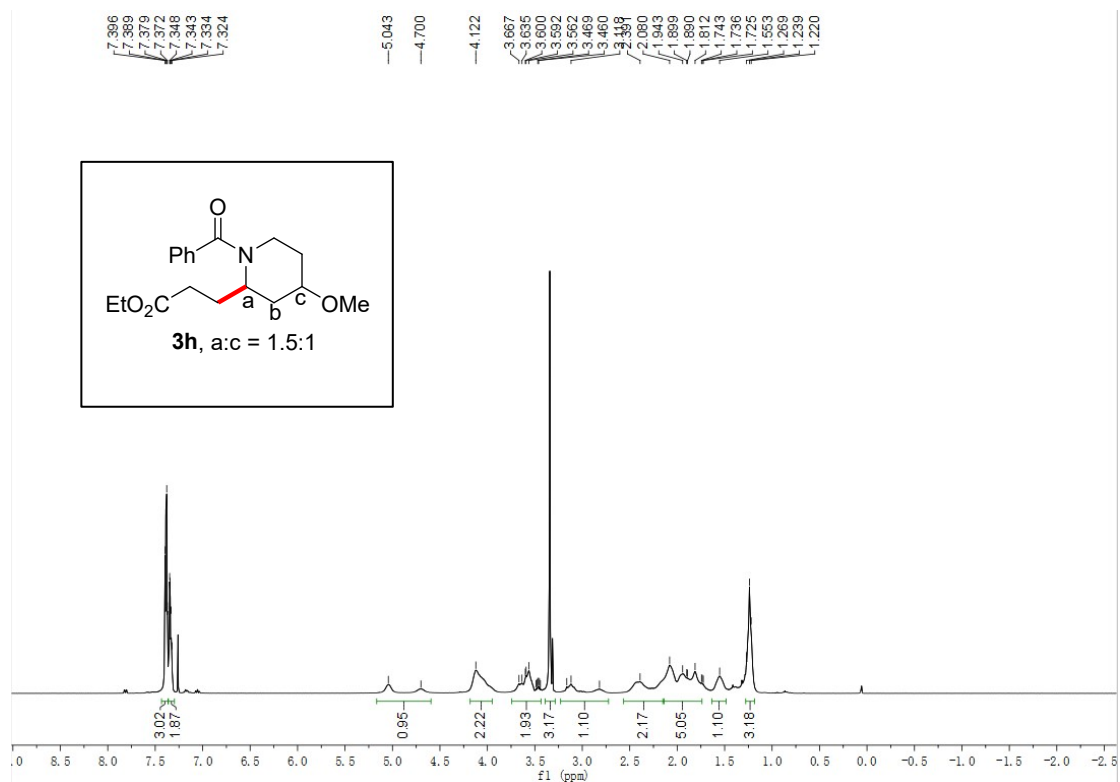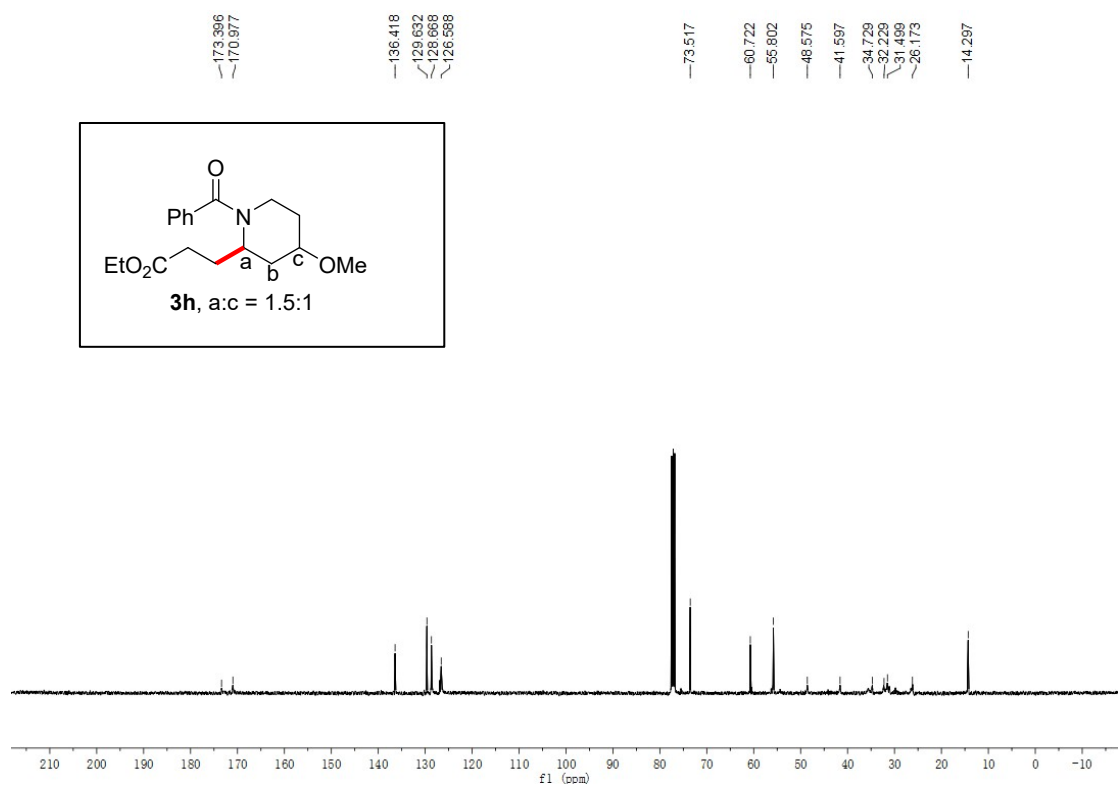

**3i, <sup>1</sup>H+<sup>13</sup>C**

7.421  
7.416  
7.409  
7.404  
7.397  
7.371  
7.366  
7.353  
4.128  
4.110  
4.093  
4.075  
3.660  
3.646  
2.939  
2.901  
2.861  
2.833  
2.826  
2.225  
2.214  
2.184  
2.164  
2.164  
2.098  
2.092  
1.844  
1.840  
1.830  
1.824  
1.808  
1.797  
1.791  
1.778  
1.773  
1.769  
1.743  
1.715  
1.702  
1.693  
1.649  
1.642  
1.616  
1.610  
1.600  
1.479  
1.474  
1.469  
1.441  
1.437  
1.384  
1.356  
1.346  
1.325  
1.317  
1.292  
1.284  
1.277  
1.262  
1.245  
1.234  
1.227  
1.217  
1.209  
1.177  
1.045  
1.040  
1.036  
1.007

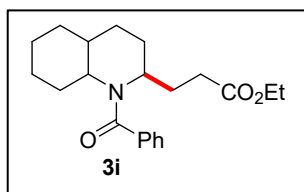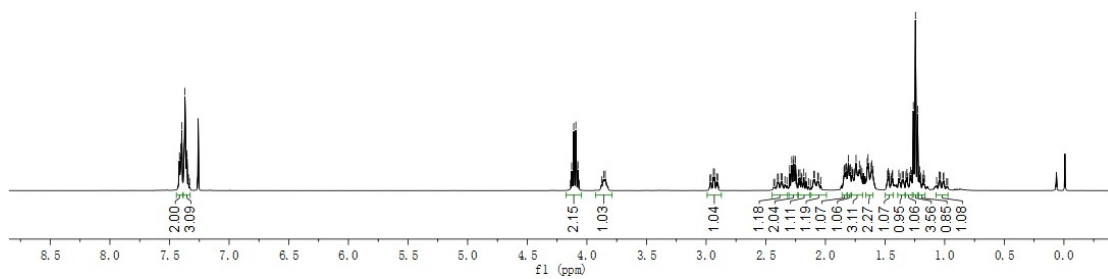

174.47  
173.17  
139.02  
129.65  
128.55  
127.02  
60.72  
58.97  
56.76  
35.33  
33.99  
31.48  
30.19  
29.18  
27.97  
26.96  
25.73  
25.25  
14.33

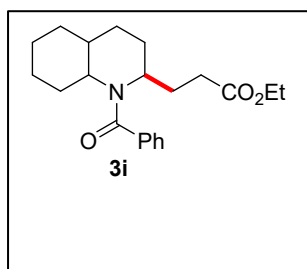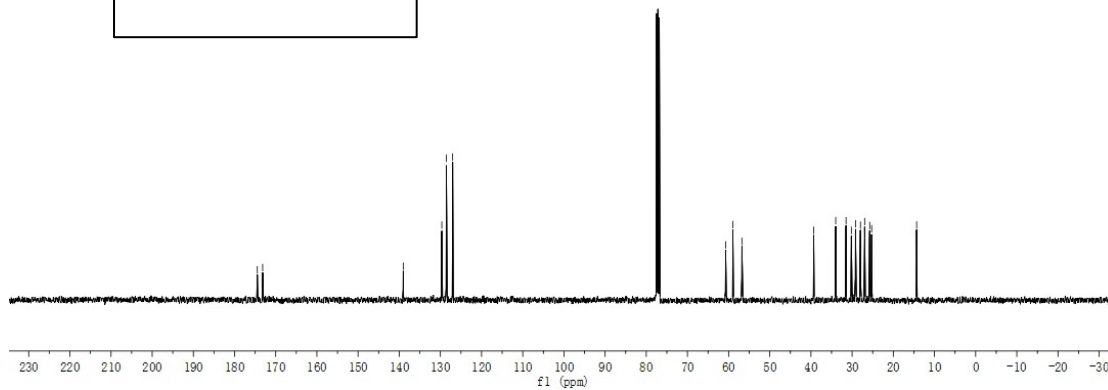

3j,  $^1\text{H}+^{13}\text{C}$

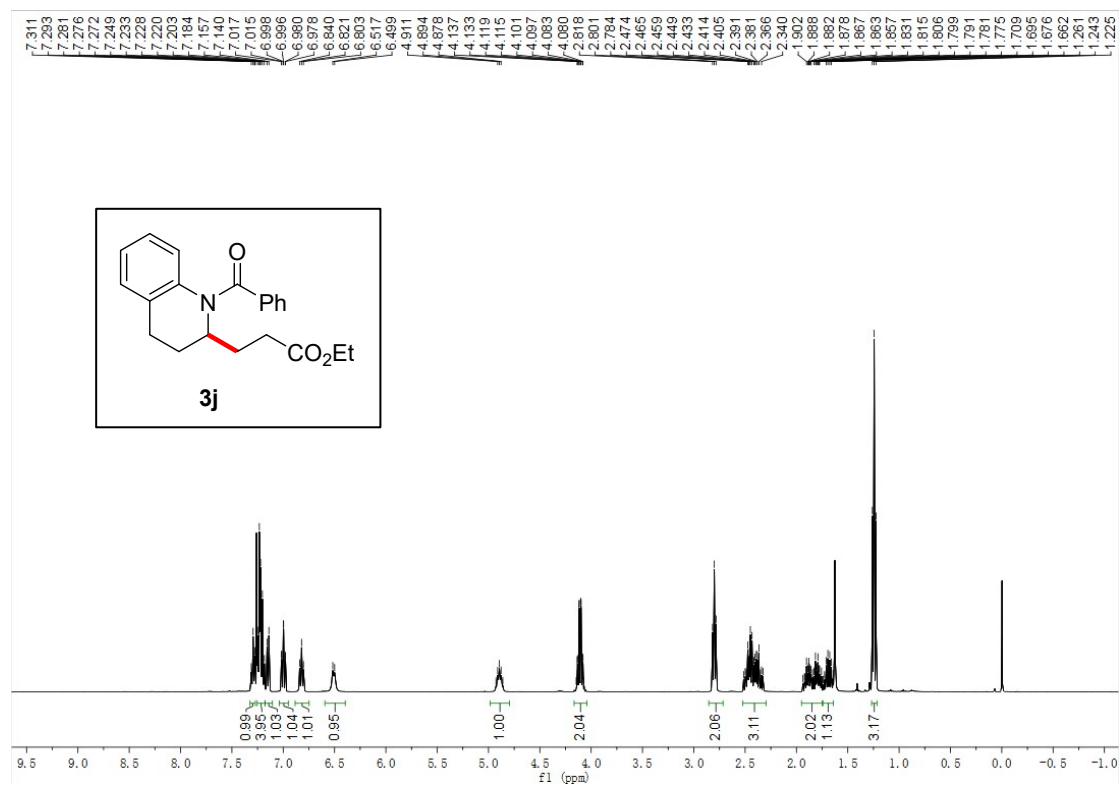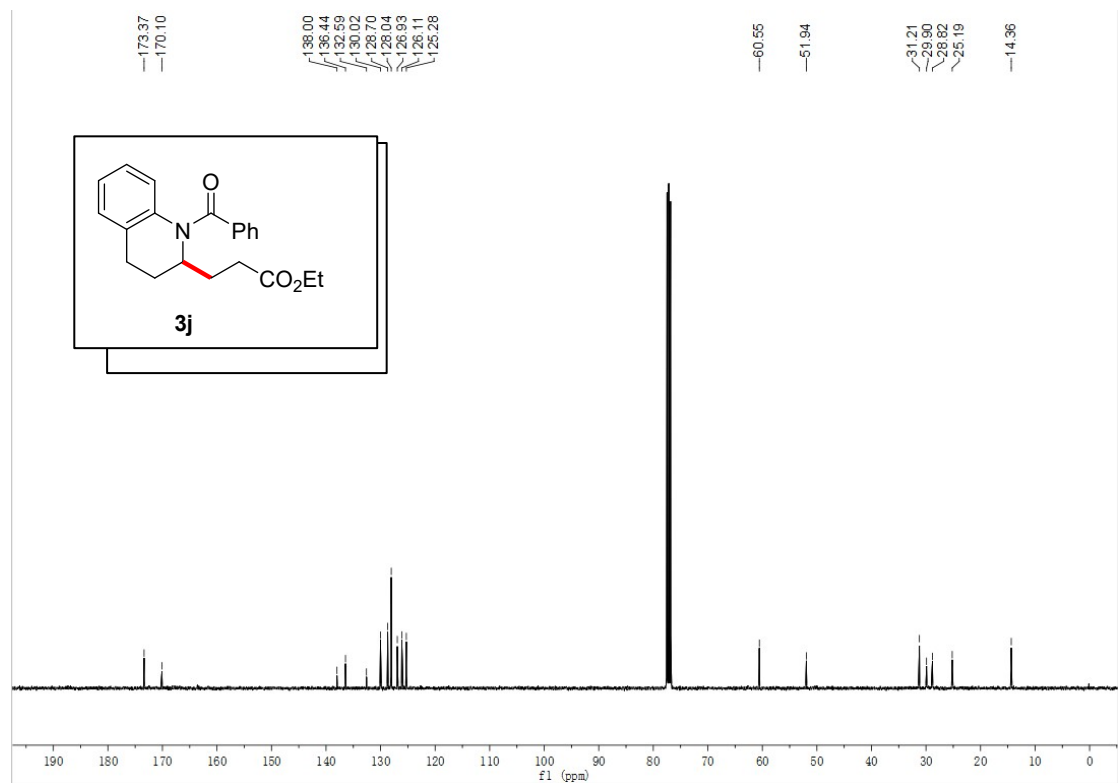

**3k, <sup>1</sup>H+<sup>13</sup>C**

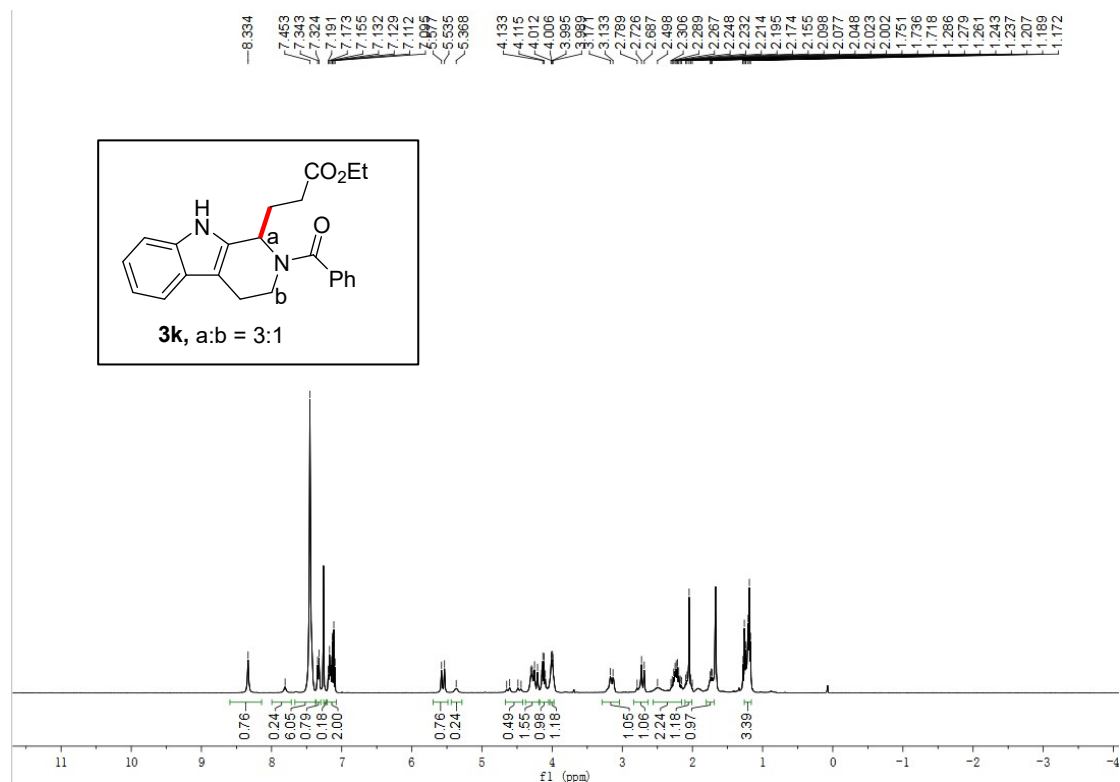

May17-2023 20230427-1-2-C

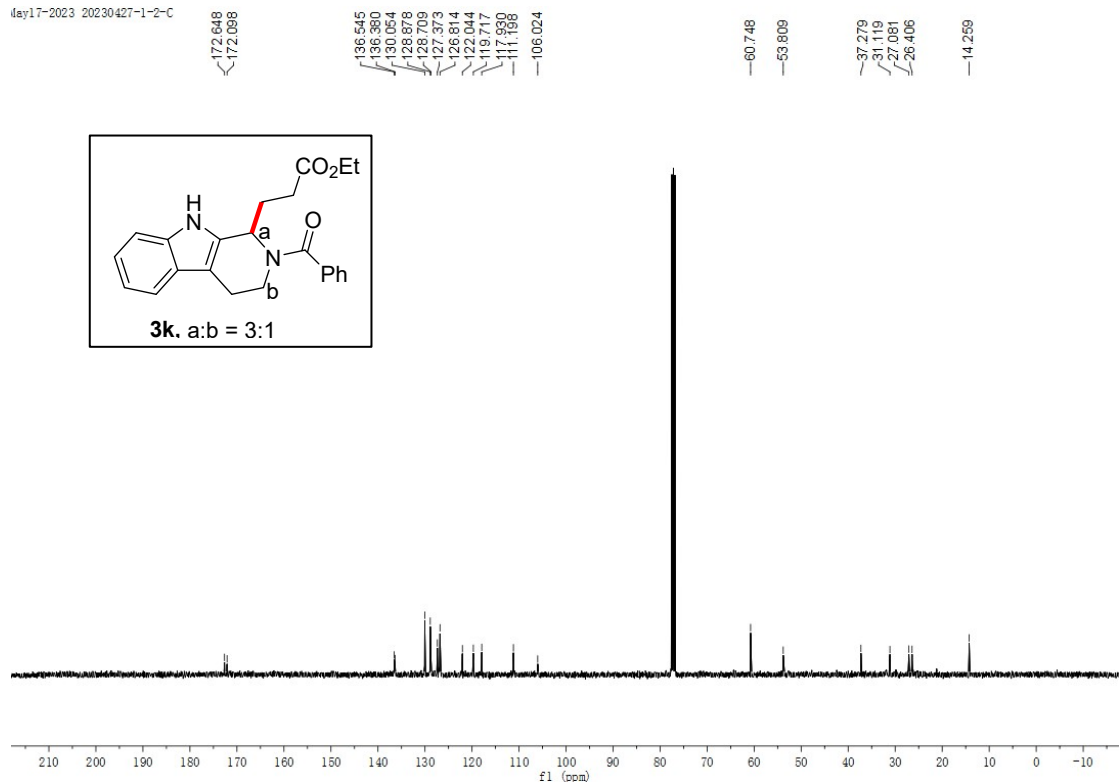

4a,  $^1\text{H}+^{13}\text{C}$

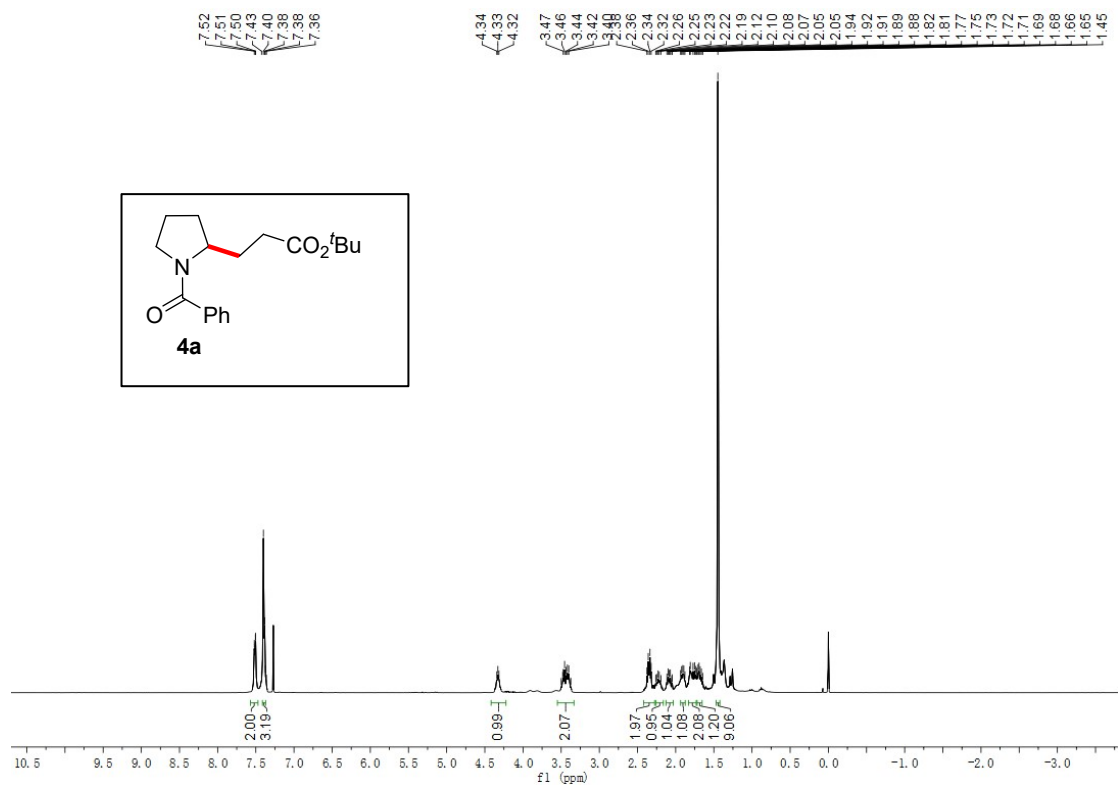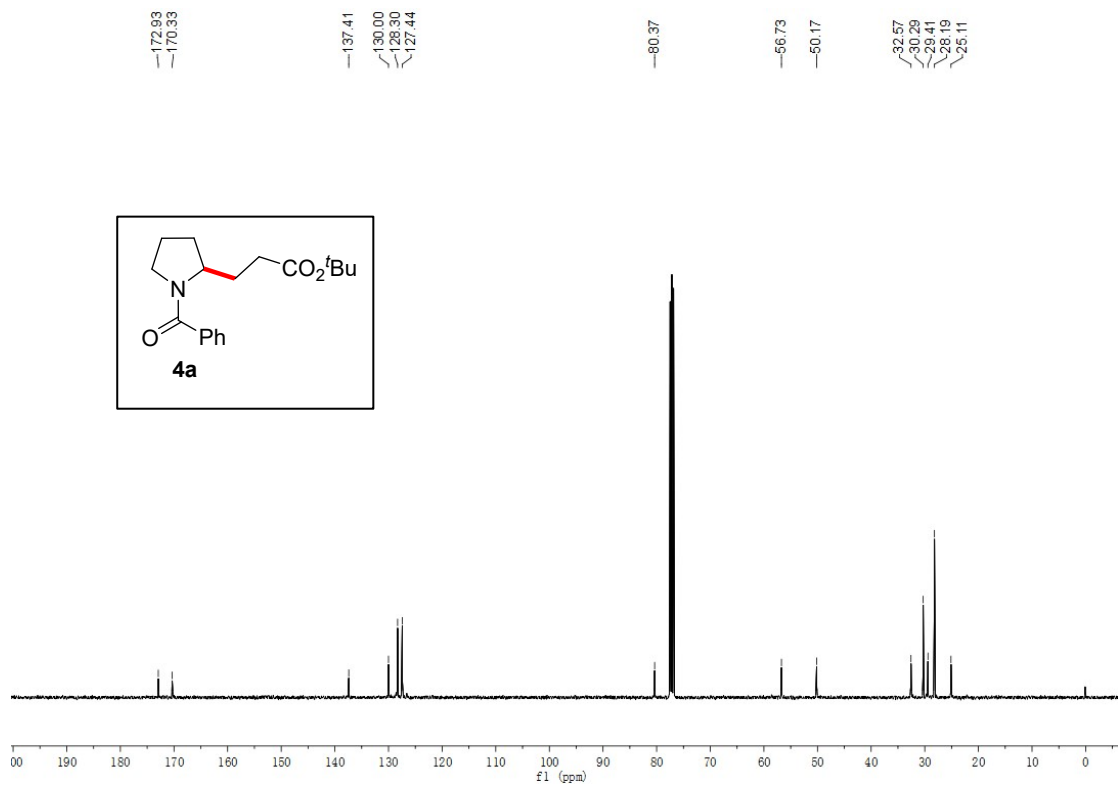

4b,  $^1\text{H}+^{13}\text{C}$

7.529  
7.514  
7.510  
7.484  
7.479  
7.423  
7.413  
7.407  
7.398  
7.368  
7.366  
7.327  
7.312  
7.298  
7.220  
7.211  
4.202  
4.195  
4.184  
4.175  
4.166  
4.154  
4.136  
4.118  
4.100  
3.649  
3.636  
3.623  
3.426  
3.411  
3.403  
3.389  
2.861  
2.835  
2.819  
2.793  
2.568  
2.547  
2.516  
2.505  
2.088  
2.077  
2.069  
2.057  
2.049  
1.966  
1.944  
1.935  
1.926  
1.913  
1.894  
1.877  
1.861  
1.847  
1.744  
1.734  
1.723  
1.714  
1.327  
1.308  
1.290  
1.278  
1.272  
1.262  
1.249  
1.231  
1.213  
1.206  
1.189

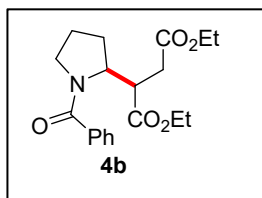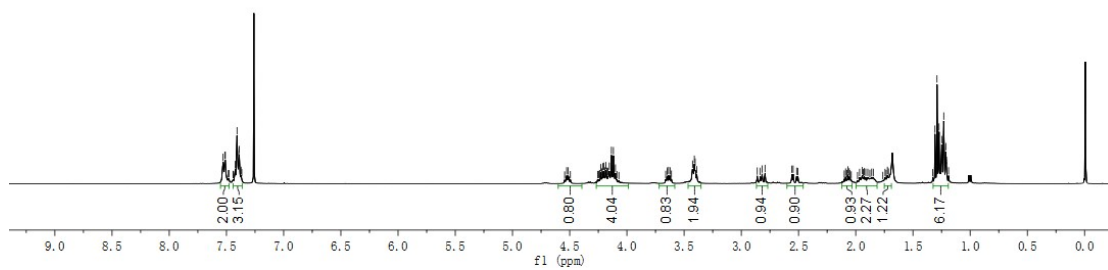

173.18  
171.78  
170.54

136.96  
130.34  
128.36  
127.56

61.04  
60.86  
58.25

50.75

43.14

34.00

27.39  
25.09

14.41  
14.27

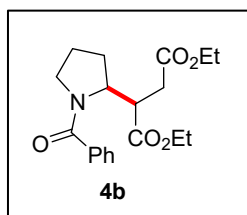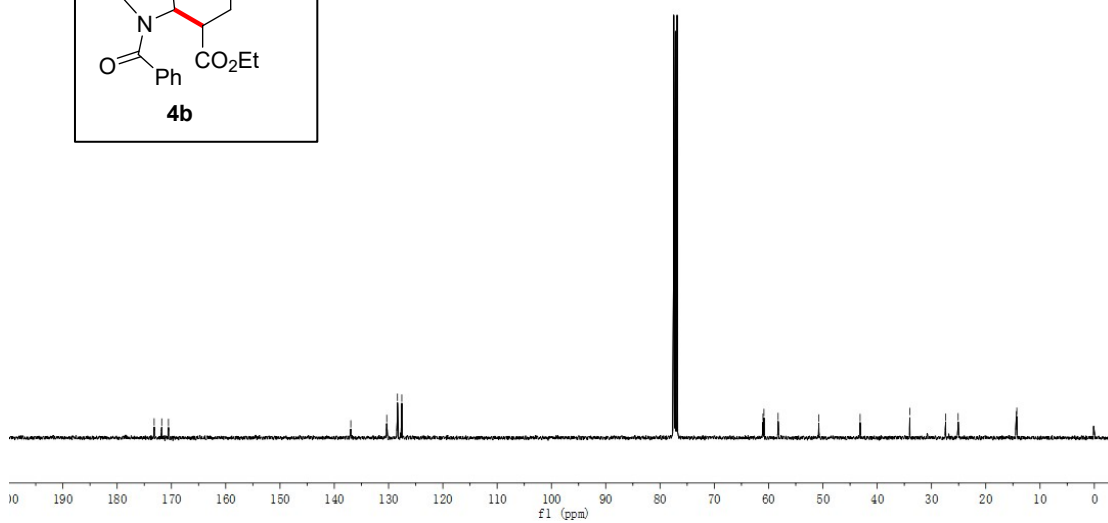

4c,  $^1\text{H}+^{13}\text{C}$

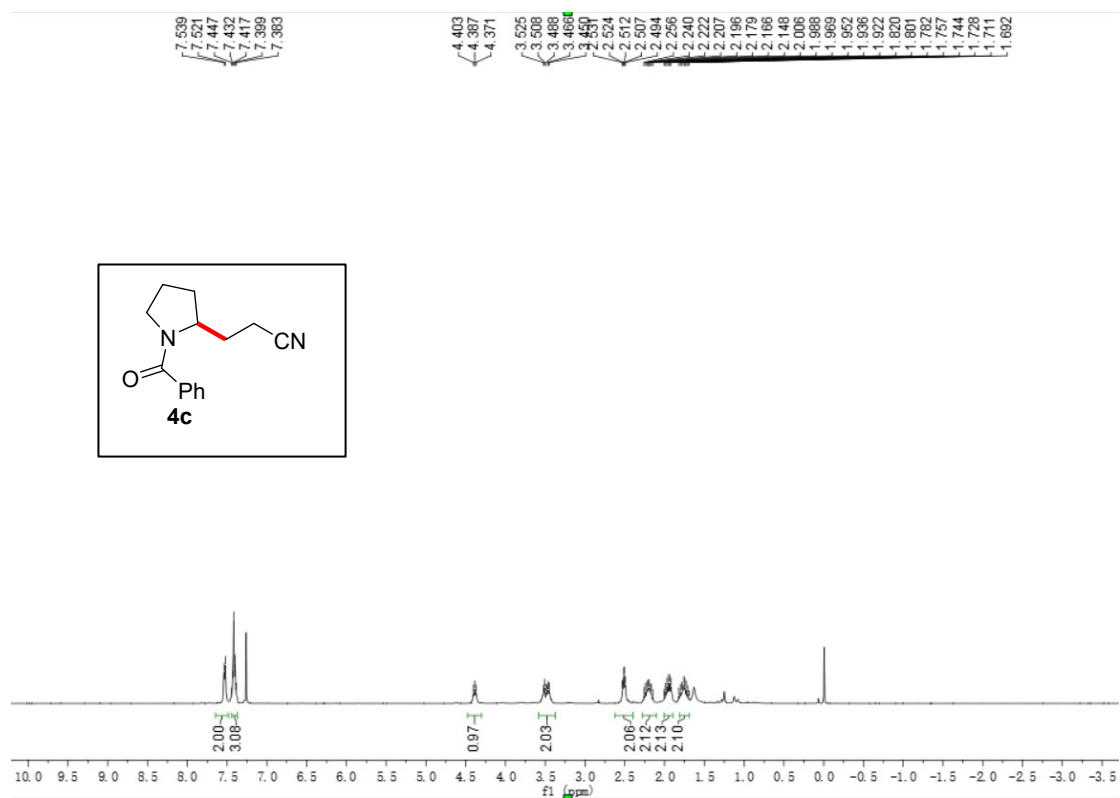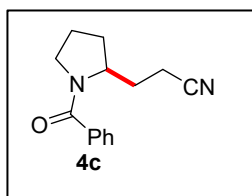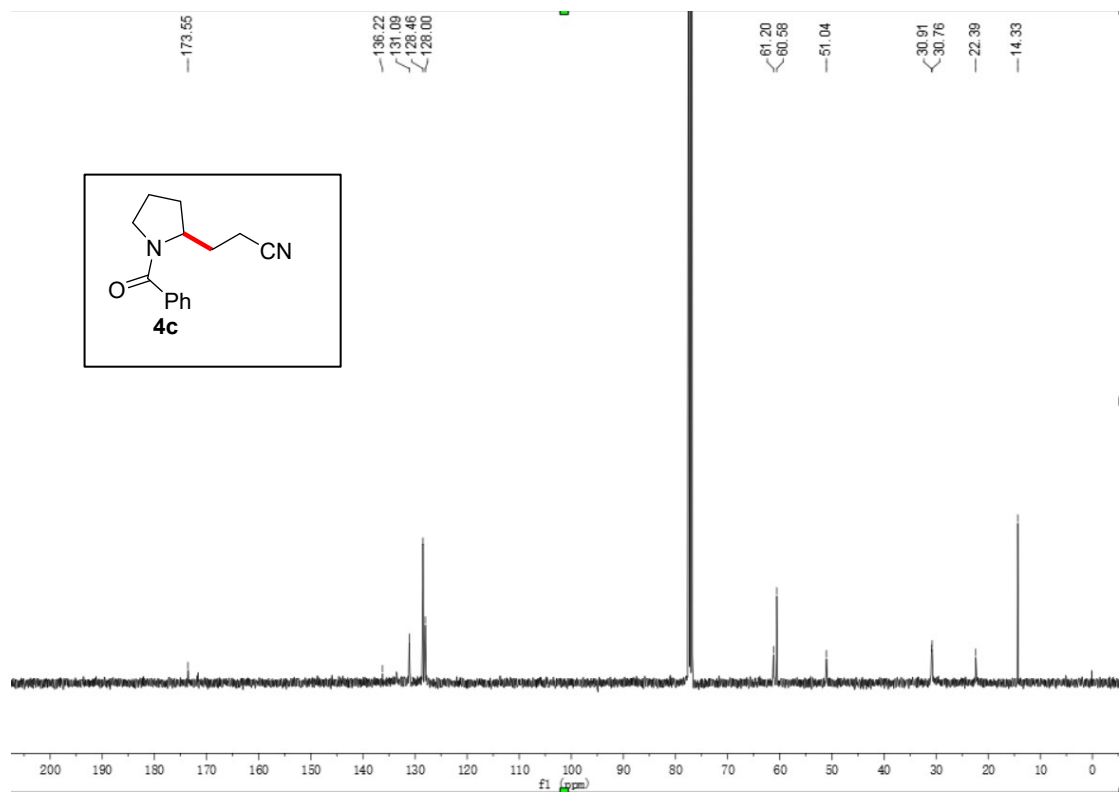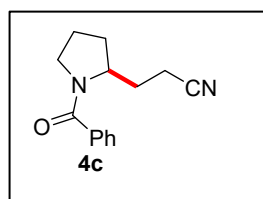



4d,  $^1\text{H}+^{13}\text{C}$

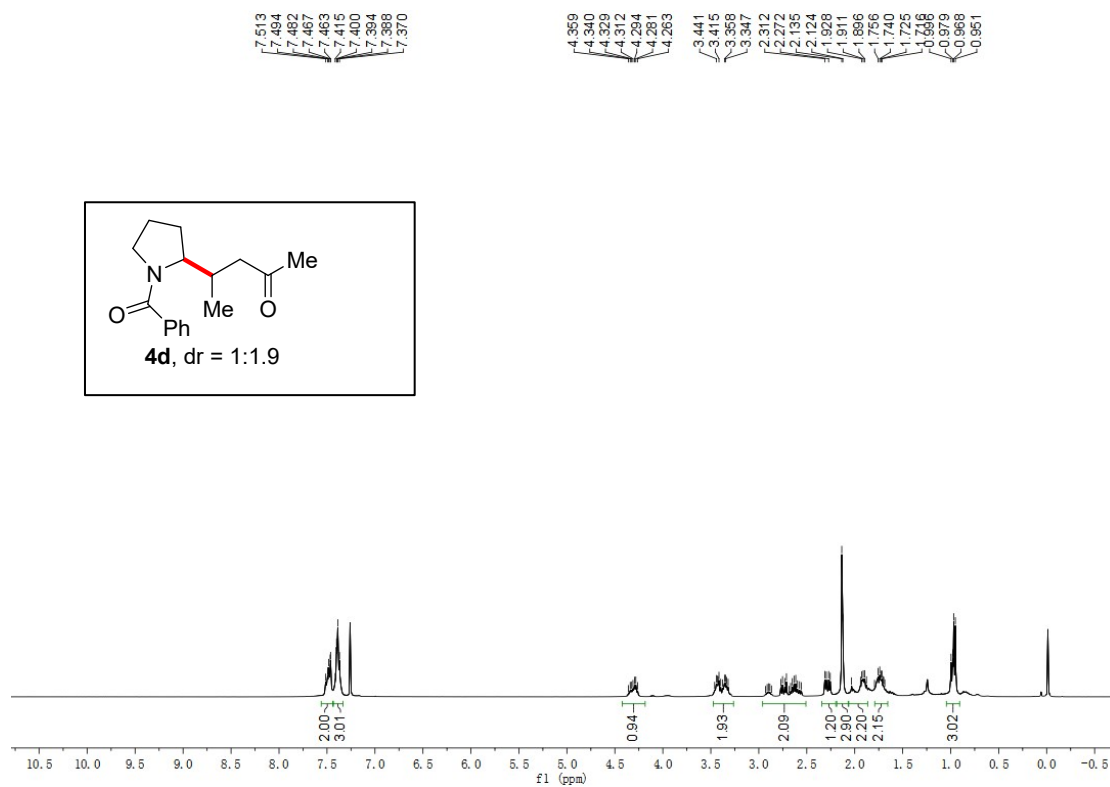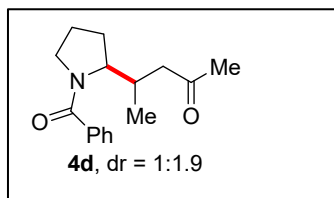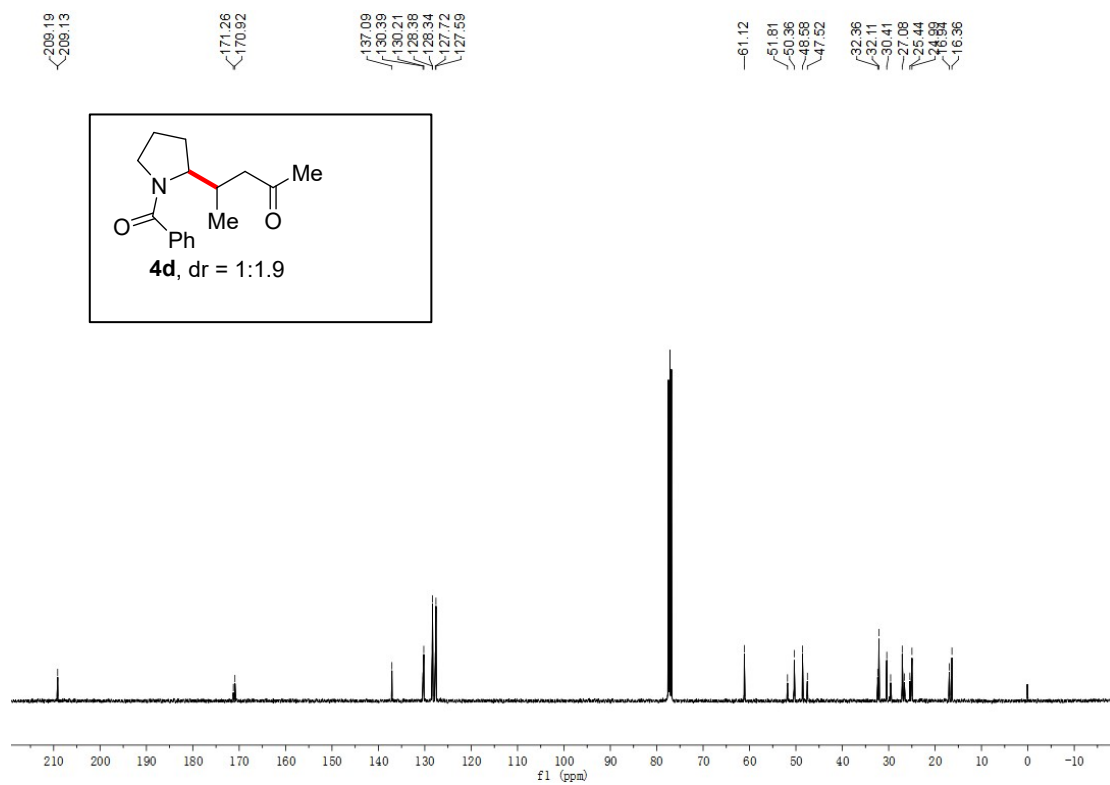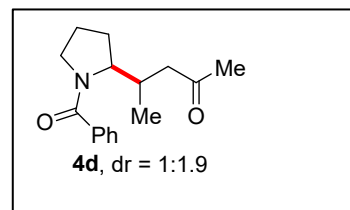

4e,  $^1\text{H}+^{13}\text{C}$

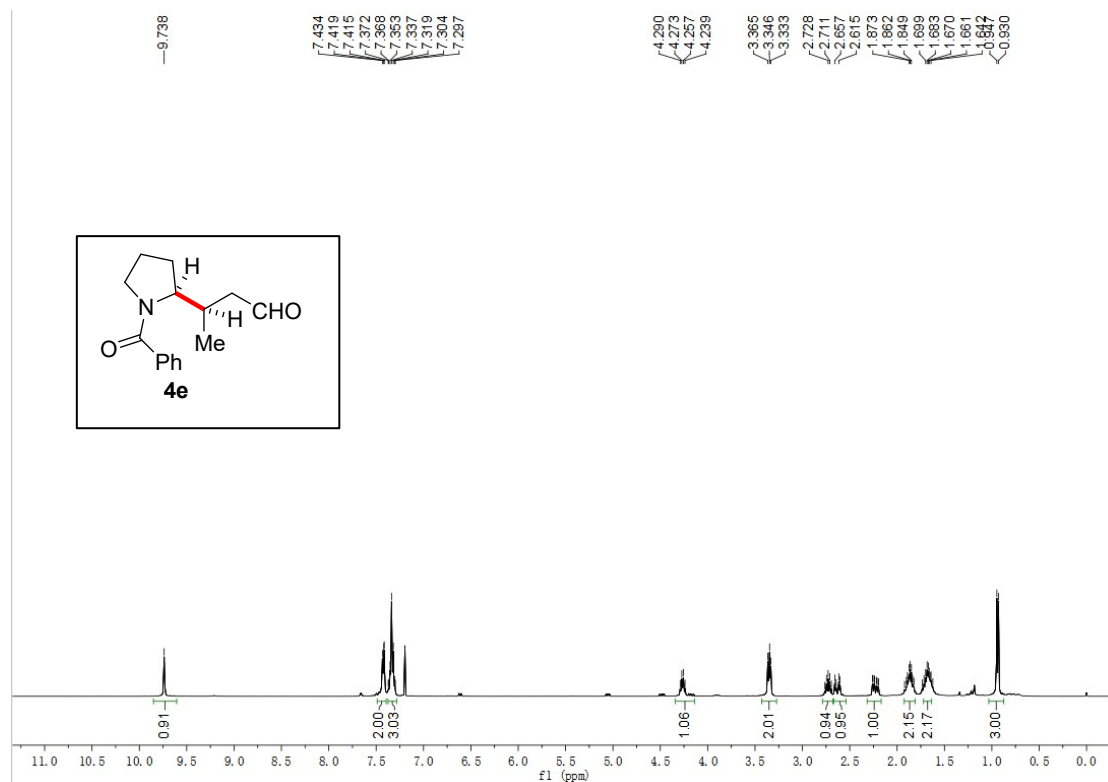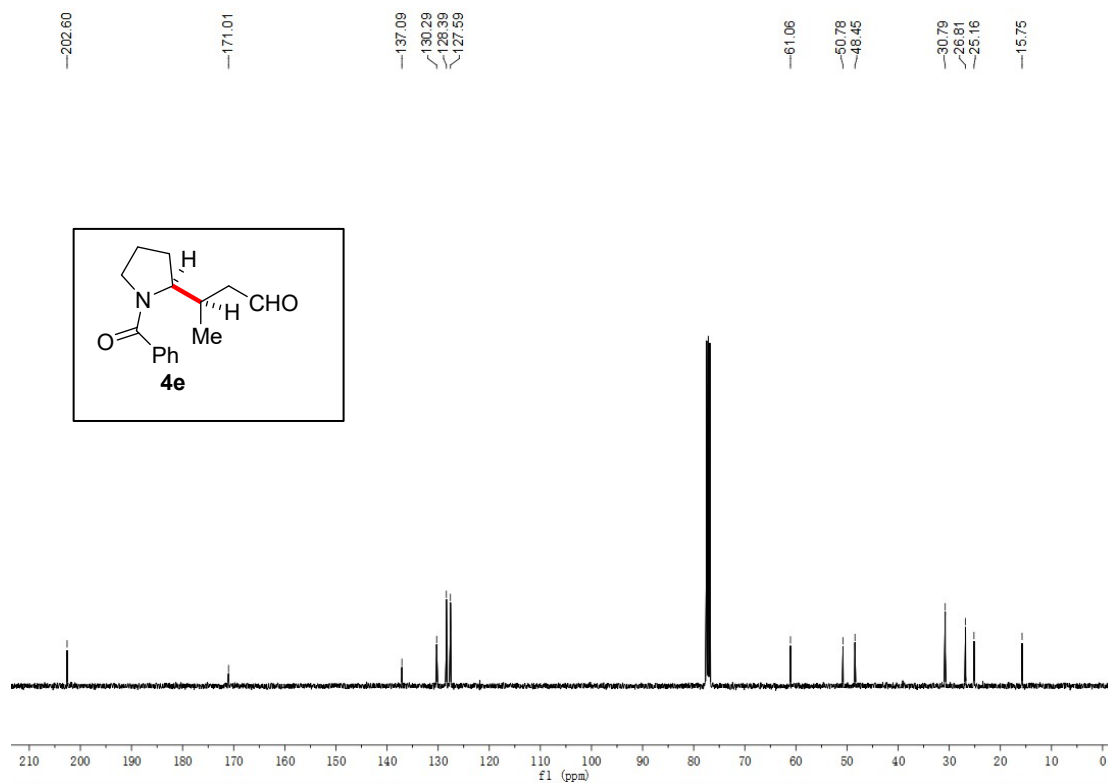

4e', <sup>1</sup>H+<sup>13</sup>C

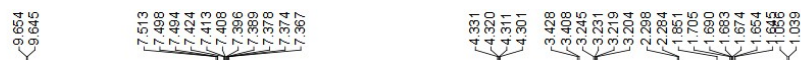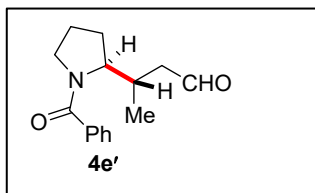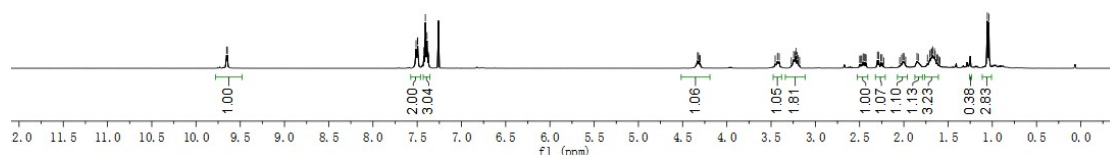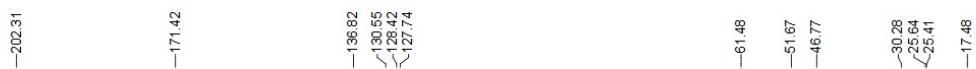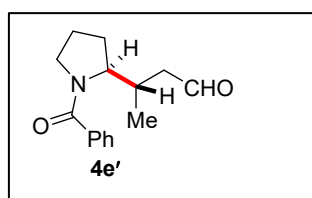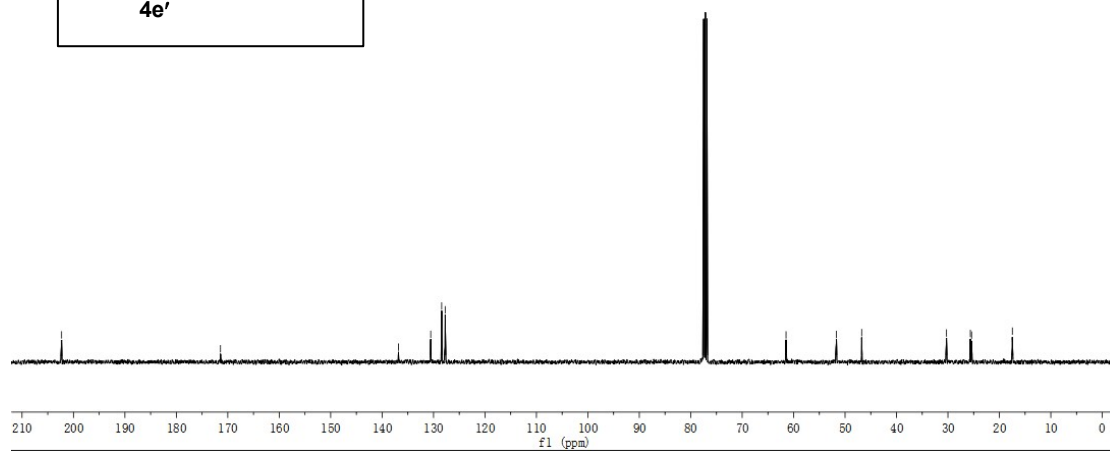

**4f,  $^1\text{H}+^{13}\text{C}$**

7.510  
7.492  
7.460  
7.442  
7.425  
7.418  
7.399  
7.363

4.509  
4.483  
4.480  
4.410  
4.389  
4.363  
4.269  
4.253  
3.510  
3.495  
3.473  
3.446  
3.225  
3.210  
3.102  
3.082  
2.657  
2.635  
2.602  
2.581  
2.559  
2.537  
2.443  
2.421  
2.400  
2.176  
2.164  
2.158  
2.146  
2.134  
2.116  
2.106  
1.890  
1.806  
1.502  
1.472  
1.471  
1.705  
1.688  
1.676  
1.652

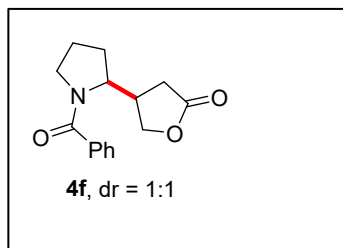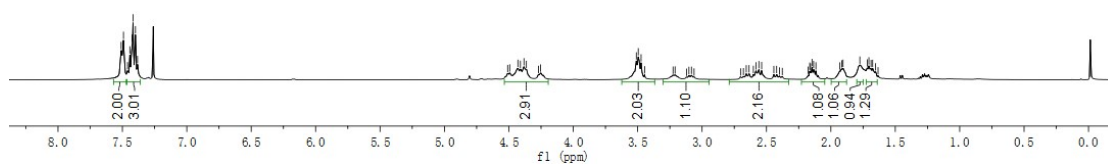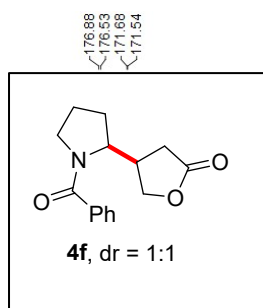

176.88  
176.53  
171.68  
171.54

136.41  
136.39  
130.61  
130.57  
128.41  
127.53  
127.46

71.79  
69.87  
58.52  
58.32  
51.65  
51.15  
40.18  
38.61  
31.78  
31.41  
28.56  
27.69  
25.10

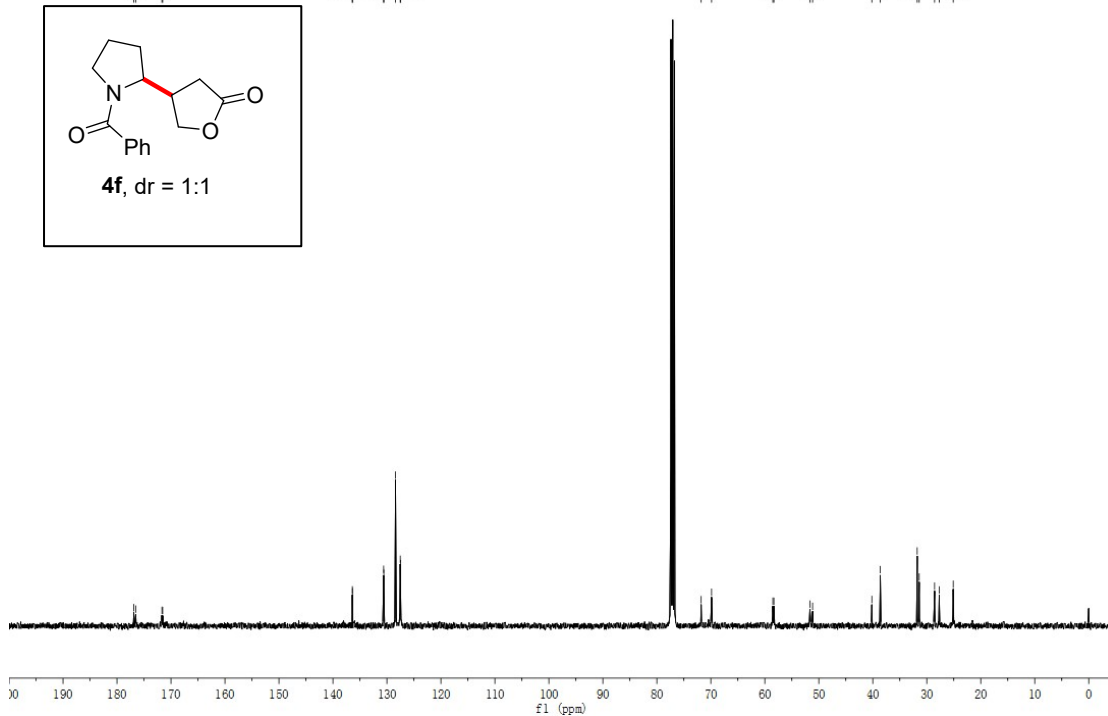

4g,  $^1\text{H}+^{13}\text{C}$

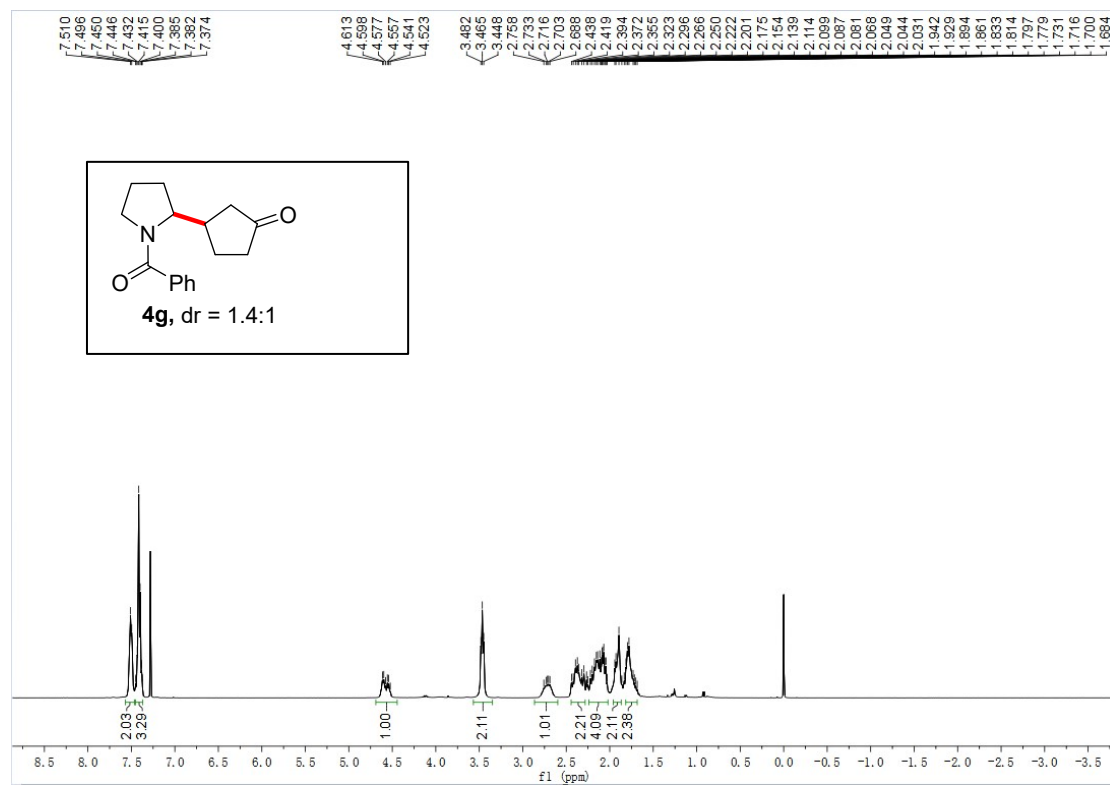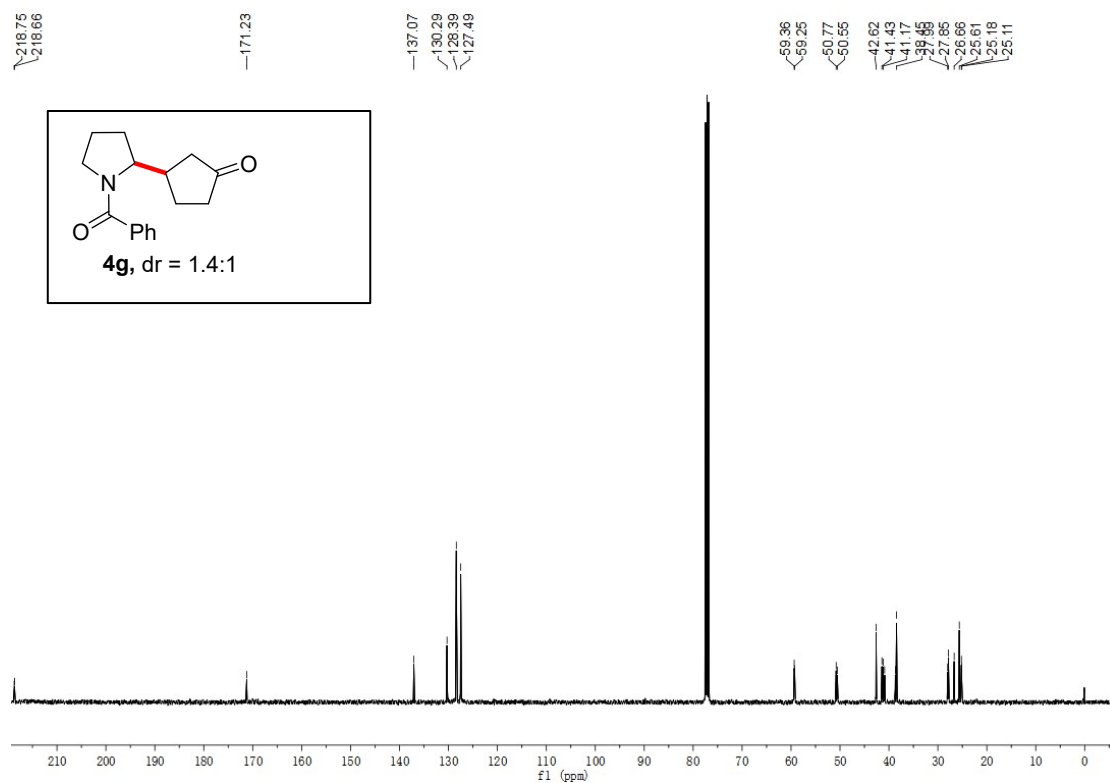

4h,  $^1\text{H}+^{13}\text{C}$

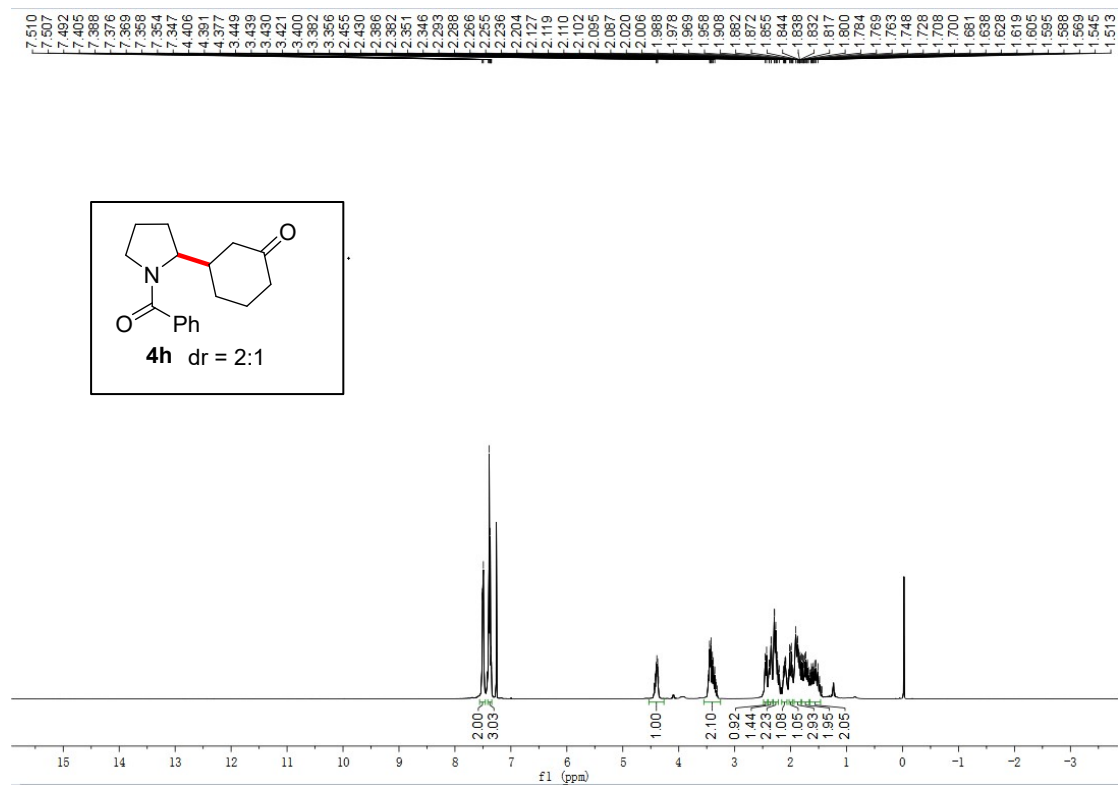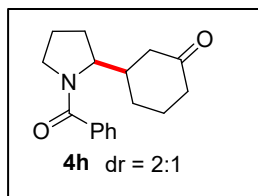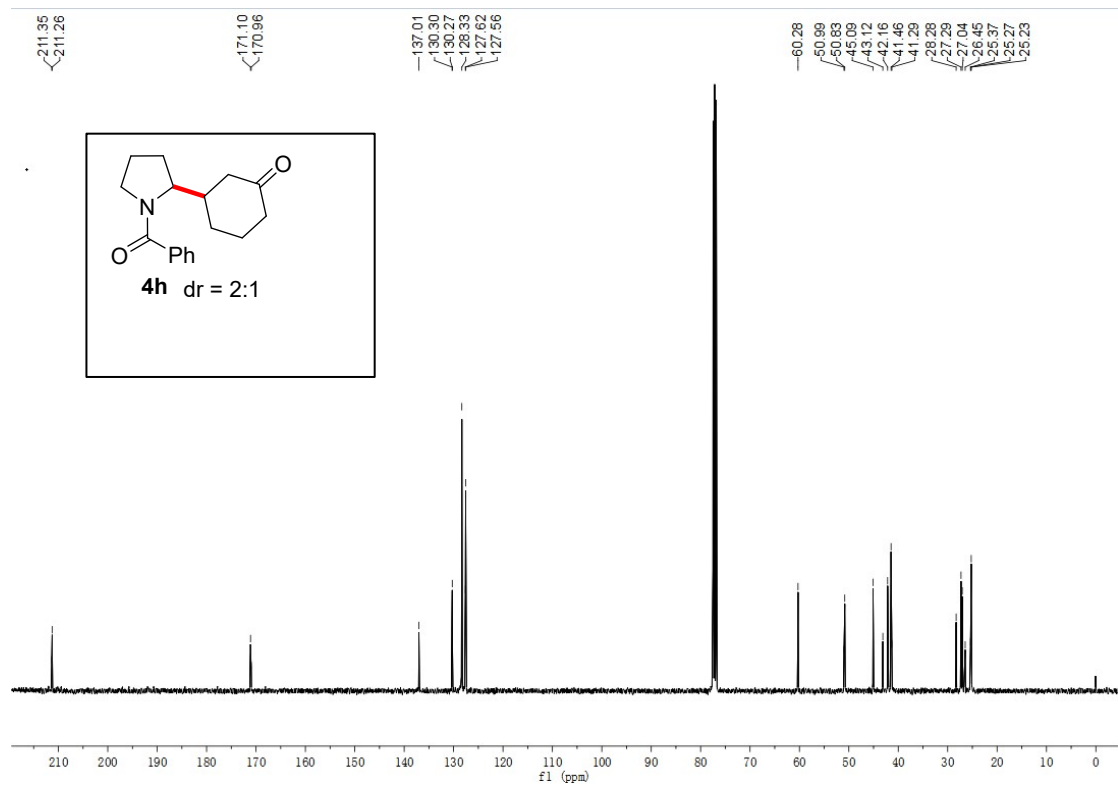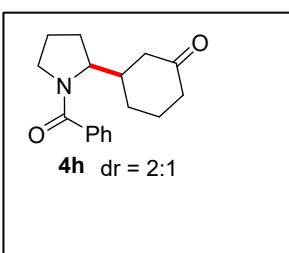

4i,  $^1\text{H}+^{13}\text{C}$

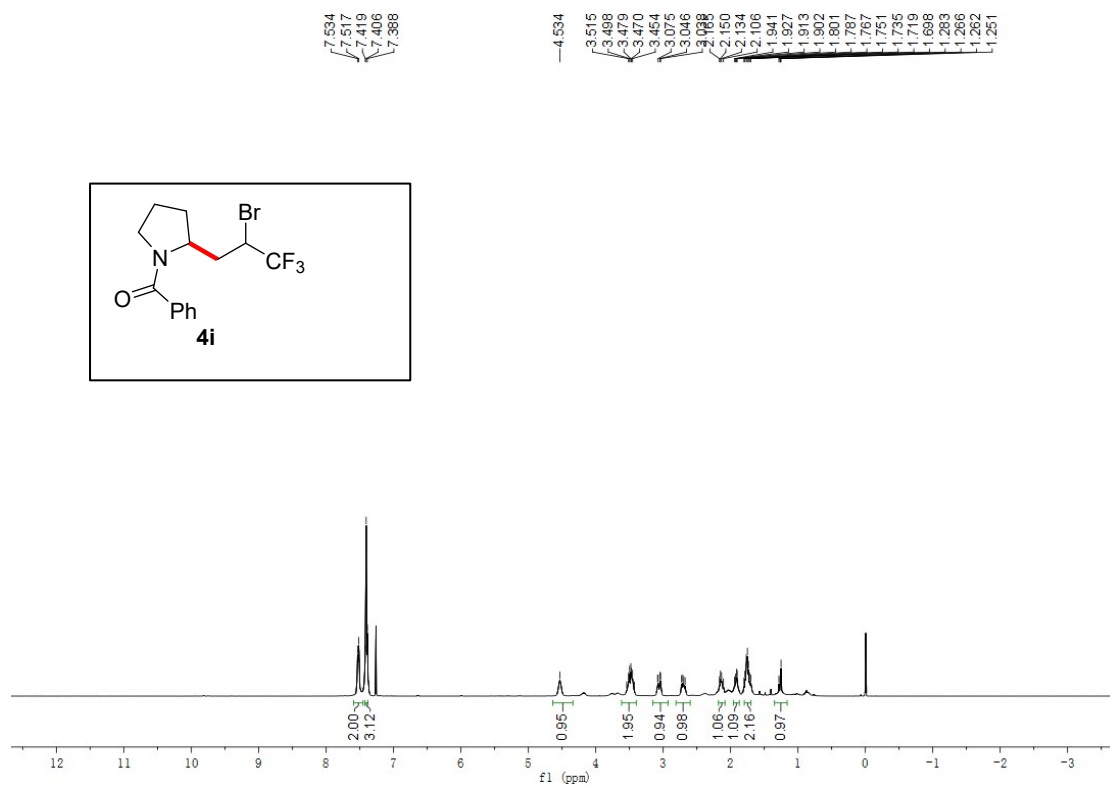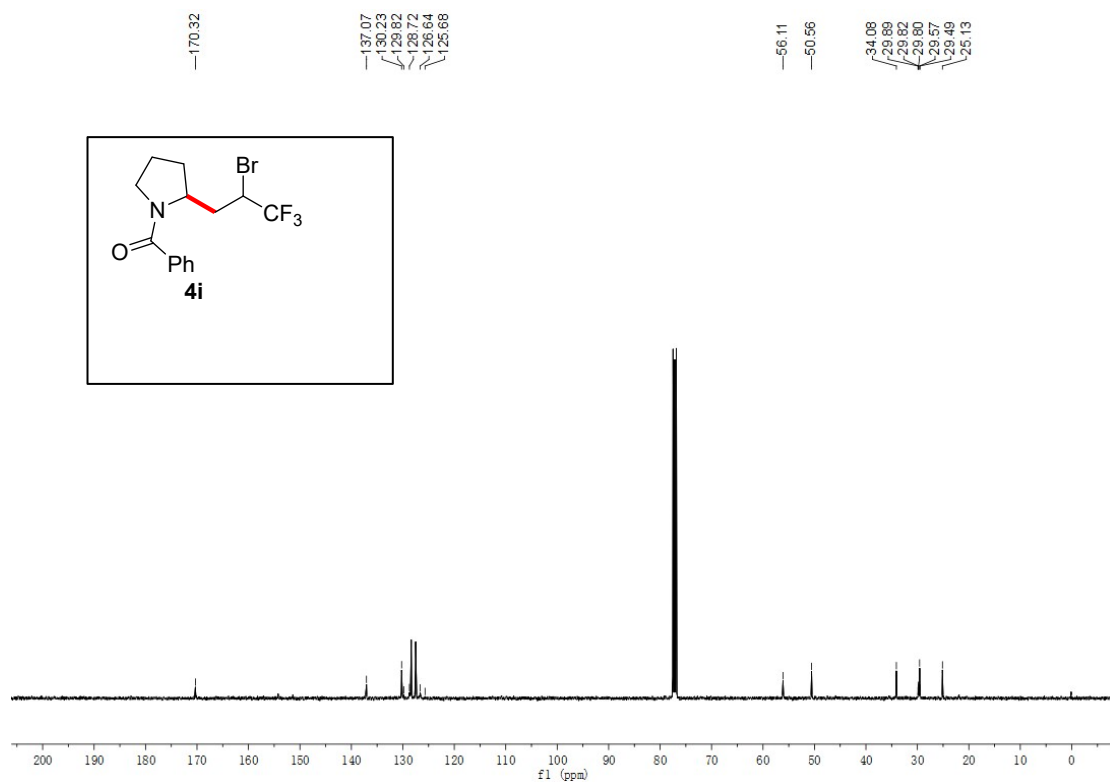

**4i, <sup>19</sup>F**

82.44  
82.55

88.94  
89.05

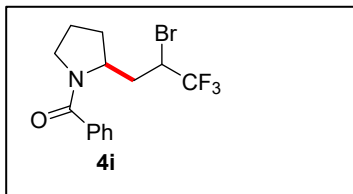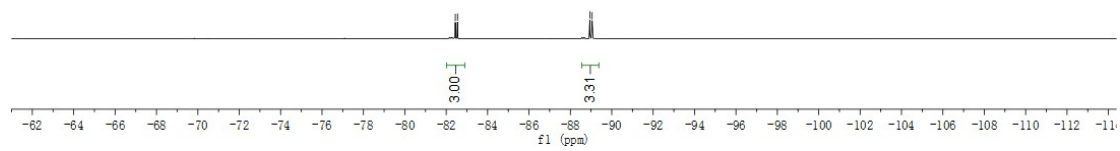



4j,  $^1\text{H}+^{13}\text{C}$

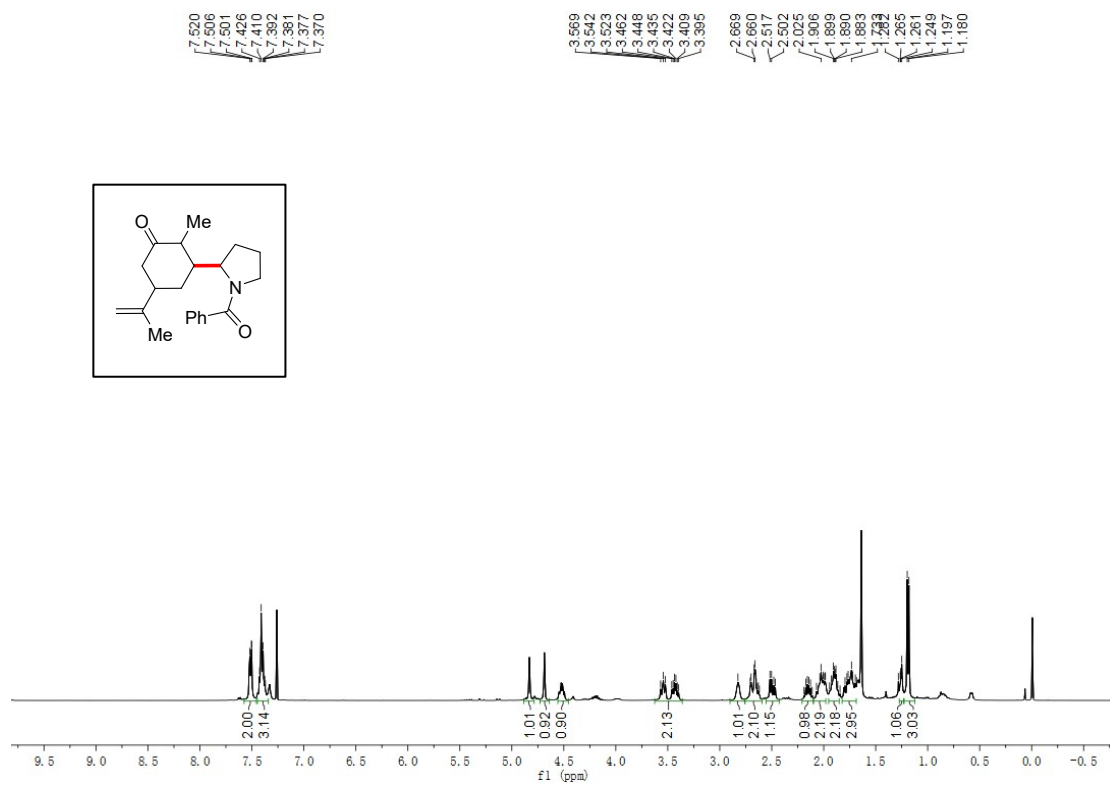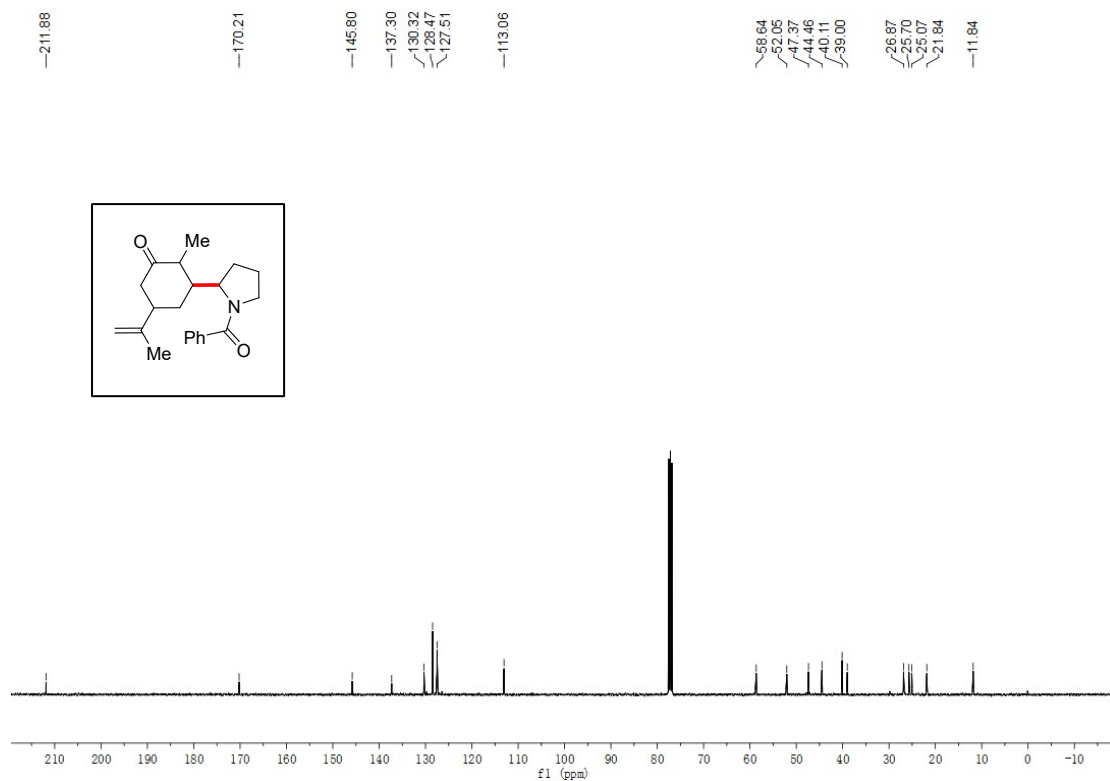

4k,  $^1\text{H}+^{13}\text{C}$

8.425  
8.412  
7.406  
7.408  
7.349  
7.333  
7.328  
7.314  
7.299  
7.138  
7.126  
4.273  
4.236  
3.408  
3.392  
3.375  
2.880  
2.860  
2.840  
2.373  
2.352  
2.341  
2.330  
2.319  
2.309  
2.113  
2.089  
2.081  
2.071  
2.052  
1.864  
1.838  
1.742  
1.723  
1.704  
1.689  
1.689  
1.665

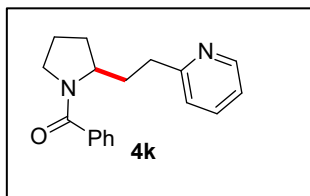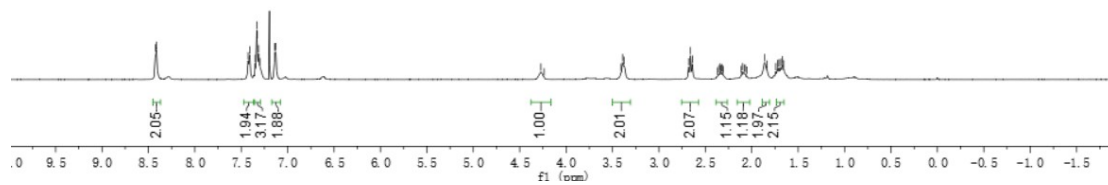

170.29  
161.71  
149.01  
137.51  
136.82  
130.01  
128.33  
127.46  
123.11  
121.29  
57.22  
50.28  
34.87  
33.79  
30.46  
28.25

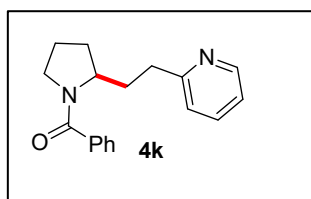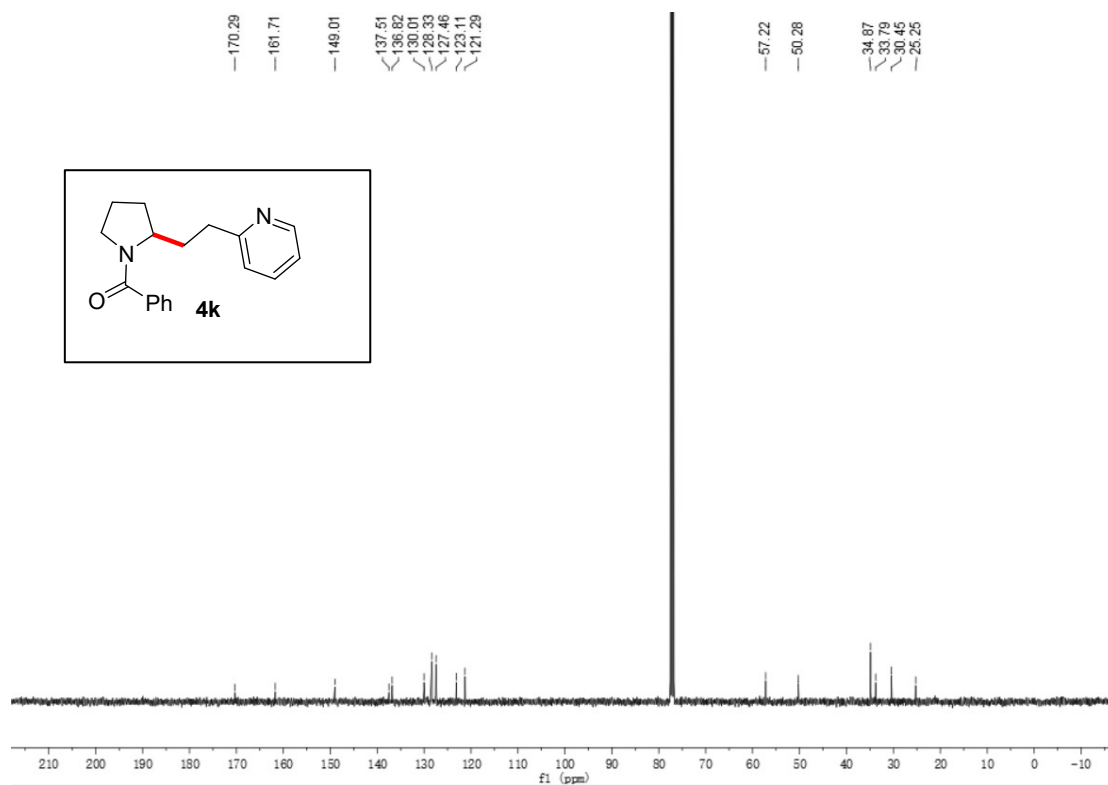

4I,  $^1\text{H}+^{13}\text{C}$

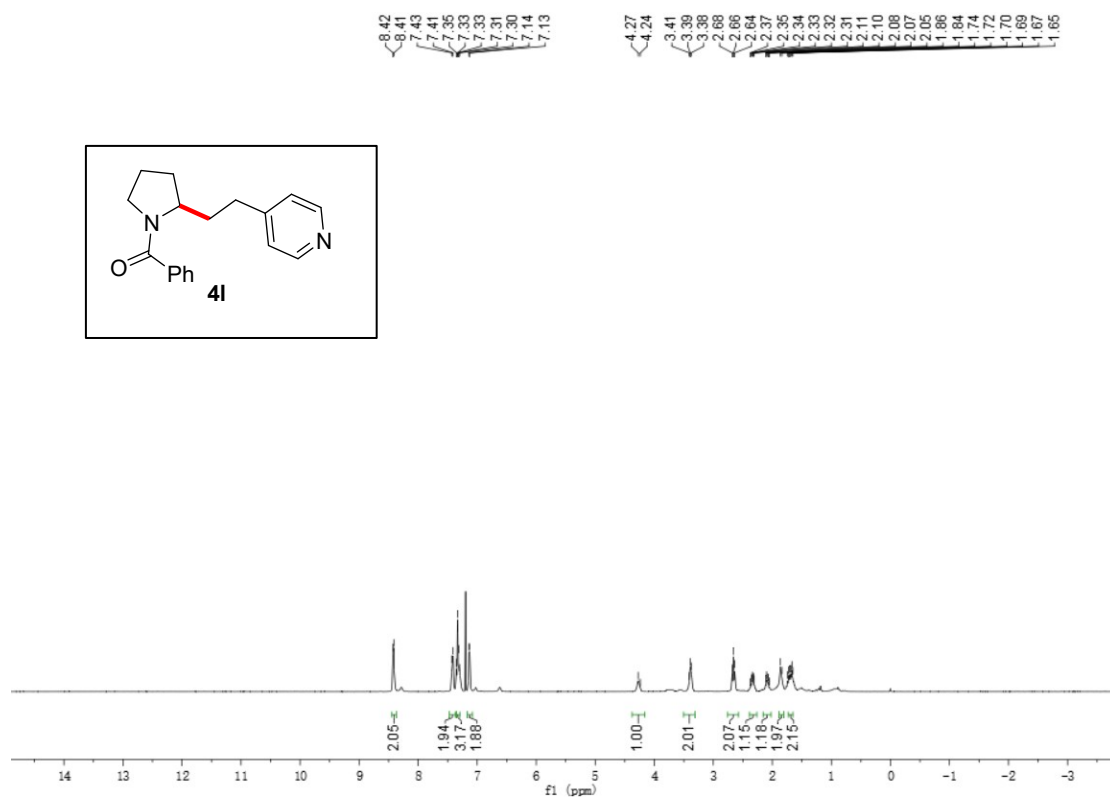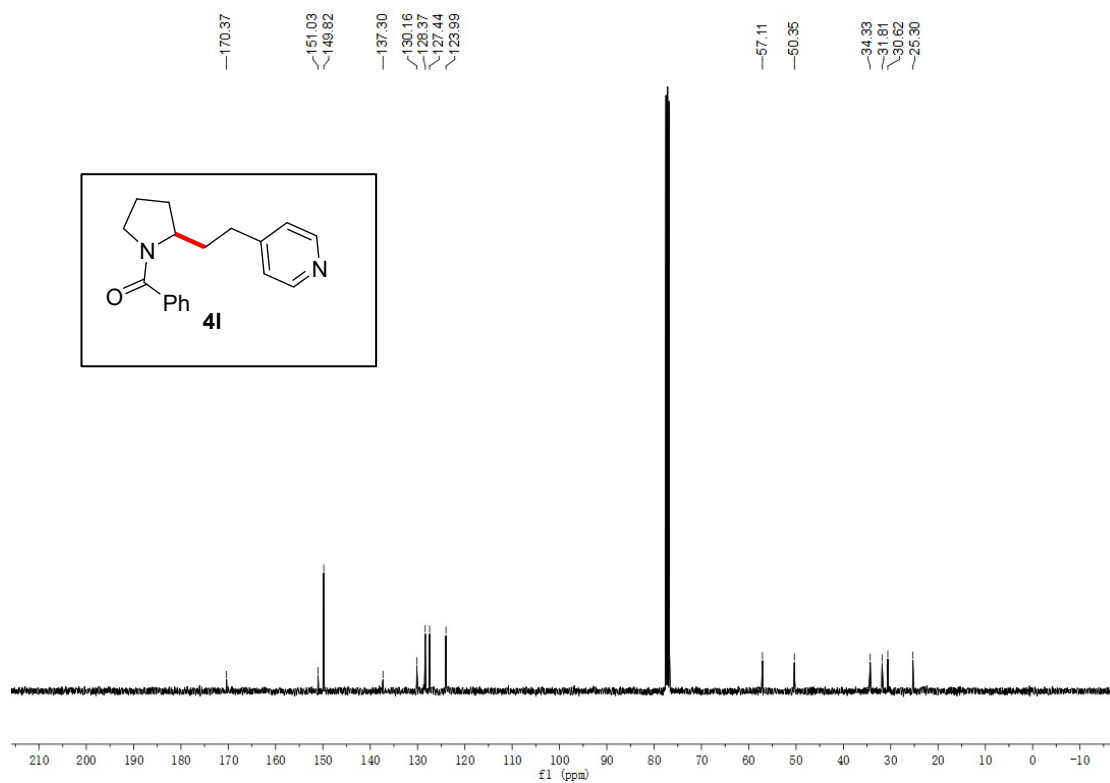

4m,  $^1\text{H}+^{13}\text{C}$

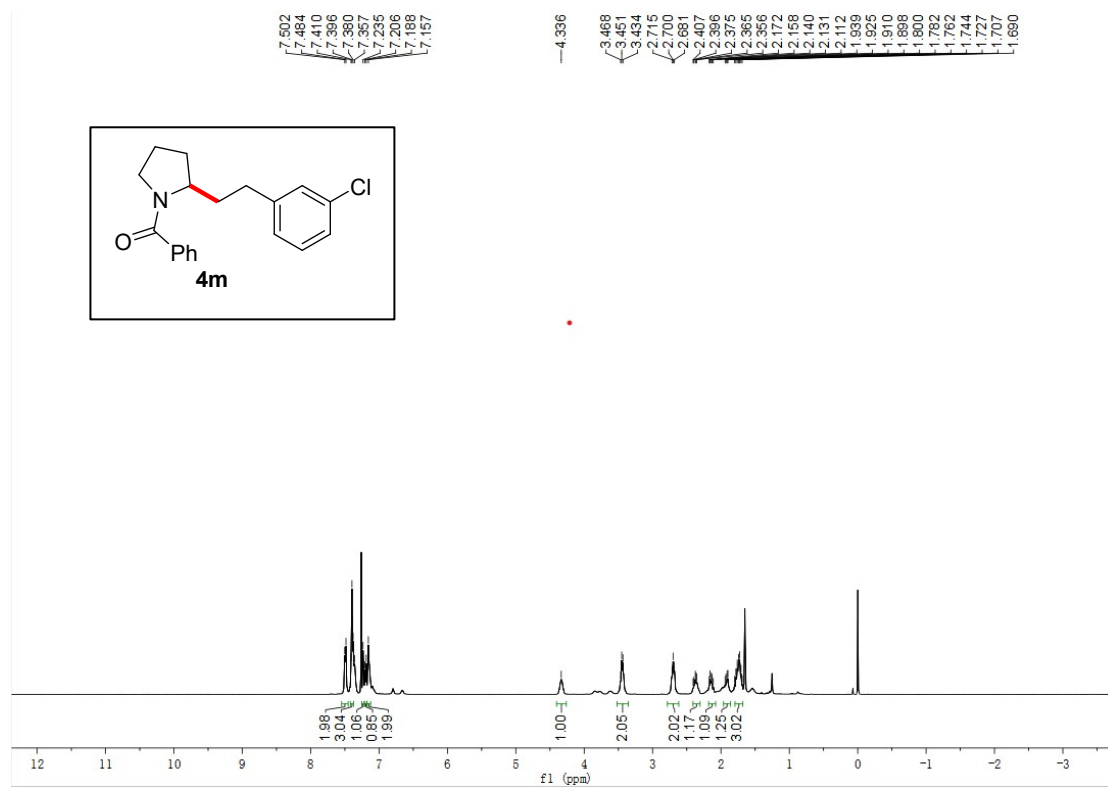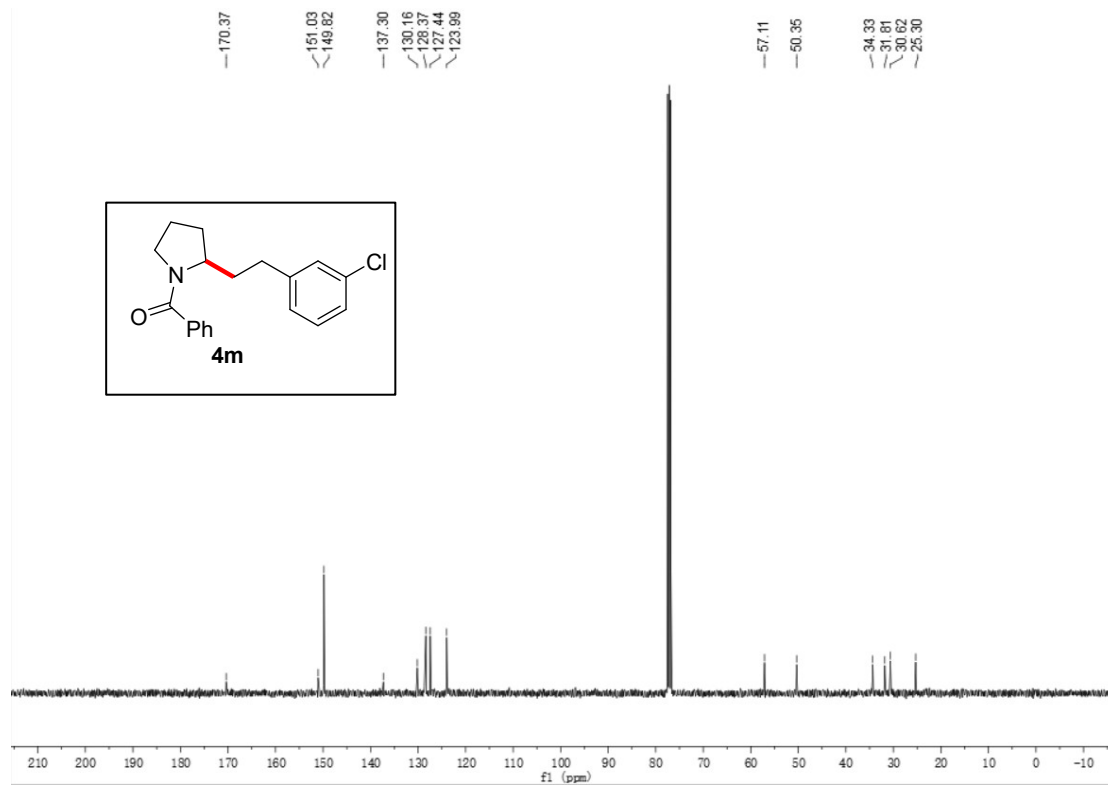

4n,  $^1\text{H}+^{13}\text{C}$

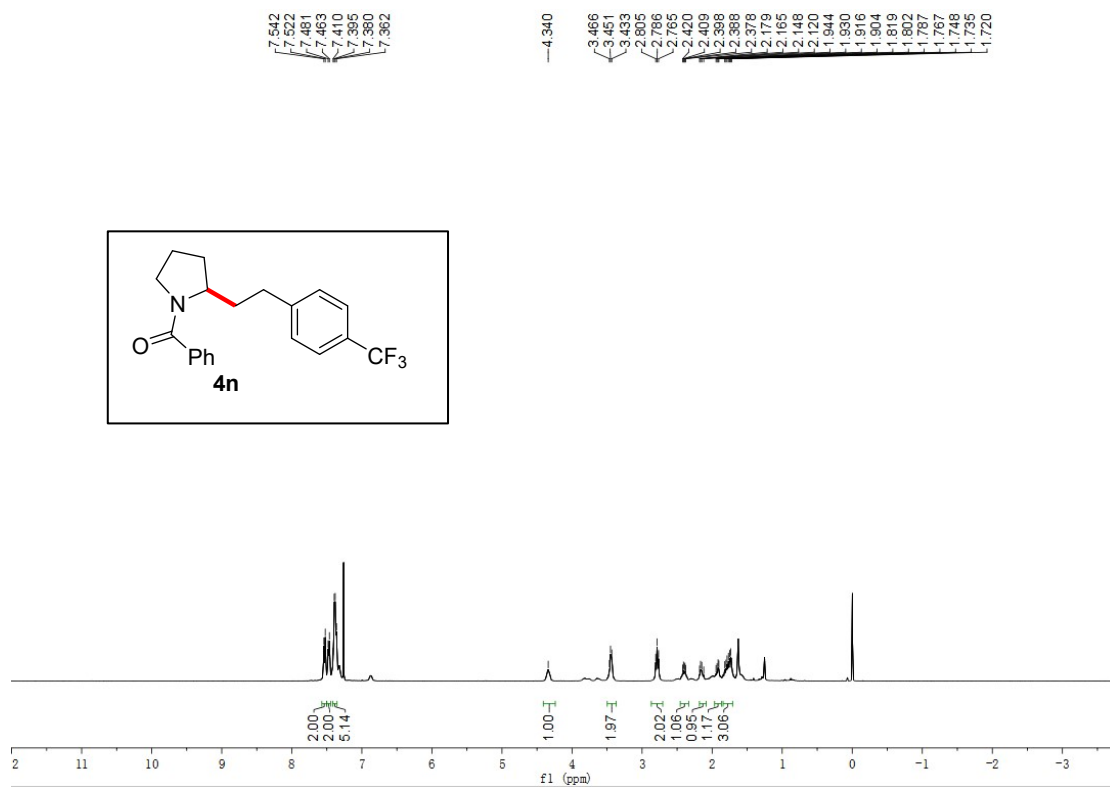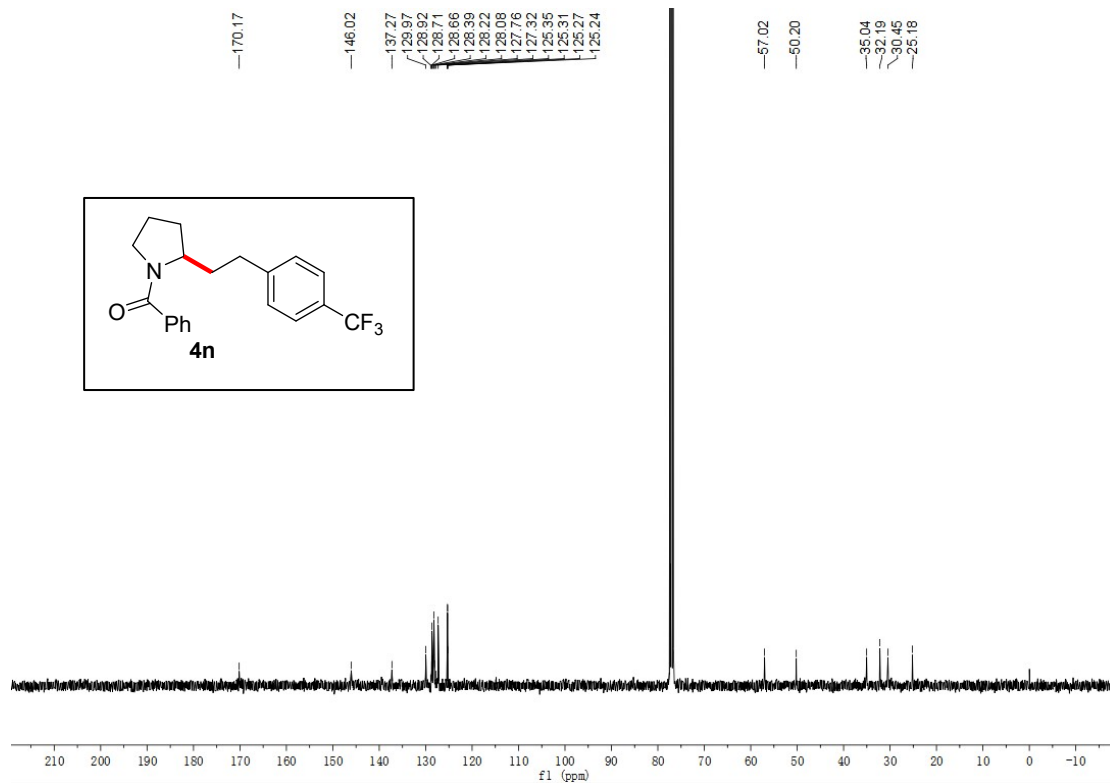

**4n, <sup>19</sup>F**

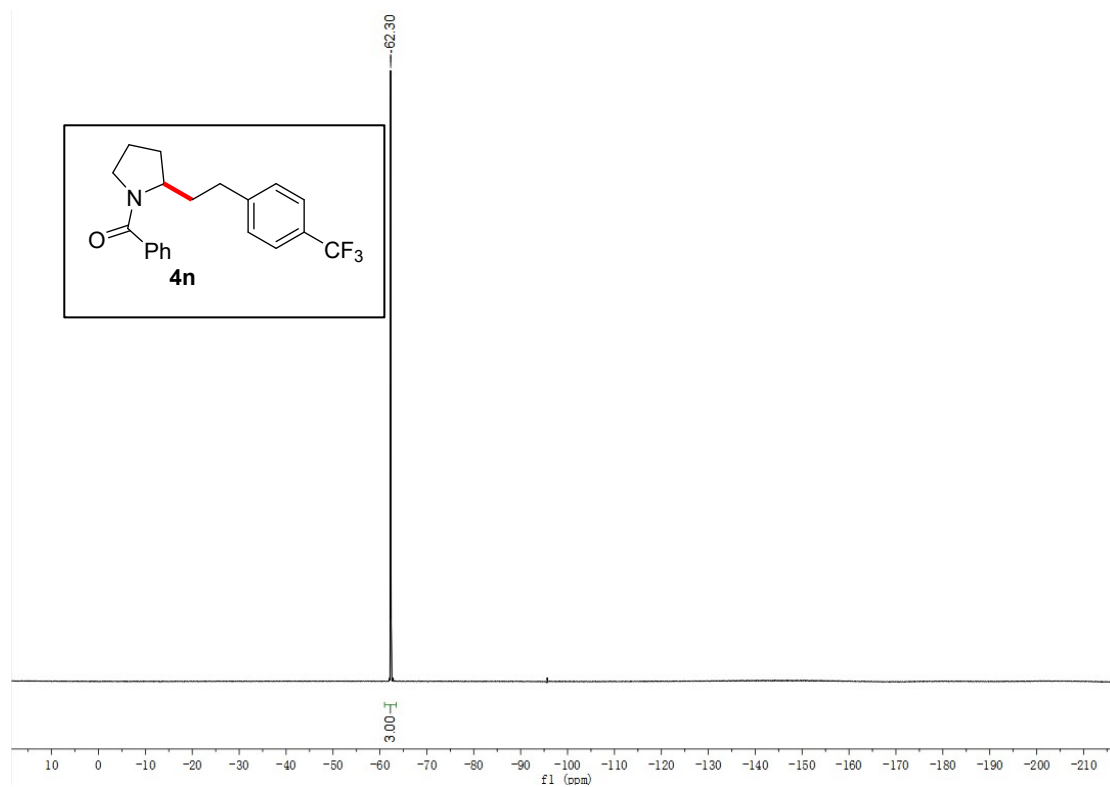

4o,  $^1\text{H}+^{13}\text{C}$

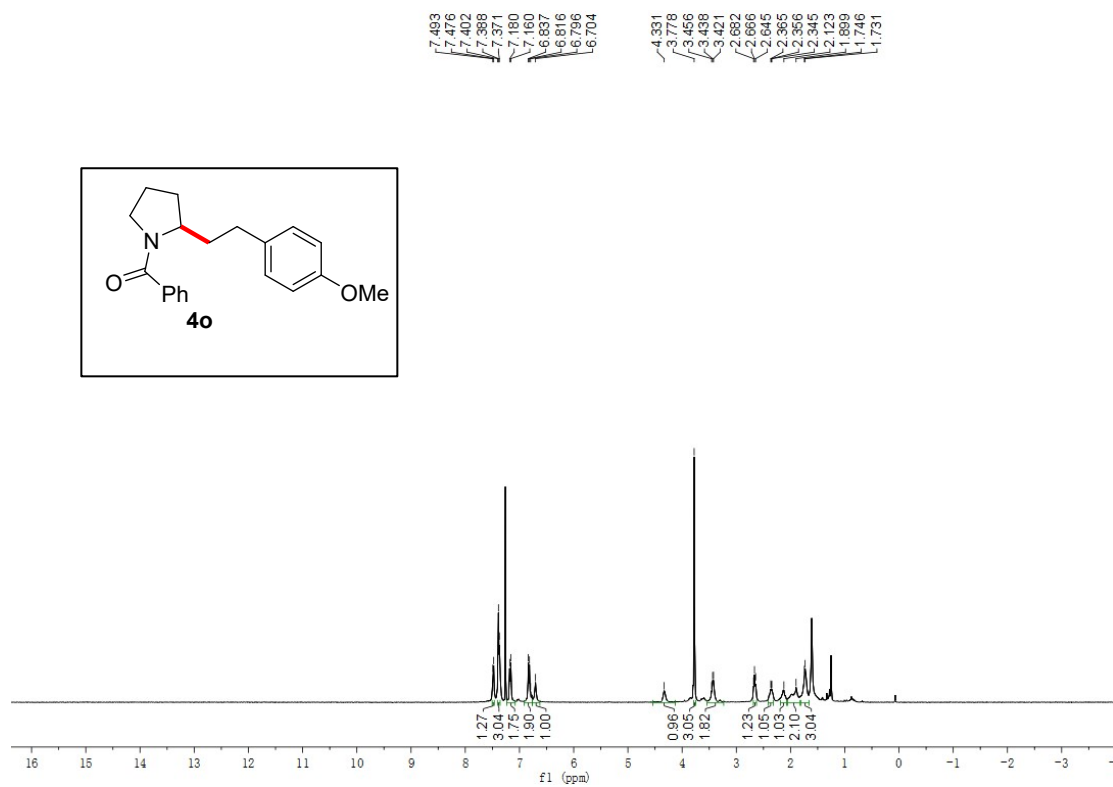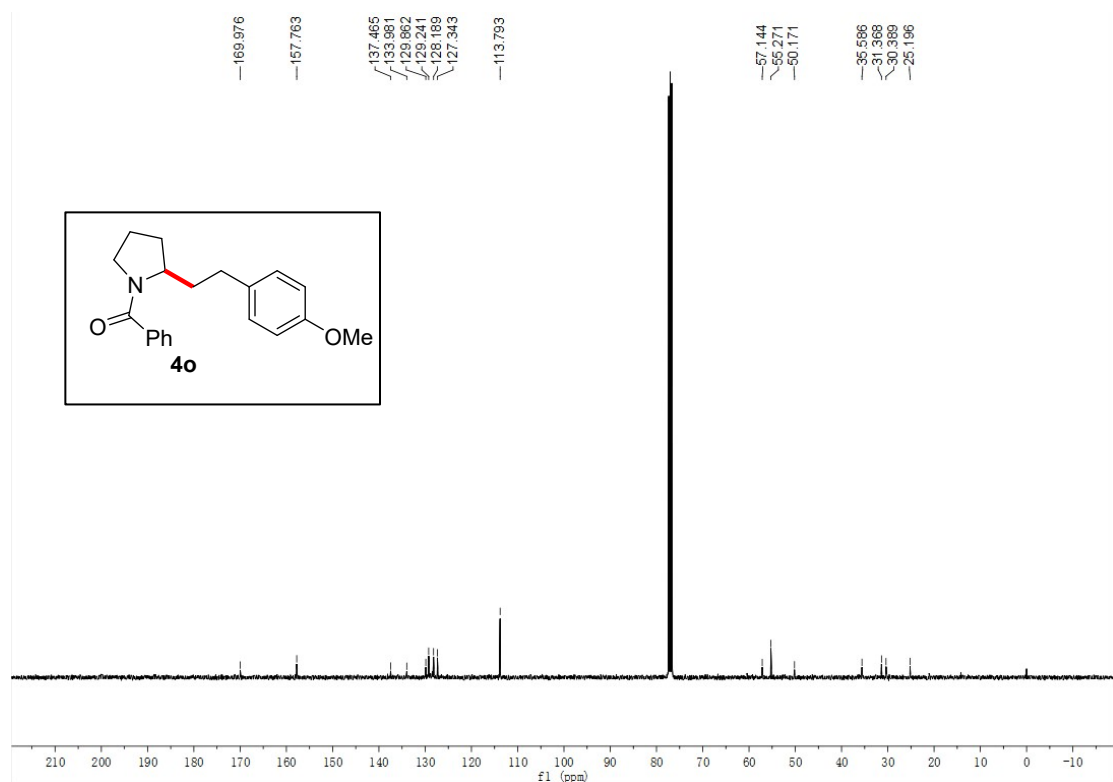

4r,  $^1\text{H}+^{13}\text{C}$

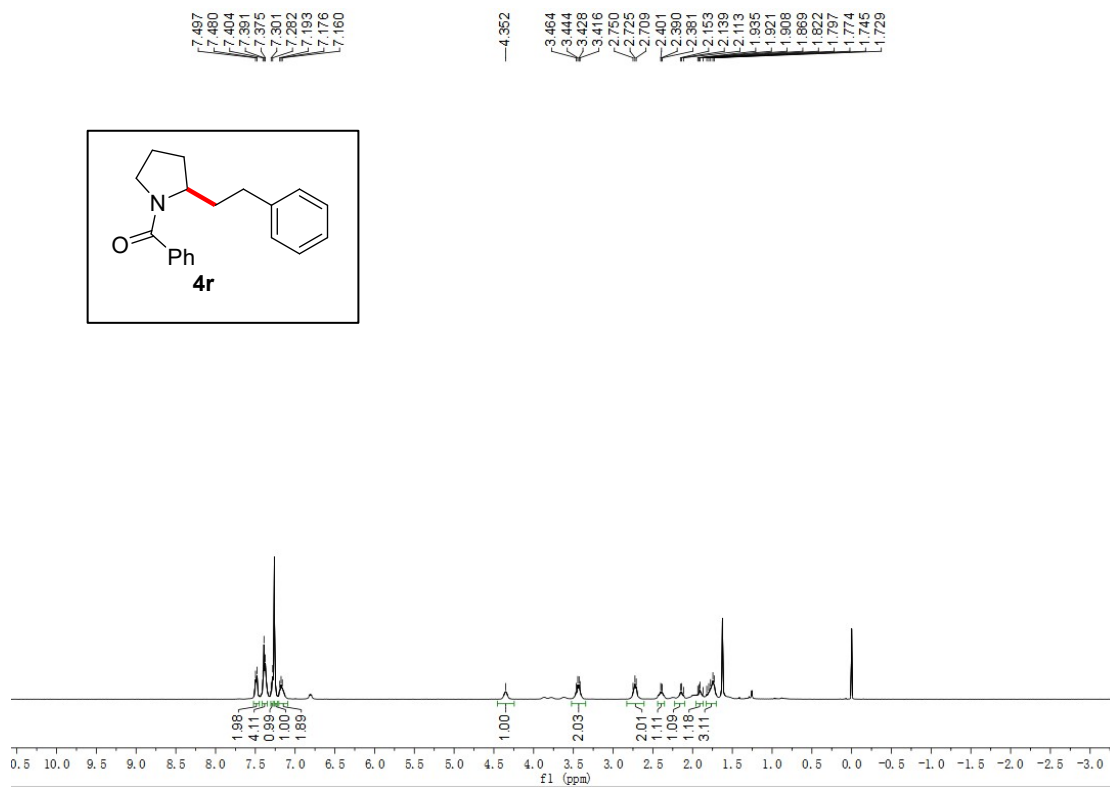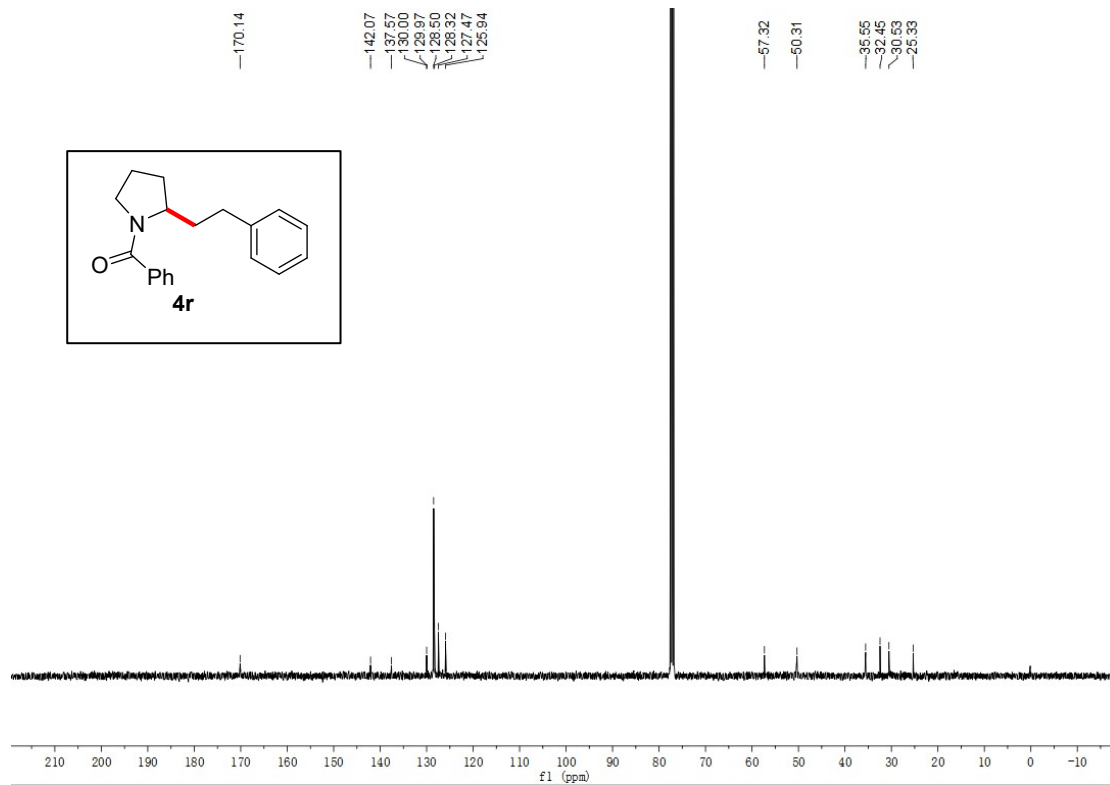



5a, <sup>1</sup>H+<sup>13</sup>C

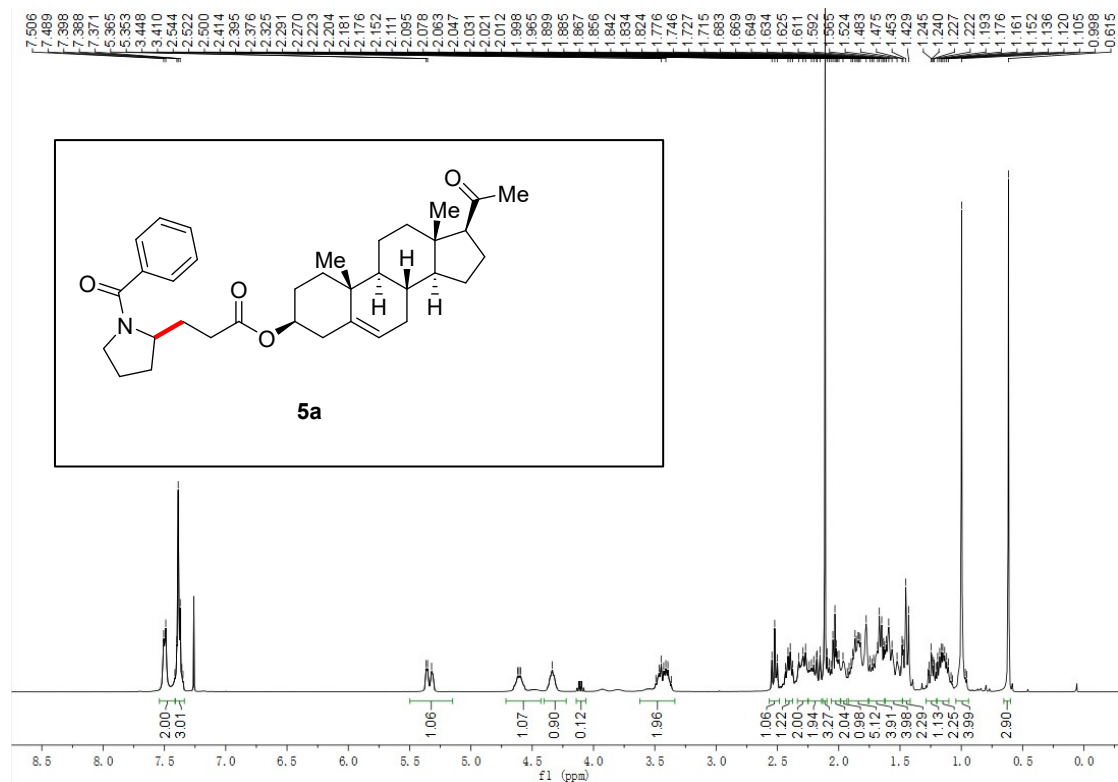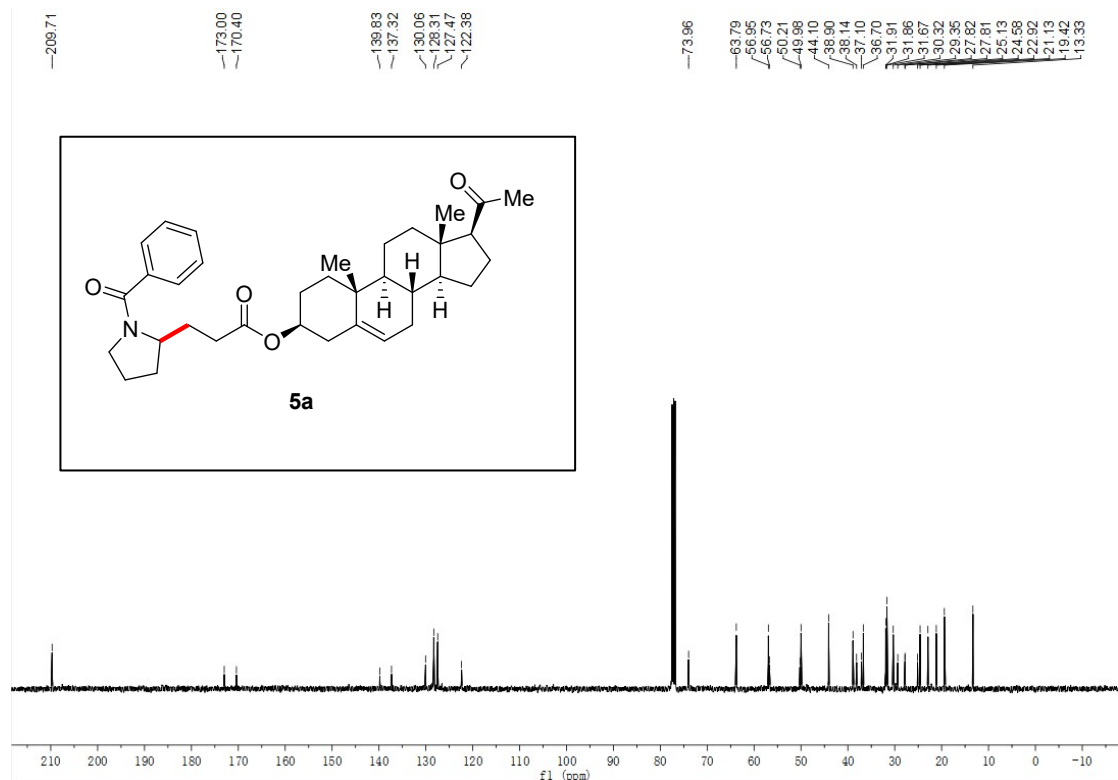

**5b, <sup>1</sup>H+<sup>13</sup>C**

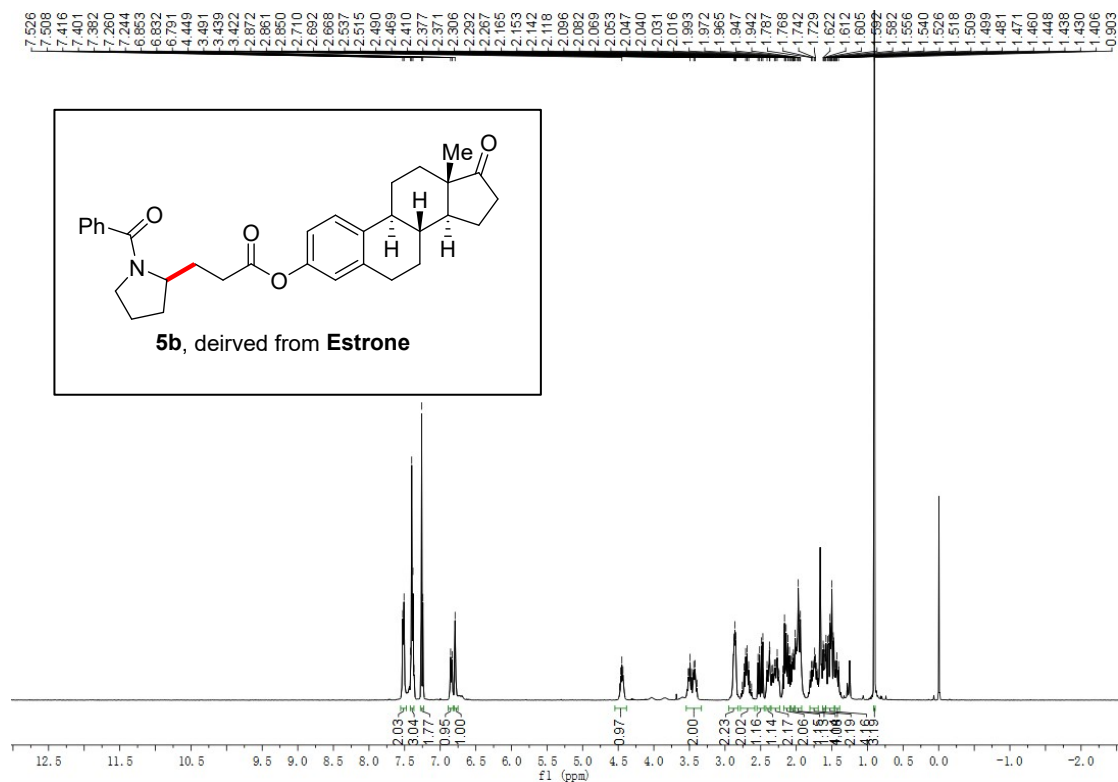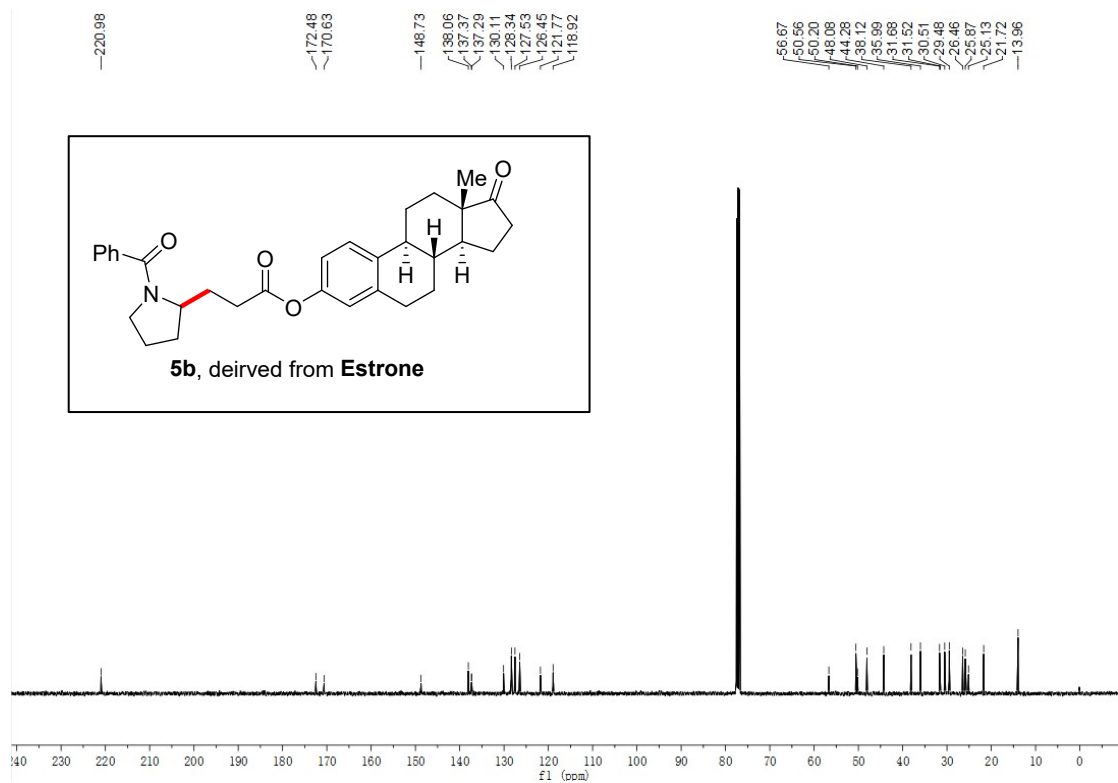

**5c, <sup>1</sup>H+<sup>13</sup>C**

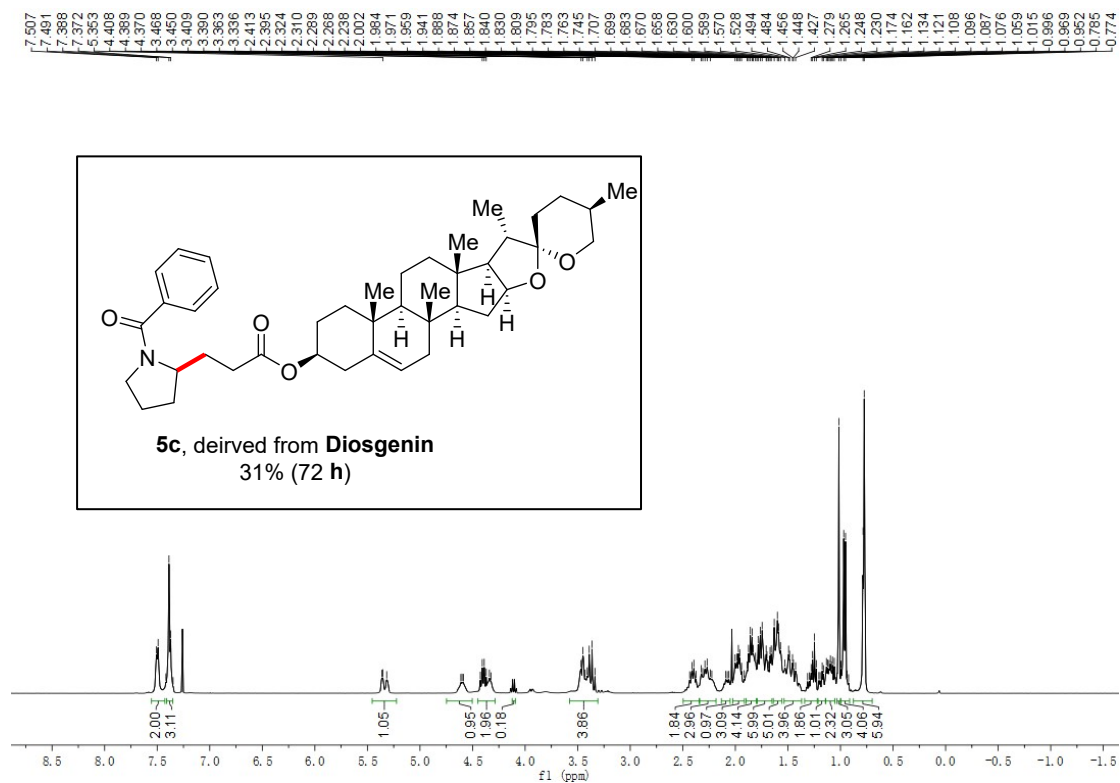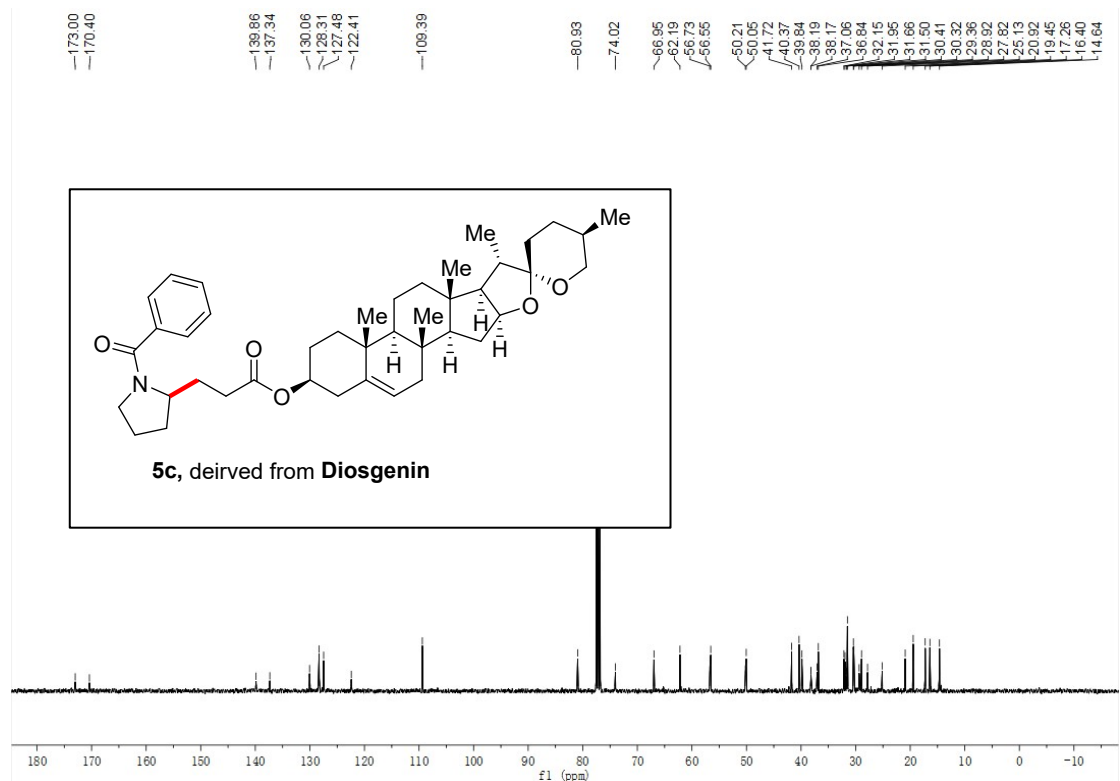

5d,  $^1\text{H}+^{13}\text{C}$

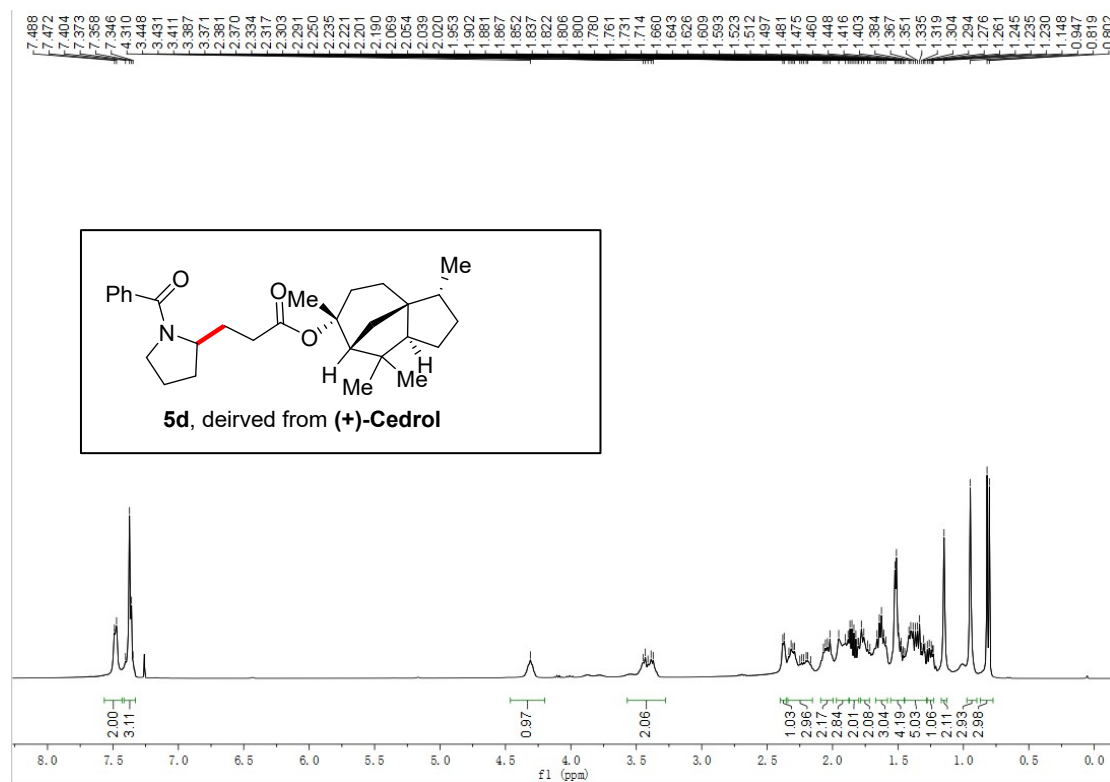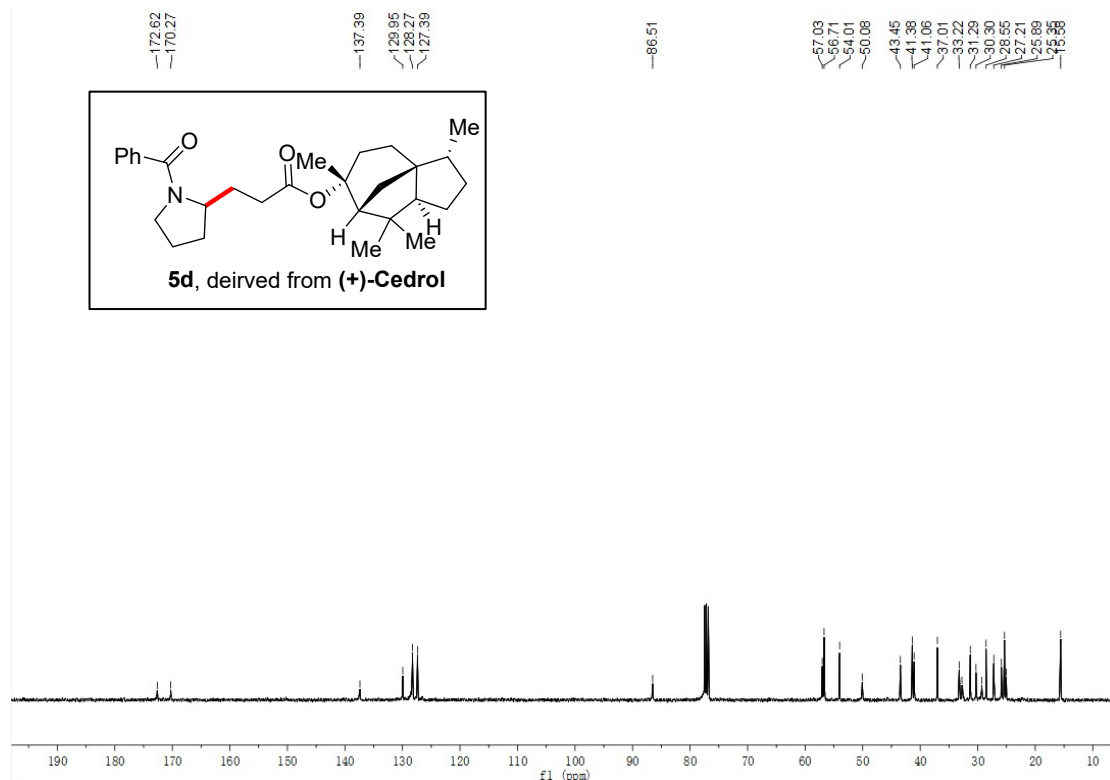

5e, <sup>1</sup>H+<sup>13</sup>C

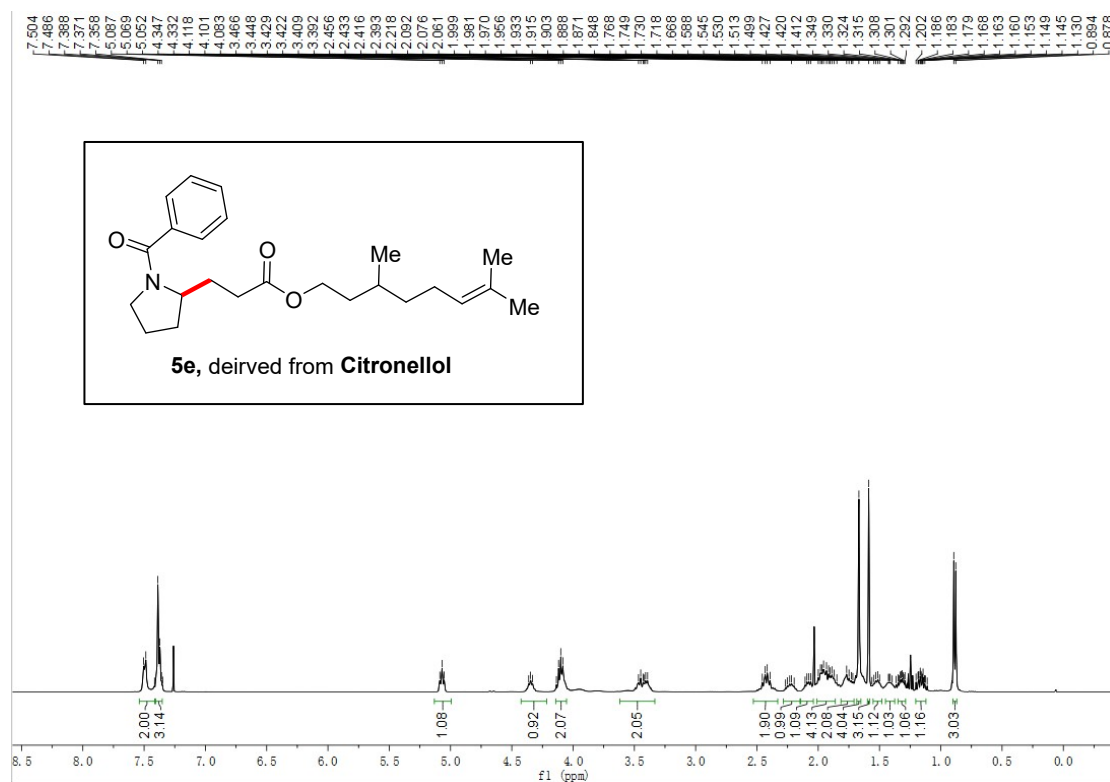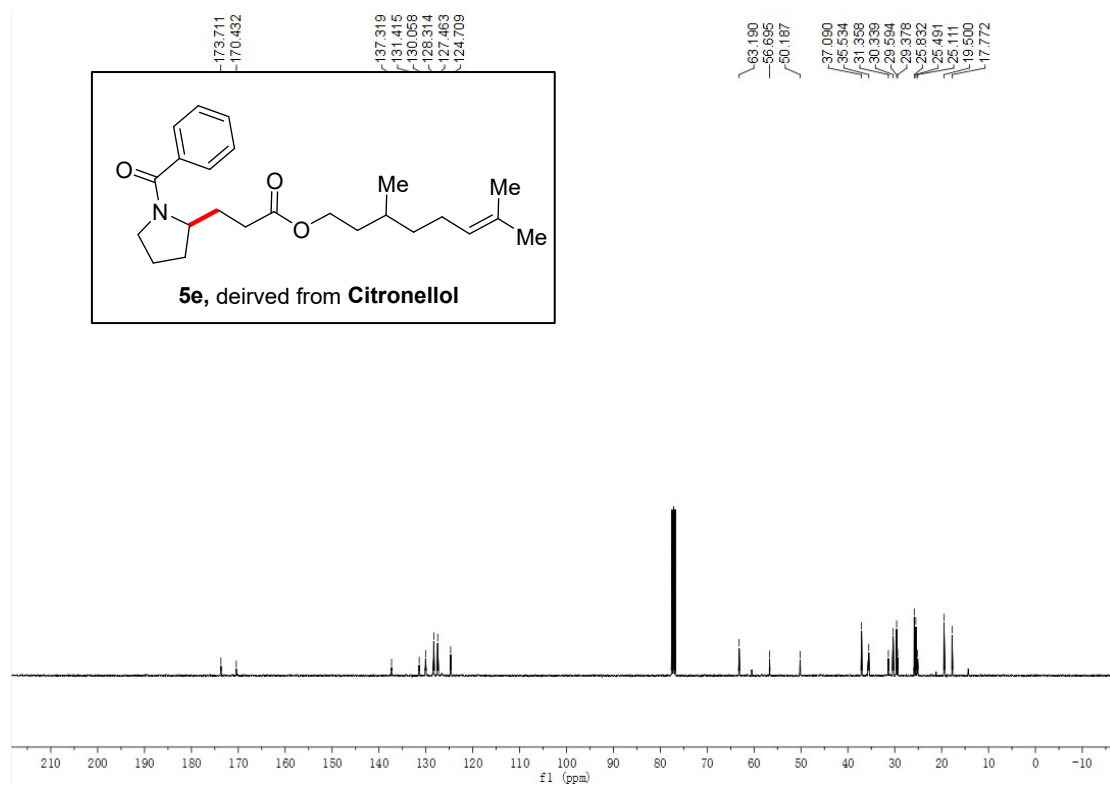

5f,  $^1\text{H}+^{13}\text{C}$

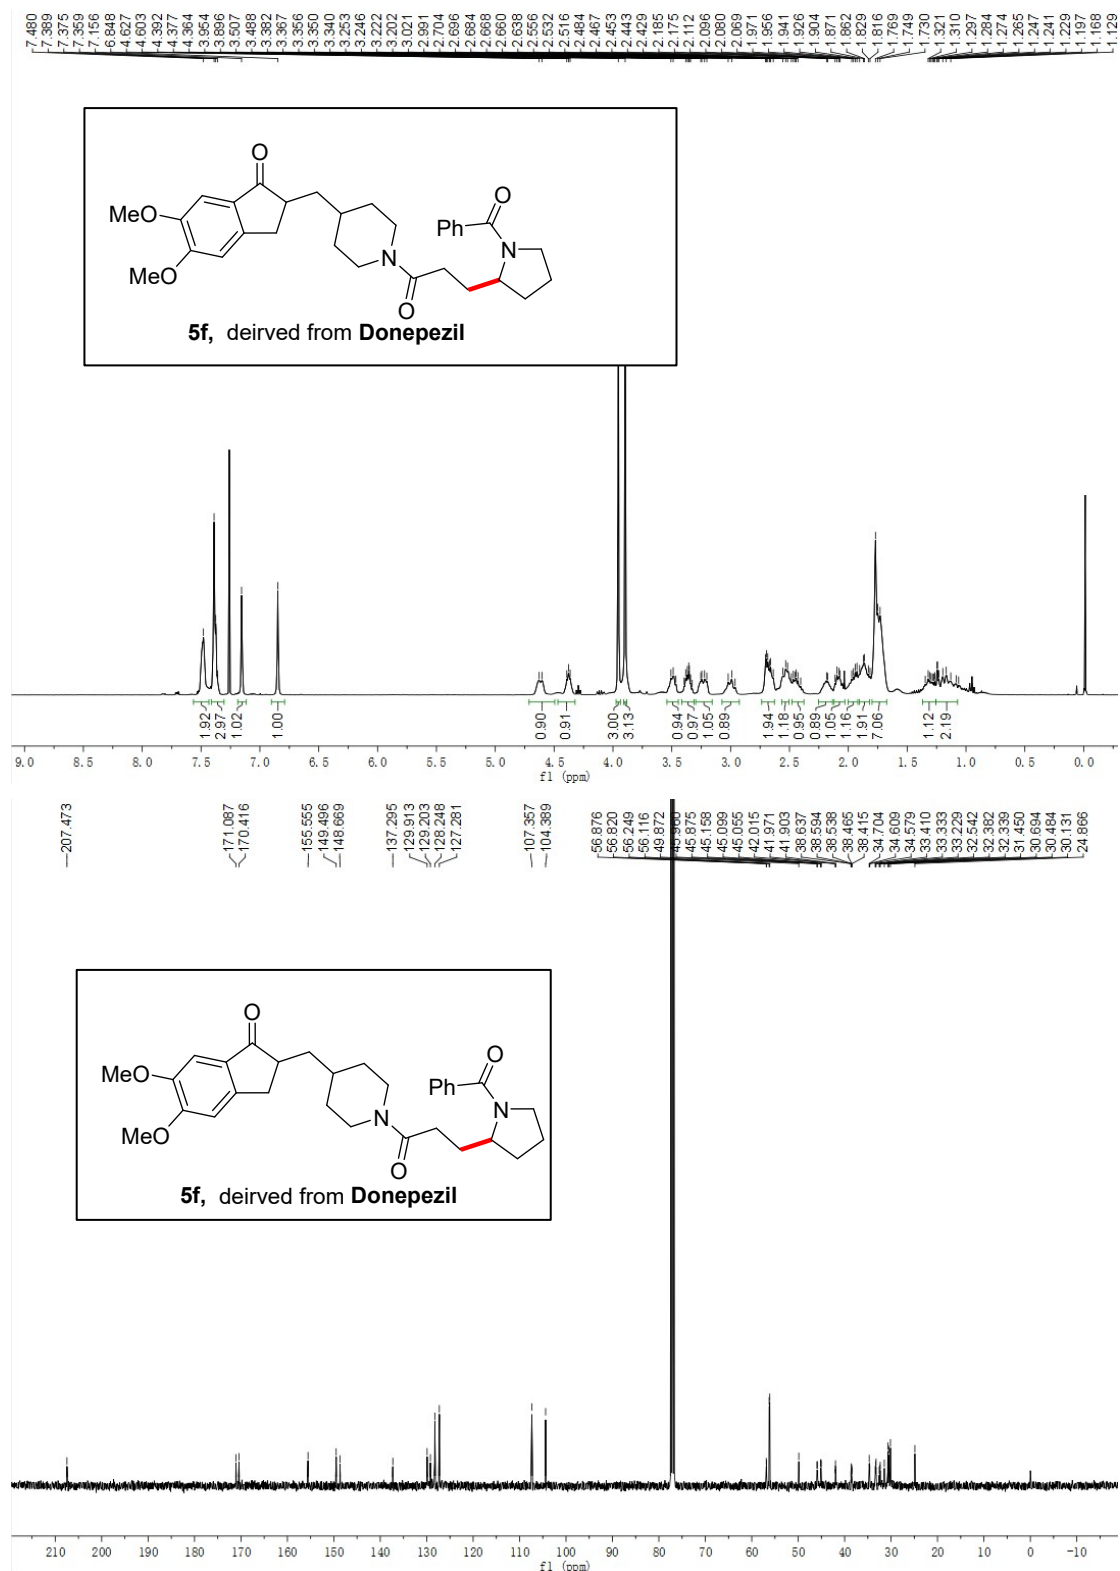

Supplement: d3qo00914a1.pdf [file d3qo00914a1.pdf]
